# Supplementary material for: Diastereoselective formation of homochiral flexible perylene bisimide cyclophanes and their hybrids with fullerenes
Source: Royal Society of Chemistry journal article supplement (doi:10.1039/d1sc04242d), 2021-01-01
Supplement: d1sc04242d1.pdf [file d1sc04242d1.pdf]

## Supporting Information

# Diastereoselective Formation of Homochiral Flexible Perylene Bisimide Cyclophanes and their Hybrids with Fullerenes

Iris Solymosi,<sup>[a]#</sup> Swathi Krishna,<sup>[b]#</sup> Edurne Nuin,<sup>[c]</sup> Harald Maid,<sup>[a]</sup> Barbara Scholz,<sup>[a]</sup> Dirk M. Guldi,<sup>[b]</sup> M. Eugenia Pérez-Ojeda<sup>\*[a]</sup> and Andreas Hirsch<sup>\*[a]</sup>

---

[a] I. Solymosi, H. Maid, B. Scholz, Dr. M. E. Pérez-Ojeda, Prof. Dr. A. Hirsch  
Department of Chemistry and Pharmacy  
Friedrich-Alexander-University Erlangen-Nuremberg  
Nikolaus-Fiebiger-Straße 10  
91058 Erlangen (Germany)  
E-mail: eugenia.perez-ojeda@fau.de, andreas.hirsch@fau.de

[b] S. Krishna, Prof. Dr. D. M. Guldi  
Department of Chemistry and Pharmacy  
Friedrich-Alexander-University Erlangen-Nuremberg  
Egerlandstraße 3  
91058 Erlangen (Germany)  
E-mail: dirk.guldi@fau.de

[c] Dr. E. Nuin  
Instituto de Ciencia Molecular (ICMol)  
Universidad de Valencia  
Catedrático José Beltrán 2  
Paterna 46980 (Spain)

# These authors contributed equally

### Table of contents

|                                                                    |     |
|--------------------------------------------------------------------|-----|
| 1. Materials and Methods .....                                     | S1  |
| 2. Synthesis .....                                                 | S3  |
| 3. HPLC chromatograms .....                                        | S12 |
| 4. Temperature-dependent <sup>1</sup> H NMR spectra.....           | S15 |
| 5. Calculation of the activation energy $\Delta G^\ddagger$ .....  | S21 |
| 6. NMR spectra.....                                                | S22 |
| 7. MS spectra.....                                                 | S30 |
| 8. UV-Vis absorption spectroscopy.....                             | S34 |
| 9. Fluorescence spectroscopy .....                                 | S38 |
| 10. Temperature-dependent absorption and fluorescence spectra..... | S41 |
| 11. Spectroelectrochemistry .....                                  | S42 |
| 12. Transient absorption measurements .....                        | S43 |
| 13. Global analysis of transient absorption spectra .....          | S50 |
| 14. Singlet oxygen quantum yield measurements.....                 | S66 |
| 15. 3D Fluorescence heat map .....                                 | S68 |
| 16. Literature.....                                                | S69 |

## 1. Materials and Methods

**General:** All chemicals and HPLC solvents were purchased from chemical suppliers and were used as received without further purification. C<sub>60</sub> (99.0%) was purchased from IoLiTec nanomaterials. All analytical-reagent grade solvents were purified by distillation with a rotary evaporator. Reactions were monitored by thin layer chromatography on silica gel 60 F254 0.2 mm on aluminium foil (Merck). Detection of the compounds was accomplished by means of a UV-lamp (254 nm or 366 nm). For column chromatography silica gel 60 M (230 - 400 mesh ASTM, 0.04 - 0.063 mm) from Marcherey-Nagel & Co. KG was used. Size exclusion chromatography was performed with polystyrene gel of the type S-X1 with a dry mesh size of 28-74  $\mu$ , marketed by Bio-Rad Laboratories.

### UV/Vis-NIR Spectroscopy:

UV-vis absorption spectroscopy was performed using UV WinLab software on PerkinElmer Lambda 2 dual beam absorption spectrophotometer, with a scan rate of 480 nm/min. The samples were measured in a 10 mm $\times$ 10 mm quartz cuvette.

### Fluorescence Spectroscopy:

Steady-state emission spectra were obtained using Horiba Jobin Yvon FluoroMax-3 emission spectrometer, with a slit width of 3 nm and an integration time of 0.1 s in the wavelength range of 525 – 850 nm. The data were processed in FluorEssence software. The samples were measured in a 10 mm $\times$ 10 mm quartz cuvette. Quantum yields of the samples were calculated following the relative method using Rhodamine B in ethanol ( $\phi = 0.70$ ) as reference. <sup>1</sup>O<sub>2</sub> quantum yield measurements were performed on FluoroLog3 spectrometer (Horiba) with Symphony II detector in the NIR detection range. The samples were purged with oxygen for 20 -30 mins. Quantum yields were calculated using C<sub>60</sub> in air-equilibrated toluene ( $\Phi_{\Delta}^{\text{ref}} = 0.98 \pm 0.05$ ) as reference.

### Spectroelectrochemistry:

Spectroelectrochemistry was performed using a PGSTAT101 Autolab potentiostat and AvaSpec spectrometer. A three-electrode setup comprising a Pt-gauze as working electrode, a Pt-wire as counter electrode and a silver wire as a reference electrode was used. 0.1 M tetrabutylammonium hexafluorophosphate was used as supporting electrolyte. The data were recorded with NOVA 1.10 software.

### Transient absorption spectroscopy:

Femtosecond and nanosecond transient absorption spectroscopy measurements were performed using the pump/probe systems HELIOS (0 to 5500 ps) and EOS (1 ns to 350  $\mu$ s) from Ultrafast Systems.

The laser source was CPA2101 and 2110 Ti:Sapphire amplifier (775 nm output, 1 kHz repetition rate, 150 fs pulse width; 500 nJ excitation laser energy) from Clark-MXR Inc. The desired excitation pulse of 550 nm was generated with NOPA. The white light for the femtosecond experiments was generated using a Sapphire crystal. The white light for the nanosecond transient measurements came from a supercontinuum laser source (2 kHz repetition rate, 1 ns pulsewidth). Samples were taken in 2 x 10 mm optical glass cuvettes and purged with argon for 20 min. Optical densities (OD) of the samples were around 0.4 at the excitation wavelength. Global analyses of the resulting data were performed with the GloTarAn software.<sup>[1]</sup>

**FTIR-ATR Spectroscopy:** The FTIR-ATR spectra were obtained on a Bruker Tensor 27, Pike MIRacle™ ATR, Pike Technologies as well as on a ThermoFisher Scientific Nicolet iS5. The spectra were measured as pure solids or liquids and absorptions are given in wavenumbers  $\tilde{\nu}$  (cm<sup>-1</sup>).

**Analytical HPLC:** Analytical HPLC was carried out in a LC20-AT prominence liquid chromatograph, SHIMADZU CORPORATION, Analytical Instruments Division, Kyoto, Japan using a Nucleosil Column (EC250/4 Nucleosil 100-5) from Macherey-Nagel and 150  $\mu$ L injection volume. Before the injection, small aliquots of the reaction mixture (0.2 mL) were filtered through silica to avoid the possible blocking of the employed column due to the polymers formed in the reaction mixture. All chromatograms were processed with SHIMADZU LabSolution software and exported as ASCII files. The chromatograms are depicted at a wavelength of  $\lambda = 280$  nm or  $\lambda = 530$  nm and the following solvent gradient was used: CH<sub>2</sub>Cl<sub>2</sub>:ethyl acetate:MeOH 1:0:0  $\rightarrow$  75:20:5.

**NMR Spectroscopy:** NMR spectra were recorded on a BRUKER Avance 600 (<sup>1</sup>H: 600 MHz, <sup>13</sup>C: 151 MHz), BRUKER Avance 500 (<sup>1</sup>H: 500 MHz, <sup>13</sup>C: 125 MHz), BRUKER Avance 400 (<sup>1</sup>H: 400 MHz, <sup>13</sup>C: 101 MHz) spectrometers. Chemical shifts are given in ppm, referenced to residual solvent signals and reported relative to external SiMe<sub>4</sub>. Chloroform-d<sub>1</sub> (99.8%) and 1,1,2,2-tetrachloroethane-d<sub>2</sub> (99.5%) were purchased from Sigma Aldrich and were used as received without further purification. The resonance multiplicities are indicated as s (singlet), d (doublet), t (triplet) and m (multiplet).

**Mass spectrometry:** Spectra were recorded on BRUKER microTOF II focus (BRUKER Daltonik GmbH) and SHIMADZU Axima Confidence maXis 4G instruments (Nitrogen UV laser, 50 Hz, 337 nm). MALDI-TOF HRMS were recorded on a Bruker UltrafleXtreme TOF/TOF and trans-2-[3-(4-tert-butylphenyl)-2-methyl-propenylidene]malonitrile (DCTB) and 2,5-dihydroxy-benzoic acid (DHB) were used as matrices. The APPI mass spectra were obtained on Bruker maXis 4G TOF-mass spectrometer. ESI mass spectra were recorded on BRUKER microTOF II focus ESI-TOF spectrometer.

## 2. Synthesis

### Synthesis of cyclophane **P2**

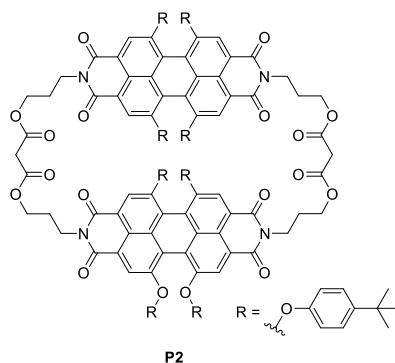

Experiment F: Pyridine anhydrous (18.7 mg, 19.2  $\mu\text{L}$ , 237  $\mu\text{mol}$ , 4 eq.) was added to a solution of compound **1** (130 mg, 118  $\mu\text{mol}$ , 2 eq.) and tetrathiafulvalene (12.5 mg, 61.1  $\mu\text{mol}$ , 97% purity, 1 eq.) in  $\text{CH}_2\text{Cl}_2$  anhydrous (225 mL). To the stirred reaction mixture, malonyl dichloride (17.2 mg, 11.9  $\mu\text{L}$ , 122  $\mu\text{mol}$ , 97% purity, 2 eq.) in  $\text{CH}_2\text{Cl}_2$  anhydrous (5 mL) was added with an automatic syringe pump within 3 h. After 29 h, 47 h and 51 h the previously described addition of malonyl dichloride was repeated three times. In total the solution was stirred at rt for 3 d. Afterwards, the solvent was removed under vacuum without drying completely and the crude product solution was separated by size exclusion chromatography (Biobeads S-X1, dry mesh size: 28-74  $\mu$ ,  $\text{CH}_2\text{Cl}_2$ ). The fractions containing compound **P2** (as indicated by TLC) were purified by column chromatography ( $\text{SiO}_2$ ,  $\text{CH}_2\text{Cl}_2$ :ethyl acetate, 1:0  $\rightarrow$  99:1). The mixed fractions containing compound **P2** were further purified by column chromatography ( $\text{SiO}_2$ ,  $\text{CH}_2\text{Cl}_2$ :ethyl acetate, 1:0  $\rightarrow$  90:10) to obtain **P2** (11.2 mg, 4.80  $\mu\text{mol}$ , 8.1%) as dark purple solid.

**TLC (Hexane:ethyl acetate, 3:1):**  $R_f = 0.22$ .

**$^1\text{H}$  NMR (500 MHz,  $\text{C}_2\text{D}_2\text{Cl}_4$ , 90  $^\circ\text{C}$ ):**  $\delta = 7.84$  (s, 8H,  $\text{CH}_{\text{PBI}}$ ), 7.16 – 7.10 (m, 16H,  $\text{CH}_{\text{phenoxy}}$ ), 6.75 – 6.66 (m, 16H,  $\text{CH}_{\text{phenoxy}}$ ), 4.19 – 4.08 (m, 8H,  $\text{CH}_2$ ), 4.07 – 3.90 (m, 8H,  $\text{CH}_2$ ), 3.21 (bs, 4H,  $\text{OCCH}_2\text{CO}$ ), 2.01 – 1.82 (m, 8H,  $\text{CH}_2$ ), 1.26 ppm (s, 72H,  $\text{CH}_3$ ).

**$^{13}\text{C}$  NMR (126 MHz,  $\text{C}_2\text{D}_2\text{Cl}_4$ , 90  $^\circ\text{C}$ ):**  $\delta = 166.30$  (4C,  $\text{O}-\text{C}=\text{O}$ ), 163.08 (8C,  $\text{N}-\text{C}=\text{O}$ ), 155.91 (8C,  $\text{C}-\text{O}$ ), 153.33 (8C,  $\text{C}_{\text{phenoxy}}-\text{O}$ ), 147.56 (8C,  $\text{C}_{\text{phenoxy}}$ ), 132.77 (4C,  $\text{C}_{\text{PBI}}$ ), 126.60 (16C,  $\text{HC}_{\text{phenoxy}}$ ), 122.24 (8C,  $\text{C}_{\text{PBI}}$ ), 120.69 (8C,  $\text{C}_{\text{PBI}}$ ), 120.19 (8C,  $\text{HC}_{\text{PBI}}$ ), 119.55 (16C,  $\text{HC}_{\text{phenoxy}}$ ), 119.44 (4C,  $\text{C}_{\text{PBI}}$ ), 63.65 (4C,  $\text{CH}_2$ ), 42.12 (2C,  $\text{O}=\text{CCH}_2\text{C}=\text{O}$ ), 38.04 (4C,  $\text{CH}_2$ ), 34.48 (8C,  $\text{C}(\text{CH}_3)_3$ ), 31.70 (24C,  $\text{CH}_3$ ), 27.46 ppm (4C,  $\text{CH}_2$ ).

**HRMS (APPI):**  $m/z$  calcd for  $[\text{C}_{146}\text{H}_{140}\text{N}_4\text{O}_{24}]^+$  2332.9852, found: 2332.9897.

**IR (ATR, rt):**  $\tilde{\nu} = 2958, 2924, 2853, 1732, 1694, 1659, 1584, 1505, 1459, 1292, 1260, 1217, 1152, 1091, 1016, 799, 745, 700 \text{ cm}^{-1}$ .

**UV-vis ( $\text{CH}_2\text{Cl}_2$ ):**  $\epsilon$  ( $\lambda_{\text{max}}$ ) = 18143 (536), 15833 (576)  $\text{M}^{-1}\cdot\text{cm}^{-1}$  (nm).

### Synthesis of cyclophane **P3**

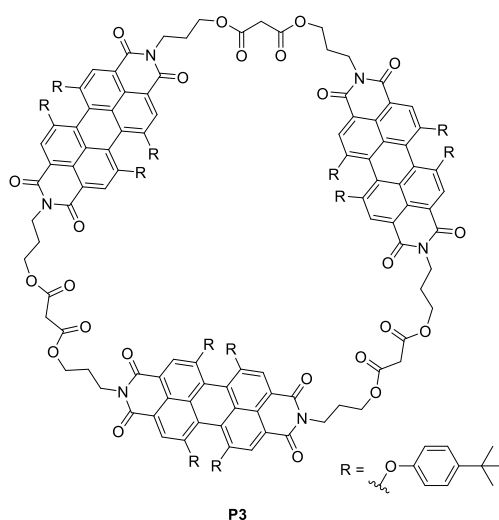

Pyridine anhydrous (28.8 mg, 29.5  $\mu\text{L}$ , 364  $\mu\text{mol}$ , 2 eq.) was added to a solution of compound **1** (200 mg, 182  $\mu\text{mol}$ , 1 eq.) in  $\text{CH}_2\text{Cl}_2$  anhydrous (250 mL). Malonyl dichloride (25.6 mg, 17.7  $\mu\text{L}$ , 182  $\mu\text{mol}$ , 1 eq.) in  $\text{CH}_2\text{Cl}_2$  anhydrous (24 mL) was added dropwise with a dropping funnel. The solution was stirred at rt for 5 d. Afterwards, the solvent was removed under vacuum without drying completely and the crude product solution was separated by size exclusion chromatography (Biobeads S-X1, dry mesh size: 28-74  $\mu$ ,  $\text{CH}_2\text{Cl}_2$ ). The fractions containing **P3** (as indicated by TLC) were purified by column chromatography ( $\text{SiO}_2$ ,  $\text{CH}_2\text{Cl}_2$ :ethyl acetate:methanol, 1:0:0  $\rightarrow$  6:0:1) to yield compound **P3** (7.29 mg, 2.08  $\mu\text{mol}$ , 3.4%) as purple solid.

**TLC (Hexane:ethyl acetate, 3:1):**  $R_f = 0.17$ .

**$^1\text{H}$  NMR (500 MHz,  $\text{C}_2\text{D}_2\text{Cl}_4$ , 60  $^\circ\text{C}$ ):**  $\delta = 8.11$  (s, 12H,  $\text{CH}_{\text{PBI}}$ ), 7.14 – 7.10 (m, 24H,  $\text{CH}_{\text{phenoxy}}$ ), 6.77 – 6.72 (m, 24H,  $\text{CH}_{\text{phenoxy}}$ ), 4.11 – 4.05 (m, 24H,  $\text{CH}_2$ ), 3.20 (s, 6H,  $\text{OCCH}_2\text{CO}$ ), 1.98 – 1.91 (m, 12H,  $\text{CH}_2$ ), 1.18 ppm (s, 108H,  $\text{CH}_3$ ).

**$^{13}\text{C}$  NMR (126 MHz,  $\text{C}_2\text{D}_2\text{Cl}_4$ , 60  $^\circ\text{C}$ ):**  $\delta = 166.55$  (6C,  $\text{O}-\text{C}=\text{O}$ ), 163.55 (12C,  $\text{N}-\text{C}=\text{O}$ ), 156.20 (12C,  $\text{C}-\text{O}$ ), 153.07 (12C,  $\text{C}_{\text{phenoxy}}-\text{O}$ ), 147.62 (12C,  $\text{C}_{\text{phenoxy}}$ ), 133.14 (6C,  $\text{C}_{\text{PBI}}$ ), 126.81 (24C,  $\text{HC}_{\text{phenoxy}}$ ), 122.45 (12C,  $\text{C}_{\text{PBI}}$ ), 120.97 (12C,  $\text{C}_{\text{PBI}}$ ), 120.24 (12C,  $\text{C}_{\text{PBI}}$ ), 119.66 (6C,  $\text{C}_{\text{PBI}}$ ), 119.50 (24C,  $\text{HC}_{\text{phenoxy}}$ ), 63.83 (6C,  $\text{CH}_2$ ), 41.55 (3C,  $\text{O}=\text{CCH}_2\text{C}=\text{O}$ ), 37.86 (6C,  $\text{CH}_2$ ), 34.47 (12C,  $\text{C}(\text{CH}_3)_3$ ), 31.68 (36C,  $\text{CH}_3$ ), 27.60 ppm (6C,  $\text{CH}_2$ ).

**HRMS (MALDI-TOF, dctb):**  $m/z$  calcd for  $[\text{C}_{219}\text{H}_{210}\text{N}_6\text{O}_{36}]^+$  3499.4781, found: 3499.4762.

**IR (ATR, rt):**  $\tilde{\nu} = 2965, 2364, 2343, 1753, 1699, 1662, 1589, 1505, 1440, 1412, 1288, 1217, 1174, 697, 668, 643, 633 \text{ cm}^{-1}$ .

**UV-vis ( $\text{CH}_2\text{Cl}_2$ ):**  $\epsilon$  ( $\lambda_{\text{max}}$ ) = 75823 (539), 104860 (579)  $\text{M}^{-1}\cdot\text{cm}^{-1}$  (nm).

## Synthesis of cyclophane **P4**

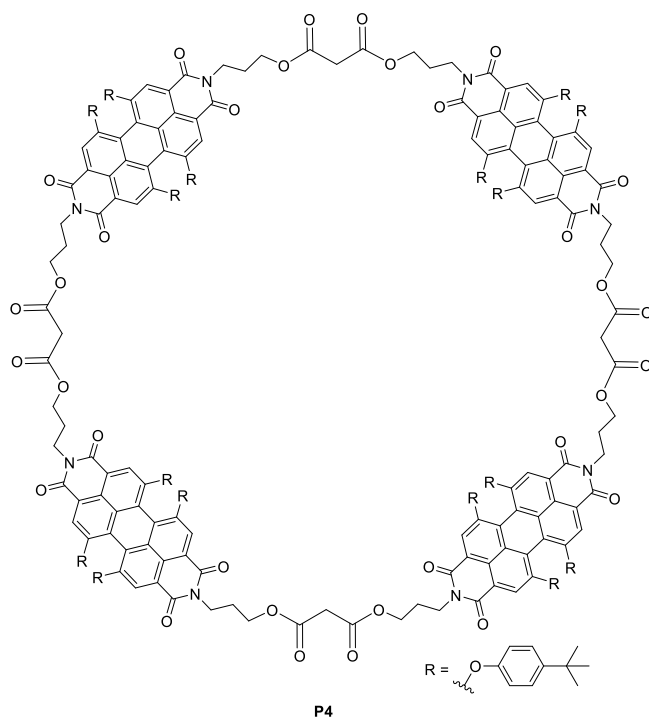

The reaction conditions and the purification by size exclusion and column chromatography are as described for compound **P3**. The fraction containing most of compound **P4** (as indicated by TLC) was further purified by preparative TLC (CH<sub>2</sub>Cl<sub>2</sub>:ethyl acetate 98:2) and subsequently purified by column chromatography (SiO<sub>2</sub>, hexane:ethyl acetate:CH<sub>2</sub>Cl<sub>2</sub>, 4:1:0 → 0:1:9) to yield **P4** (2.70 mg, 578 nmol, 1.3%) as purple solid.

**TLC (Hexane:ethyl acetate, 3:1):** R<sub>f</sub> = 0.10.

**<sup>1</sup>H NMR (400 MHz, CDCl<sub>3</sub>, rt):** δ = 8.08 (s, 16H, CH<sub>PBI</sub>), 7.19 – 7.15 (m, 32H, CH<sub>phenoxy</sub>), 6.78 – 6.72 (m, 32H, CH<sub>phenoxy</sub>), 4.19 – 4.09 (m, 32H, CH<sub>2</sub>), 3.31 (bs, 8H, OCCH<sub>2</sub>CO), 1.99 – 1.94 (m, 16H, CH<sub>2</sub>), 1.26 ppm (s, 144H, CH<sub>3</sub>).

**DEPTQ NMR (151 MHz, CDCl<sub>3</sub>, rt):** δ = 166.55 (8C, O-C=O), 163.33 (16C, N-C=O), 155.95 (16C, C-O), 153.03 (16C, C<sub>phenoxy</sub>-O), 147.30 (16C, C<sub>phenoxy</sub>), 132.88 (8C, C<sub>PBI</sub>), 126.71 (32C, HC<sub>phenoxy</sub>), 122.24 (16C, C<sub>PBI</sub>), 120.68 (16C, C<sub>PBI</sub>), 120.10 (16C, HC<sub>PBI</sub>), 119.48 (8C, C<sub>PBI</sub>), 119.37 (32C, HC<sub>phenoxy</sub>), 63.49 (8C, CH<sub>2</sub>), 41.54 (4C, O=CCH<sub>2</sub>C=O), 37.66 (8C, CH<sub>2</sub>), 34.48 (16C, C(CH<sub>3</sub>)<sub>3</sub>), 31.59 (48C, CH<sub>3</sub>), 27.33 ppm (8C, CH<sub>2</sub>).

**HRMS (MALDI-TOF, dctb):** *m/z* calcd for [C<sub>292</sub>H<sub>280</sub>N<sub>8</sub>O<sub>48</sub>]<sup>+</sup> 4665.9710, found: 4665.9701.

**IR (ATR, rt):**  $\tilde{\nu}$  = 2957, 2920, 2851, 1738, 1697, 1657, 1587, 1503, 1409, 1338, 1288, 1217, 1171, 1015, 887, 837, 802 cm<sup>-1</sup>.

**UV-vis (CH<sub>2</sub>Cl<sub>2</sub>):** ε (λ<sub>max</sub>) = 58960 (540), 71264 (580) M<sup>-1</sup>·cm<sup>-1</sup> (nm).

## Synthesis of model compound **P1**

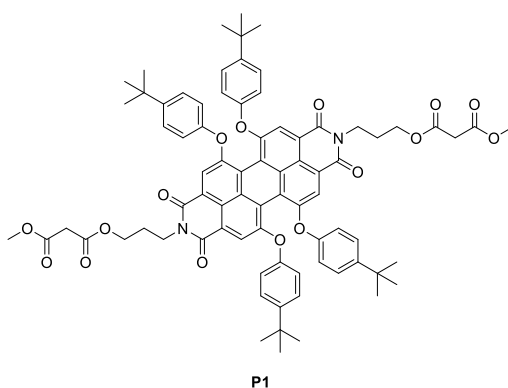

To a solution of **1** (200 mg, 0.1819 mmol, 1 eq.) in anhydrous CH<sub>2</sub>Cl<sub>2</sub> (100 mL) pyridine (122.3 mg, 1.546 mmol, 8.5 eq.) was added under inert atmosphere. The mixture was cooled in an ice bath for 10 min. Methyl malonyl chloride (99.3 mg, 728 μmol, 97% purity, 4 eq.) was added dropwise over 5 min. The reaction was warmed to rt and stirred overnight. The crude was washed with aq. HCl (40 mL), water (40 mL) and two times with brine (2x 40 mL). The combined organic layers were dried over MgSO<sub>4</sub> and the solvent was removed under vacuum. The solid was rotated onto SiO<sub>2</sub> and purified by column chromatography three times (SiO<sub>2</sub>, 1. CH<sub>2</sub>Cl<sub>2</sub>:EA 100:0 → 98:2, 2. CH<sub>2</sub>Cl<sub>2</sub>:EA 100:0 → 97:3, 3. CH<sub>2</sub>Cl<sub>2</sub>:Hex:THF 80:40:0 → 80:20:5) to yield PBI **P1** (140.2 mg, 108 μmol, 59%) as a purple solid.

**TLC (CH<sub>2</sub>Cl<sub>2</sub>:ethyl acetate 98:2):** R<sub>f</sub> = 0.71.

**<sup>1</sup>H NMR (400 MHz, CDCl<sub>3</sub>, rt):** δ = 8.22 (s, 4H, CH<sub>PBI</sub>), 7.25 – 7.21 (m, 8H, CH<sub>phenoxy</sub>), 6.84 – 6.80 (m, 8H, CH<sub>phenoxy</sub>), 4.23 (t, J = 6.4 Hz, 8H, NCH<sub>2</sub>/OCH<sub>2</sub>), 3.70 (s, 6H, OCH<sub>3</sub>), 3.36 (s, 4H, COCH<sub>2</sub>CO), 2.10 – 2.02 (m, 4H, CH<sub>2</sub>), 1.29 ppm (s, 36H, CH<sub>3</sub>).

**<sup>13</sup>C NMR (101 MHz, CDCl<sub>3</sub>, rt):** δ = 167.03 (2C, O-C=O), 166.59 (2C, O-C=O), 163.54 (4C, N-C=O), 156.15 (4C, C-O), 153.00 (4C, C<sub>phenoxy</sub>-O), 147.52 (4C, C<sub>phenoxy</sub>), 133.06 (2C, C<sub>PBI</sub>), 126.84 (2, 8C, HC<sub>phenoxy</sub>), 122.41 (4C, C<sub>PBI</sub>), 120.78 (4C, C<sub>PBI</sub>), 120.14 (4C, HC<sub>PBI</sub>), 119.59 (2C, C<sub>PBI</sub>), 119.46 (8C, HC<sub>phenoxy</sub>), 63.55 (2C, O-CH<sub>2</sub>), 52.65 (2C, O-CH<sub>3</sub>), 41.41 (2C, COCCO), 37.69 (2C, N-CH<sub>2</sub>), 34.53 (4C, C(CH<sub>3</sub>)<sub>3</sub>), 31.60 (12C, CH<sub>3</sub>), 27.41 ppm (2C, CH<sub>2</sub>).

**HRMS (MALDI-TOF, dctb):** *m/z* calcd for [C<sub>78</sub>H<sub>78</sub>N<sub>2</sub>O<sub>16</sub>]<sup>+</sup> 1298.5346, found: 1298.5364.

**IR (ATR, rt):**  $\tilde{\nu}$  = 2958, 2928, 2866, 1757, 1737, 1693, 1655, 1585, 1504, 1437, 1412, 1358, 1337, 1311, 1287, 1217, 1170 cm<sup>-1</sup>.

**UV-vis (DCM):** ε (λ<sub>max</sub>) = 24 823 (541), 40 558 (580) M<sup>-1</sup>·cm<sup>-1</sup> (nm).





## Synthesis of functional hybrid **P2F2<sub>Et</sub>**

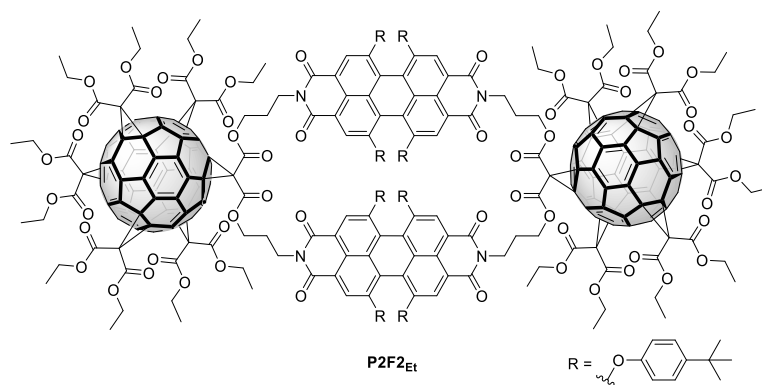

Cyclophane **P2** (5.00 mg, 2.14  $\mu\text{mol}$ , 1 eq.), pentakisadduct **F<sub>Et</sub>** (9.71 mg, 6.42  $\mu\text{mol}$ , 3 eq.) and  $\text{CBr}_4$  (1.56 mg, 4.71  $\mu\text{mol}$ , 2.2 eq.) were dissolved in  $\text{CH}_2\text{Cl}_2$  anhydrous (4.20 mL) under inert atmosphere. The solution was stirred for 10 min at rt.  $\text{P}_1$ -*t*Bu (1.14 mg, 1.21  $\mu\text{L}$ , 4.86  $\mu\text{mol}$ , 97% purity, 2.2 eq.) was added and the mixture was stirred at rt. After 40 min more pentakisadduct **F<sub>Et</sub>** (4.86 mg, 3.21  $\mu\text{mol}$ , 1.5 eq.) was added. After stirring overnight  $\text{CBr}_4$  (780  $\mu\text{g}$ , 2.36  $\mu\text{mol}$ , 1.1 eq.) and  $\text{P}_1$ -*t*Bu (570  $\mu\text{g}$ , 1.21  $\mu\text{L}$ , 2.43  $\mu\text{mol}$ , 97% purity, 1.1 eq.) dissolved in  $\text{CH}_2\text{Cl}_2$  anhydrous (1.00 mL) were added to complete the reaction. The solution was directly purified by column chromatography ( $\text{SiO}_2$ ,  $\text{CH}_2\text{Cl}_2$ :ethyl acetate, 1:0  $\rightarrow$  90:10) to obtain cyclophane fullerene adduct **P2F2<sub>Et</sub>** (8.00 mg, 1.49  $\mu\text{mol}$ , 70%) as purple solid.

**TLC ( $\text{CH}_2\text{Cl}_2$ :ethyl acetate, 99.8:0.2):**  $R_f$  = 0.12.

**$^1\text{H}$  NMR (400 MHz,  $\text{C}_2\text{D}_2\text{Cl}_4$ , 90 °C):**  $\delta$  = 7.82 (s, 8H,  $\text{CH}_{\text{PBI}}$ ), 7.15 – 7.10 (m, 16H,  $\text{CH}_{\text{phenoxy}}$ ), 6.77 – 6.64 (m, 16H,  $\text{CH}_{\text{phenoxy}}$ ), 4.43 – 4.25 (m, 8H,  $\text{CH}_2$  / 40H,  $\text{CH}_2$ ), 4.15 – 4.03 (m, 8H,  $\text{CH}_2$ ), 2.13 – 1.95 (m, 8H,  $\text{CH}_2$ ), 1.31 – 1.25 ppm (m, 72H,  $\text{CH}_3$  / 60H,  $\text{CH}_3$ ).

**$^{13}\text{C}$  NMR (101 MHz,  $\text{C}_2\text{D}_2\text{Cl}_4$ , 90 °C):**  $\delta$  = 163.95, 163.92, 163.87, 163.83 (24C, CO), 162.98 (8C, N-C=O), 153.45 (8C,  $\text{C}_{\text{phenoxy-O}}$ ), 147.54 (8C,  $\text{C}_{\text{phenoxy}}$ ), 146.03, 145.98, 145.94, 145.92, 145.89, 145.84, 141.49, 141.45, 141.41, 141.40, 141.39, 141.35 (96C,  $\text{C}_{60\text{-sp}^2}$ ), 132.65 (4C,  $\text{C}_{\text{PBI}}$ ), 126.57 (16C,  $\text{HC}_{\text{phenoxy}}$ ), 122.22 (8C,  $\text{C}_{\text{PBI}}$ ), 120.57 (8C,  $\text{C}_{\text{PBI}}$ ), 120.40 (8C,  $\text{HC}_{\text{PBI}}$ ), 119.61 (16C,  $\text{HC}_{\text{phenoxy}}$ ), 119.37 (4C,  $\text{C}_{\text{PBI}}$ ), 69.78, 69.56 (24C,  $\text{C}_{60\text{-sp}^3}$ ), 64.88 (4C, O- $\text{CH}_2$ ), 63.22, 63.21 (20C,  $\text{CH}_2$ ), 46.12, 46.07 (12C, COCCO), 34.48 (8C,  $\text{C}(\text{CH}_3)_3$ ), 31.70 (24C,  $\text{CH}_3$ ), 27.48 (4C,  $\text{CH}_2$ ), 14.21 ppm (20C,  $\text{CH}_3$ ).

**HRMS (MALDI-TOF, dctb):**  $m/z$  calcd for  $[\text{C}_{336}\text{H}_{236}\text{N}_4\text{O}_{64}]^+$  5349.5330, found: 5349.5487.

**IR (ATR, rt):**  $\tilde{\nu}$  = 2959, 2926, 2867, 2854, 1743, 1698, 1660, 1589, 1505, 1263, 1206, 1171, 1076, 1012, 713, 528  $\text{cm}^{-1}$ .

**UV-vis ( $\text{CH}_2\text{Cl}_2$ ):**  $\epsilon$  ( $\lambda_{\text{max}}$ ) = 82483 (537), 62564 (575)  $\text{M}^{-1}\cdot\text{cm}^{-1}$  (nm).

## Synthesis of functional hybrid **P2F2**<sub>TEG</sub>

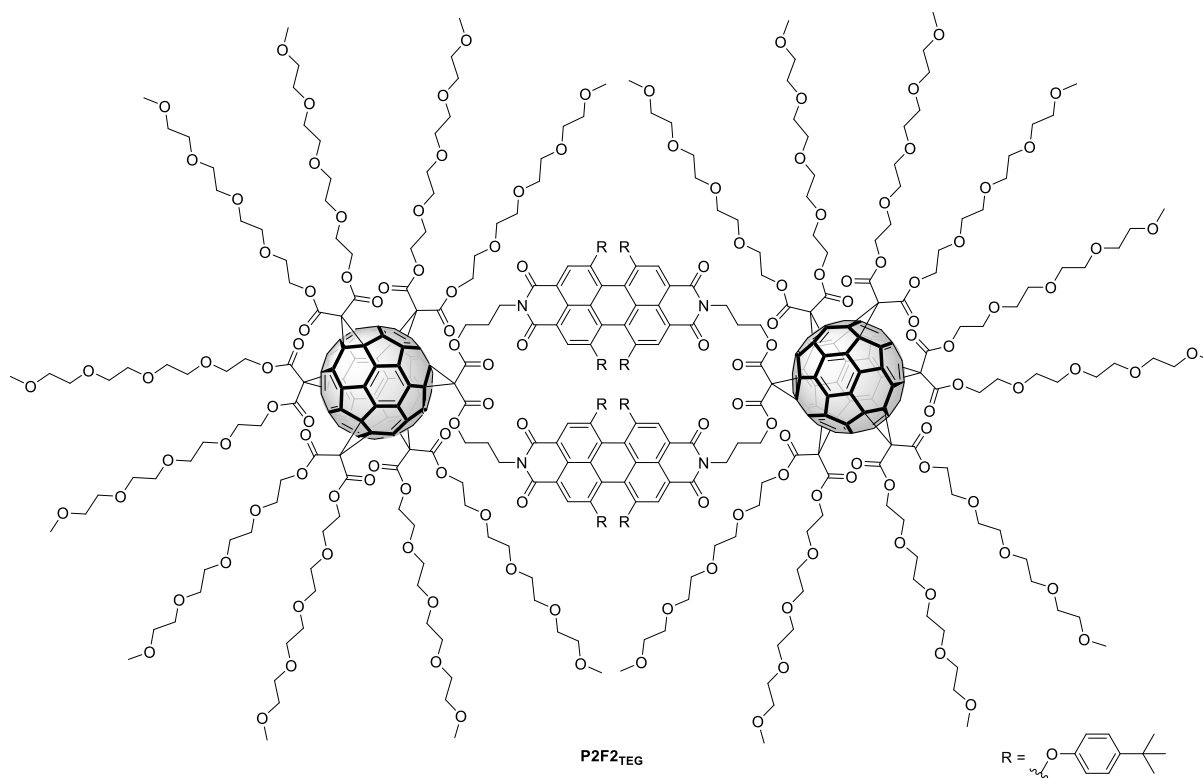

Cyclophane **P2** (5.00 mg, 2.14  $\mu\text{mol}$ , 1 eq.), pentakisadduct **F**<sub>TEG</sub> (20.1 mg, 6.42  $\mu\text{mol}$ , 3 eq.) and  $\text{CBr}_4$  (1.56 mg, 4.71  $\mu\text{mol}$ , 2.2 eq.) were dissolved in  $\text{CH}_2\text{Cl}_2$  anhydrous (4.20 mL).  $\text{P}_1$ -tBu (1.14 mg, 1.21  $\mu\text{L}$ , 4.86  $\mu\text{mol}$ , 97% purity, 2.2 eq.) was added and the mixture was stirred at rt under inert atmosphere. After 21 h,  $\text{CBr}_4$  (780  $\mu\text{g}$ , 2.36  $\mu\text{mol}$ , 1.1 eq.) and  $\text{P}_1$ -tBu (570  $\mu\text{g}$ , 605 nL, 2.43  $\mu\text{mol}$ , 97% purity, 1.1 eq.) were added to the mixture and stirred for additional 4 d. The process was repeated together with pentakisadduct **F**<sub>TEG</sub> (10.1 mg, 3.21  $\mu\text{mol}$ , 1.5 eq.) and the reaction mixture was stirred for another 6 d. The crude mixture was directly purified by column chromatography ( $\text{SiO}_2$ ,  $\text{CH}_2\text{Cl}_2$ :toluene:methanol, 100:60:15). The mixed fractions containing **P2F2**<sub>TEG</sub> were further purified by four fold column chromatography ( $\text{SiO}_2$ , 1.  $\text{CH}_2\text{Cl}_2$ :toluene:methanol, 100:60:12  $\rightarrow$  100:60:15, 2.  $\text{CH}_2\text{Cl}_2$ :toluene:methanol, 100:60:8  $\rightarrow$  90:70:25, 3.  $\text{CH}_2\text{Cl}_2$ :toluene:methanol, 90:70:15  $\rightarrow$  100:60:20, 4.  $\text{CH}_2\text{Cl}_2$ :toluene:methanol, 100:60:8  $\rightarrow$  100:60:12). The combined pure fractions yielded cyclophane fullerene adduct **P2F2**<sub>TEG</sub> (5.00 mg, 582 nmol, 27%) as purple viscous oil.

**TLC ( $\text{CH}_2\text{Cl}_2$ :toluene:methanol, 100:60:12):**  $R_f = 0.12$

**$^1\text{H}$  NMR (500 MHz,  $\text{C}_2\text{D}_2\text{Cl}_4$ , 110  $^\circ\text{C}$ ):**  $\delta = 7.82$  (s, 8H,  $\text{CH}_{\text{PBI}}$ ), 7.21 – 7.06 (m, 16H,  $\text{CH}_{\text{phenoxy}}$ ), 6.83 – 6.60 (m, 16H,  $\text{CH}_{\text{phenoxy}}$ ), 4.51 – 4.23 (m, 8H,  $\text{CH}_2$  / 40H,  $\text{COOCH}_2$ ), 4.16 – 4.06 (m, 8H,  $\text{CH}_2$ ), 3.84 – 3.37 (m, 280H,  $\text{OCH}_2$ ), 3.36 – 3.23 (m, 60H,  $\text{OCH}_3$ ), 2.14 – 2.04 (m, 8H,  $\text{CH}_2$ ), 1.28 ppm (s, 72H,  $\text{CH}_3$ ).

**DEPTQ NMR (126 MHz,  $\text{C}_2\text{D}_2\text{Cl}_4$ , 110  $^\circ\text{C}$ ):**  $\delta = 163.72, 163.68, 163.65, 163.58$  (24C, CO), 162.93 (8C, N-C=O), 155.81 (8C, C-O), 153.50 (8C,  $\text{C}_{\text{phenoxy-O}}$ ), 147.59 (8C,  $\text{C}_{\text{phenoxy}}$ ), 146.03, 145.99, 145.97, 145.92, 141.33 (96C,  $\text{C}_{60}\text{-sp}^2$ ), 132.67 (4C,  $\text{C}_{\text{PBI}}$ ), 126.54 (16C,  $\text{HC}_{\text{phenoxy}}$ ), 122.31 (8C,  $\text{C}_{\text{PBI}}$ ), 120.59 (8C,  $\text{C}_{\text{PBI}}$ ), 120.40

(8C, HC<sub>PBI</sub>), 119.62 (16C, HC<sub>phenoxy</sub>), 119.41 (4C, C<sub>PBI</sub>), 72.28, 70.93, 70.89, 70.83, 70.81, 70.64, 68.76 (140C, OCH<sub>2</sub>), 69.54 (24C, C<sub>60</sub>-sp<sup>3</sup>), 66.21 (20C, OCH<sub>2</sub>), 58.89 (20C, OCH<sub>3</sub>), 53.60, 46.01, 45.99 (12C, COCCO), 34.47 (8C, C(CH<sub>3</sub>)<sub>3</sub>), 31.68 ppm (24C, CH<sub>3</sub>).

**HRMS (ESI):**  $m/z$  calcd for [C<sub>476</sub>H<sub>516</sub>N<sub>4</sub>Na<sub>4</sub>O<sub>144</sub>]<sup>4+</sup> 2170.8187, found: 2170.8206.

**IR (ATR, rt):**  $\tilde{\nu}$  = 2953, 2920, 2868, 2853, 1742, 1698, 1505, 1350, 1282, 1258, 1214, 1171, 1093, 1025, 1016, 942, 872, 841, 803, 714, 551, 528 cm<sup>-1</sup>.

**UV-vis (CH<sub>2</sub>Cl<sub>2</sub>):**  $\epsilon$  ( $\lambda_{max}$ ) = 76456 (537), 57932 (575) M<sup>-1</sup>·cm<sup>-1</sup> (nm).

#### Synthesis of side product **P2F1**<sub>TEG</sub>

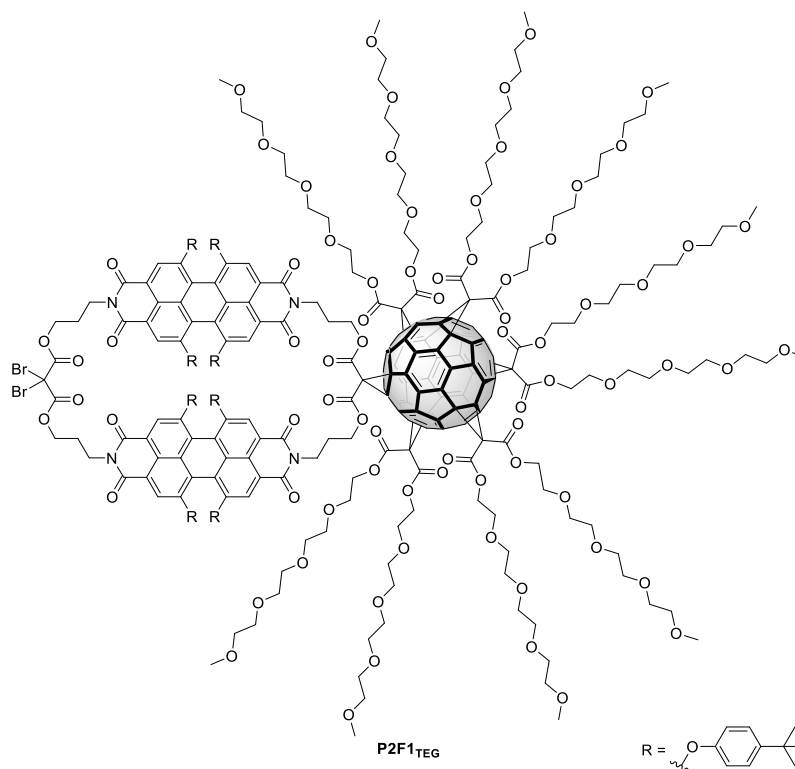

Cyclophane **P2** (5.00 mg, 2.14  $\mu$ mol, 1 eq.), pentakisadduct **F**<sub>TEG</sub> (20.1 mg, 6.42  $\mu$ mol, 3 eq.) and CBr<sub>4</sub> (1.56 mg, 4.71  $\mu$ mol, 2.2 eq.) were dissolved in CH<sub>2</sub>Cl<sub>2</sub> anhydrous (4.20 mL). P<sub>1</sub>-*t*Bu (1.14 mg, 1.21  $\mu$ L, 4.86  $\mu$ mol, 97% purity, 2.2 eq.) was added and the mixture was stirred at rt under inert atmosphere. After 80 min, another portion of CBr<sub>4</sub> (2.2 eq.) and P<sub>1</sub>-*t*Bu (2.2 eq.) were added and the mixture was stirred for additional 100 min. The crude solution was directly purified by column chromatography (SiO<sub>2</sub>, CH<sub>2</sub>Cl<sub>2</sub>:toluene:methanol, 100:60:12 -> 100:60:20) to obtain compound **P2F1**<sub>TEG</sub> (4.50 mg, 800 nmol, 37%) as purple viscous oil.

**TLC (CH<sub>2</sub>Cl<sub>2</sub>:toluene:methanol, 100:60:12):** R<sub>f</sub> = 0.19

**<sup>1</sup>H NMR (500 MHz, C<sub>2</sub>D<sub>2</sub>Cl<sub>4</sub>, 110 °C):**  $\delta$  = 7.84 (s, 4H, CH<sub>PBI</sub>), 7.80 (s, 4H, CH<sub>PBI</sub>), 7.18 – 7.10 (m, 16H, CH<sub>phenoxy</sub>), 6.76 – 6.65 (m, 16H, CH<sub>phenoxy</sub>), 4.50 – 4.28 (m, 8H, CH<sub>2</sub> / 20H, COOCH<sub>2</sub>), 4.16 – 4.05 (m, 8H,

$CH_2$ ), 3.75 – 3.43 (m, 140H,  $OCH_2$ ), 3.34 – 3.25 (m, 30H,  $OCH_3$ ), 2.12 – 1.98 (m, 8H,  $CH_2$ ), 1.28 ppm (s, 72H,  $CH_3$ ).

**DEPTQ NMR (126 MHz,  $C_2D_2Cl_4$ , 100 °C):**  $\delta$  = 163.70, 163.67, 163.32, 163.30, 162.99, 162.94 (14C, CO), 155.84, 155.82 (8C, C-O), 153.45, 153.41 (8C,  $C_{phenoxy-O}$ ), 147.62, 147.60, 147.58 (8C,  $C_{phenoxy}$ ), 146.10, 146.04, 146.00, 145.97, 145.94, 141.33, 141.31 (48C,  $C_{60-sp^2}$ ), 132.74, 132.65 (4C,  $C_{PBI}$ ), 126.58 (16C,  $HC_{phenoxy}$ ), 122.17 (8C,  $C_{PBI}$ ), 120.66 (8C,  $C_{PBI}$ ), 120.37 (8C,  $HC_{PBI}$ ), 119.60 (16C,  $HC_{phenoxy}$ ), 119.36 (4C,  $C_{PBI}$ ), 72.26, 72.24, 70.91, 70.89, 70.87, 70.85, 70.81, 70.80, 70.77, 70.63, 70.61, 68.75 (70C,  $OCH_2$ ), 69.53 (12C,  $C_{60-sp^3}$ ), 66.22 (10C,  $OCH_2$ ), 65.09, 65.07, 65.05 (4C,  $CH_2$ ), 58.91 (10C,  $OCH_3$ ), 46.17, 45.92 (12C, COCCO), 37.49, 37.47, 37.44 (4C,  $CH_2$ ), 34.48 (8C,  $C(CH_3)_3$ ), 31.67 (24C,  $CH_3$ ), 27.34, 27.32, 27.30 ppm (4C,  $CH_2$ ).

**HRMS (ESI):**  $m/z$  calcd for  $[C_{311}H_{326}Br_2N_4Na_2O_{84}]^{2+}$  2831.9756, found: 2831.9770.

**IR (ATR, rt):**  $\tilde{\nu}$  = 2953, 2919, 2868, 2853, 1742, 1698, 1659, 1591, 1343, 1284, 1266, 1212, 1172, 1104, 1038, 1025, 1013, 945, 902, 873, 839, 822, 803, 715, 554, 528  $cm^{-1}$ .

**UV-vis ( $CH_2Cl_2$ ):**  $\epsilon$  ( $\lambda_{max}$ ) = 78287 (537), 60178 (575)  $M^{-1}\cdot cm^{-1}$  (nm).

### 3. HPLC chromatograms

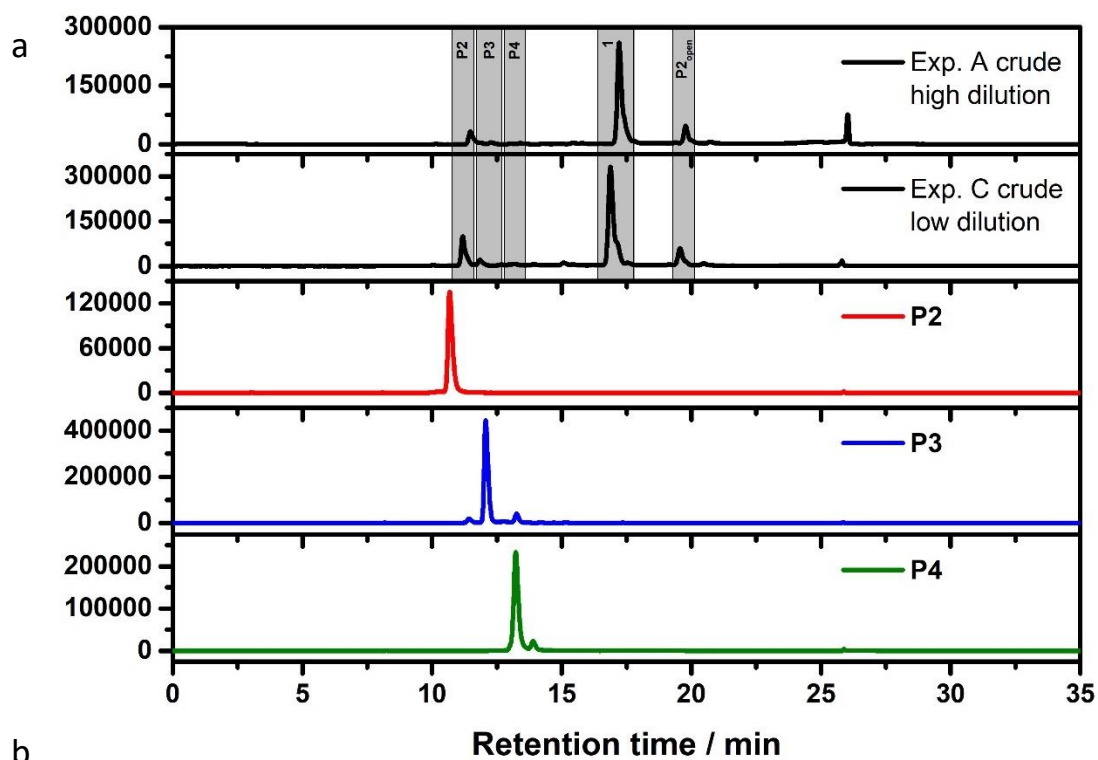

b

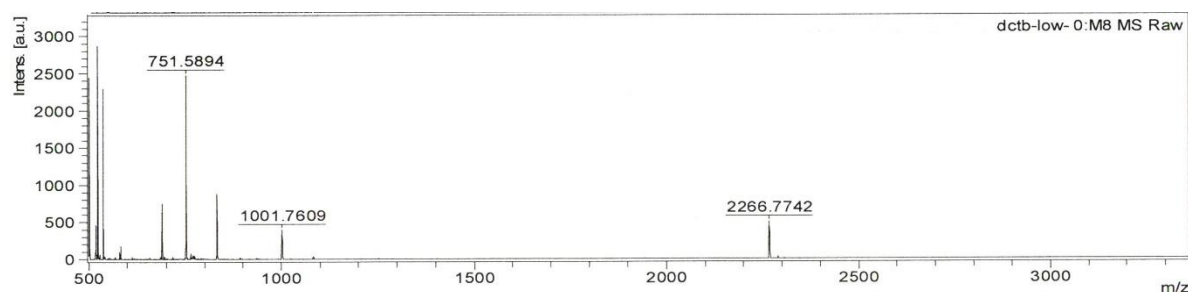

c

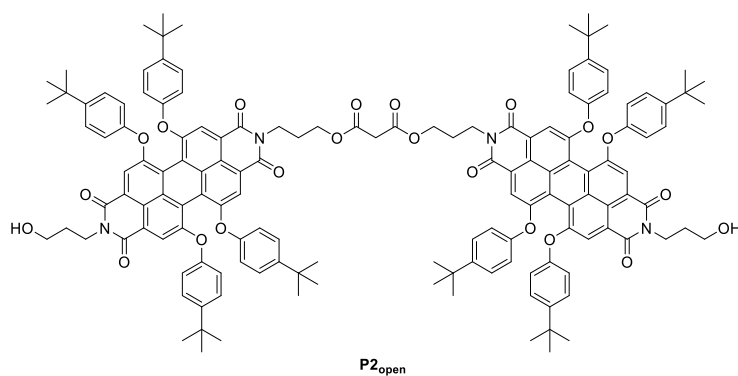

**Figure S1.** a) HPLC chromatograms of the crude mixtures of experiment A and C as well as the macrocycles **P2**, **P3** and **P4** analysed at a wavelength of 530 nm. b) Corresponding MALDI MS spectrum of **P2<sub>open</sub>**. c) Chemical structure of **P2<sub>open</sub>** with a retention time of approximately 20 min.

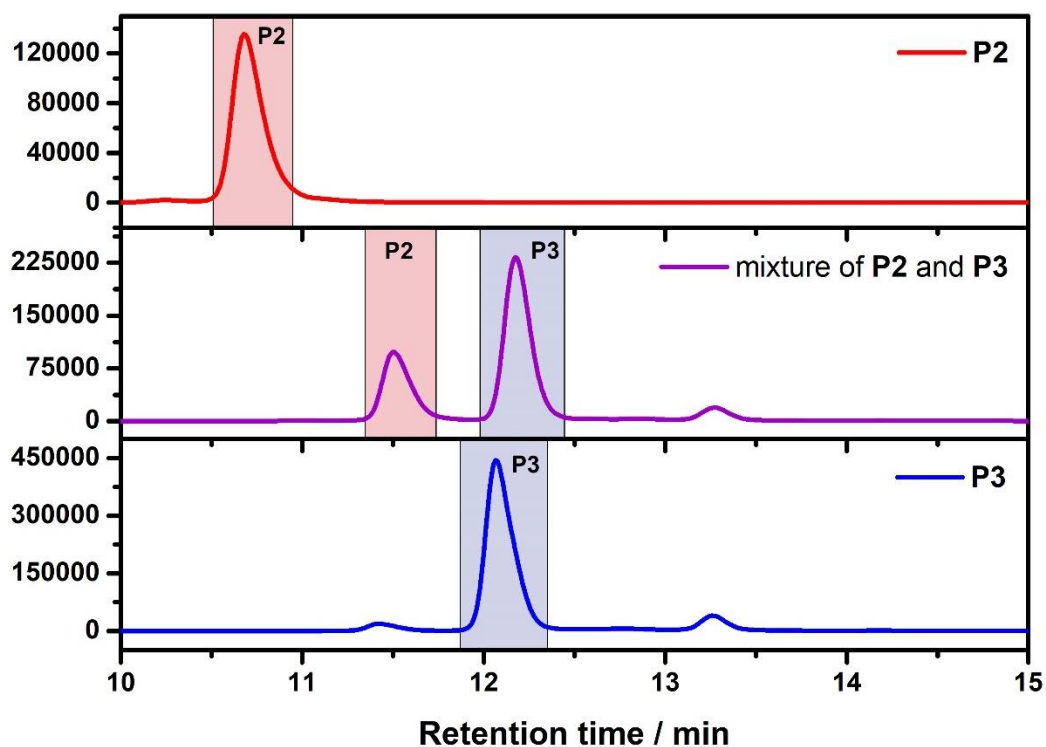

**Figure S2.** Comparison of the HPLC chromatograms of **P2** (top), **P3** (bottom) and a mixture of both cyclophanes (middle). The retention time of pure **P2** is less than the retention times of the two-membered ring in the different crude mixtures or in a mixture of only **P2** and **P3** (middle). It can be concluded that **P2** interacts with other molecules, which leads to a delay in the retention time.

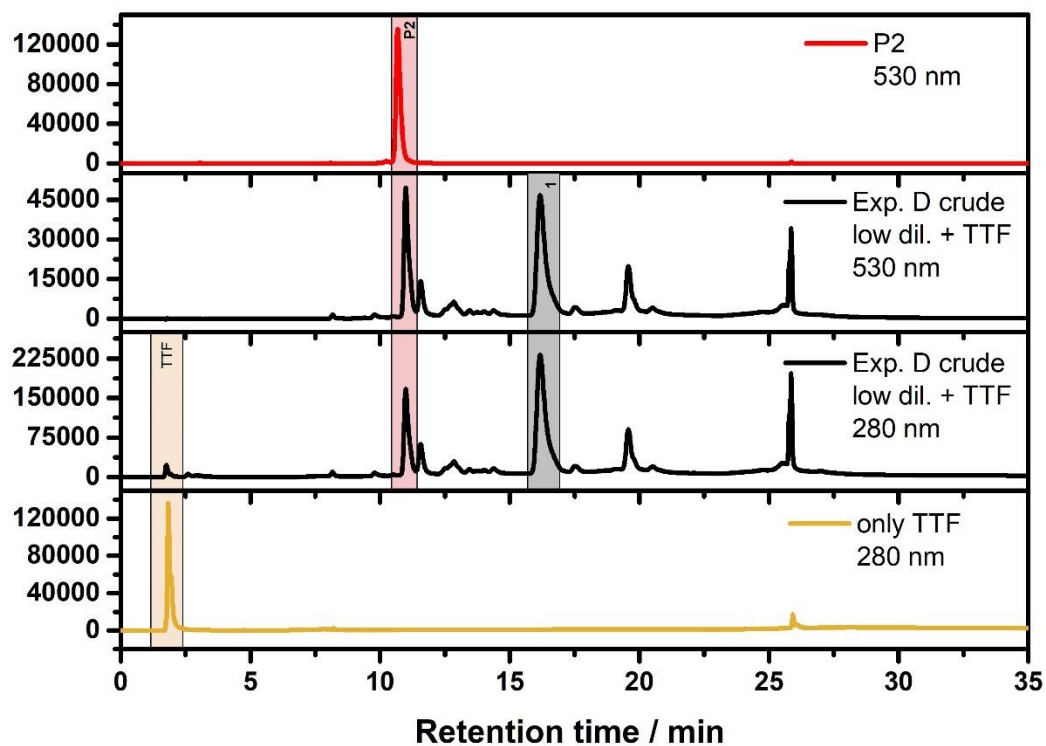

**Figure S3.** Comparison of the HPLC chromatograms of the crude mixture of experiment D evaluated both in the absorption region of **P2** (530 nm) and TTF (280 nm).

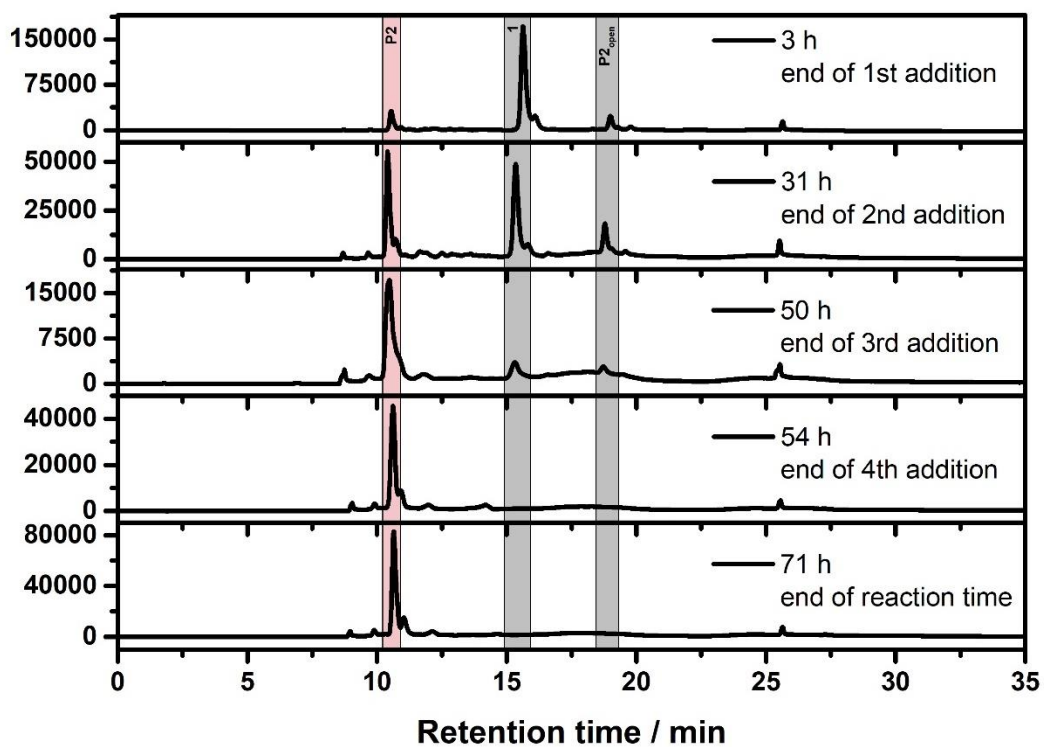

**Figure S4.** HPLC chromatograms of the crude mixture of experiment E at different times analysed at a wavelength of 530 nm.

#### 4. Temperature-dependent $^1\text{H}$ NMR spectra

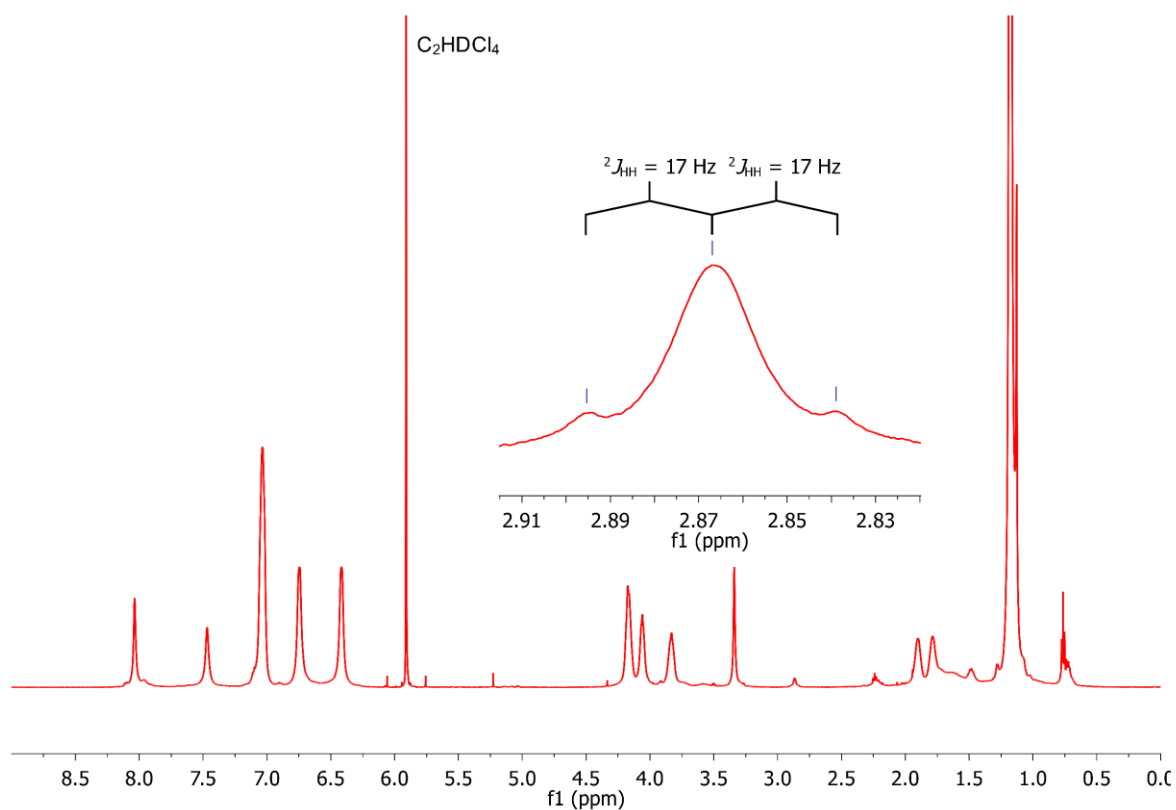

**Figure S5.**  $^1\text{H}$  NMR (600 MHz) spectrum of **P2** in  $\text{C}_2\text{D}_2\text{Cl}_4$  at  $-5\text{ }^\circ\text{C}$ , enlarged at 2.87 ppm with labelled peaks in Hz.

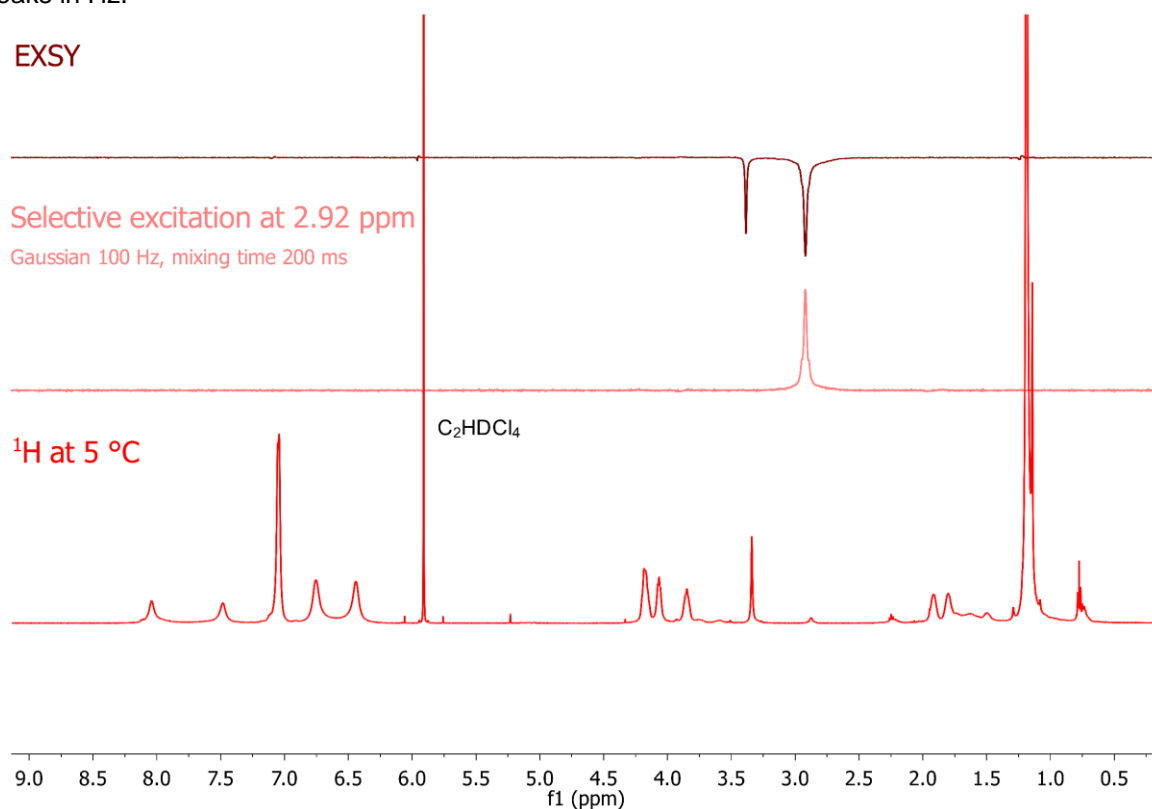

**Figure S6.**  $^1\text{H}$  and EXSY (600 MHz) NMR spectra of **P2** in  $\text{C}_2\text{D}_2\text{Cl}_4$  at  $5\text{ }^\circ\text{C}$  showing the selective excitation at 2.92 ppm.



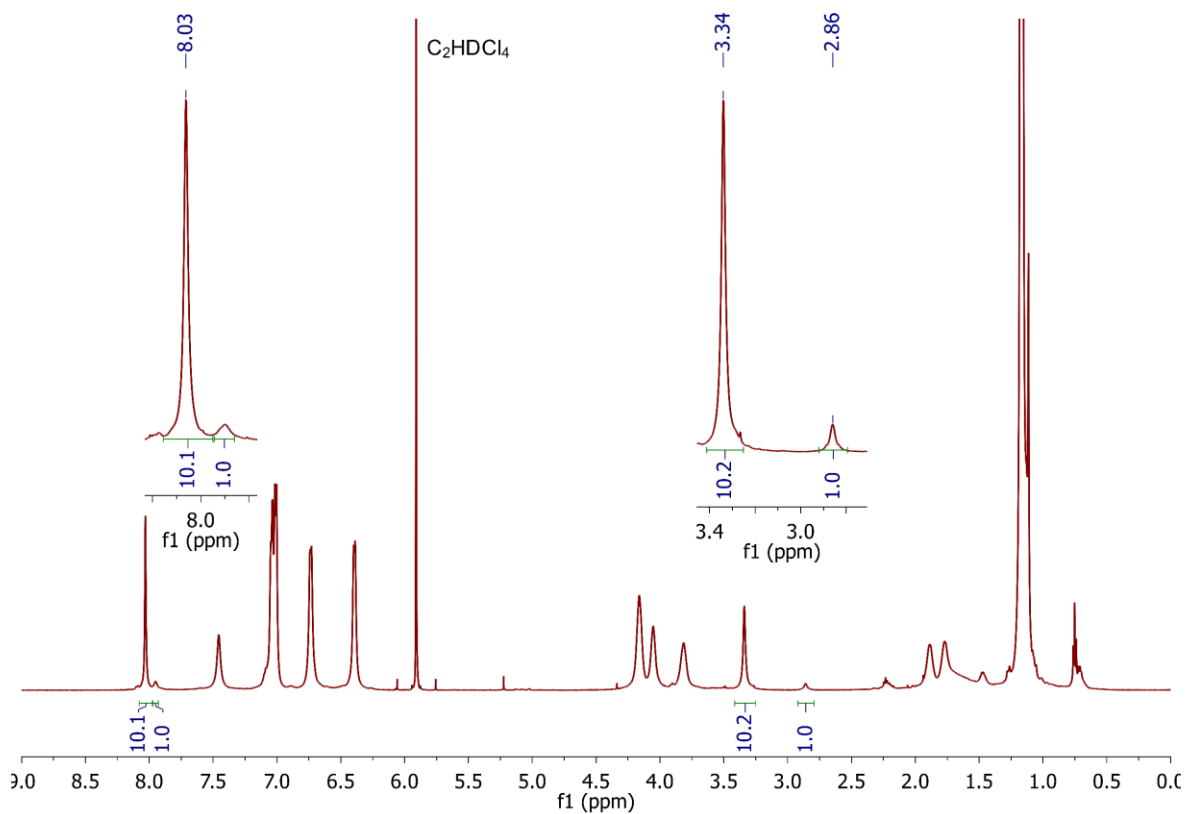

**Figure S7.**  $^1\text{H}$  (600 MHz) NMR spectrum of **P2** in  $\text{C}_2\text{D}_2\text{Cl}_4$  at  $-15\text{ }^\circ\text{C}$  showing the ratio of  $(P,P)/(M,M)$  :  $(P,M)/(M,P)$  of 10:1.

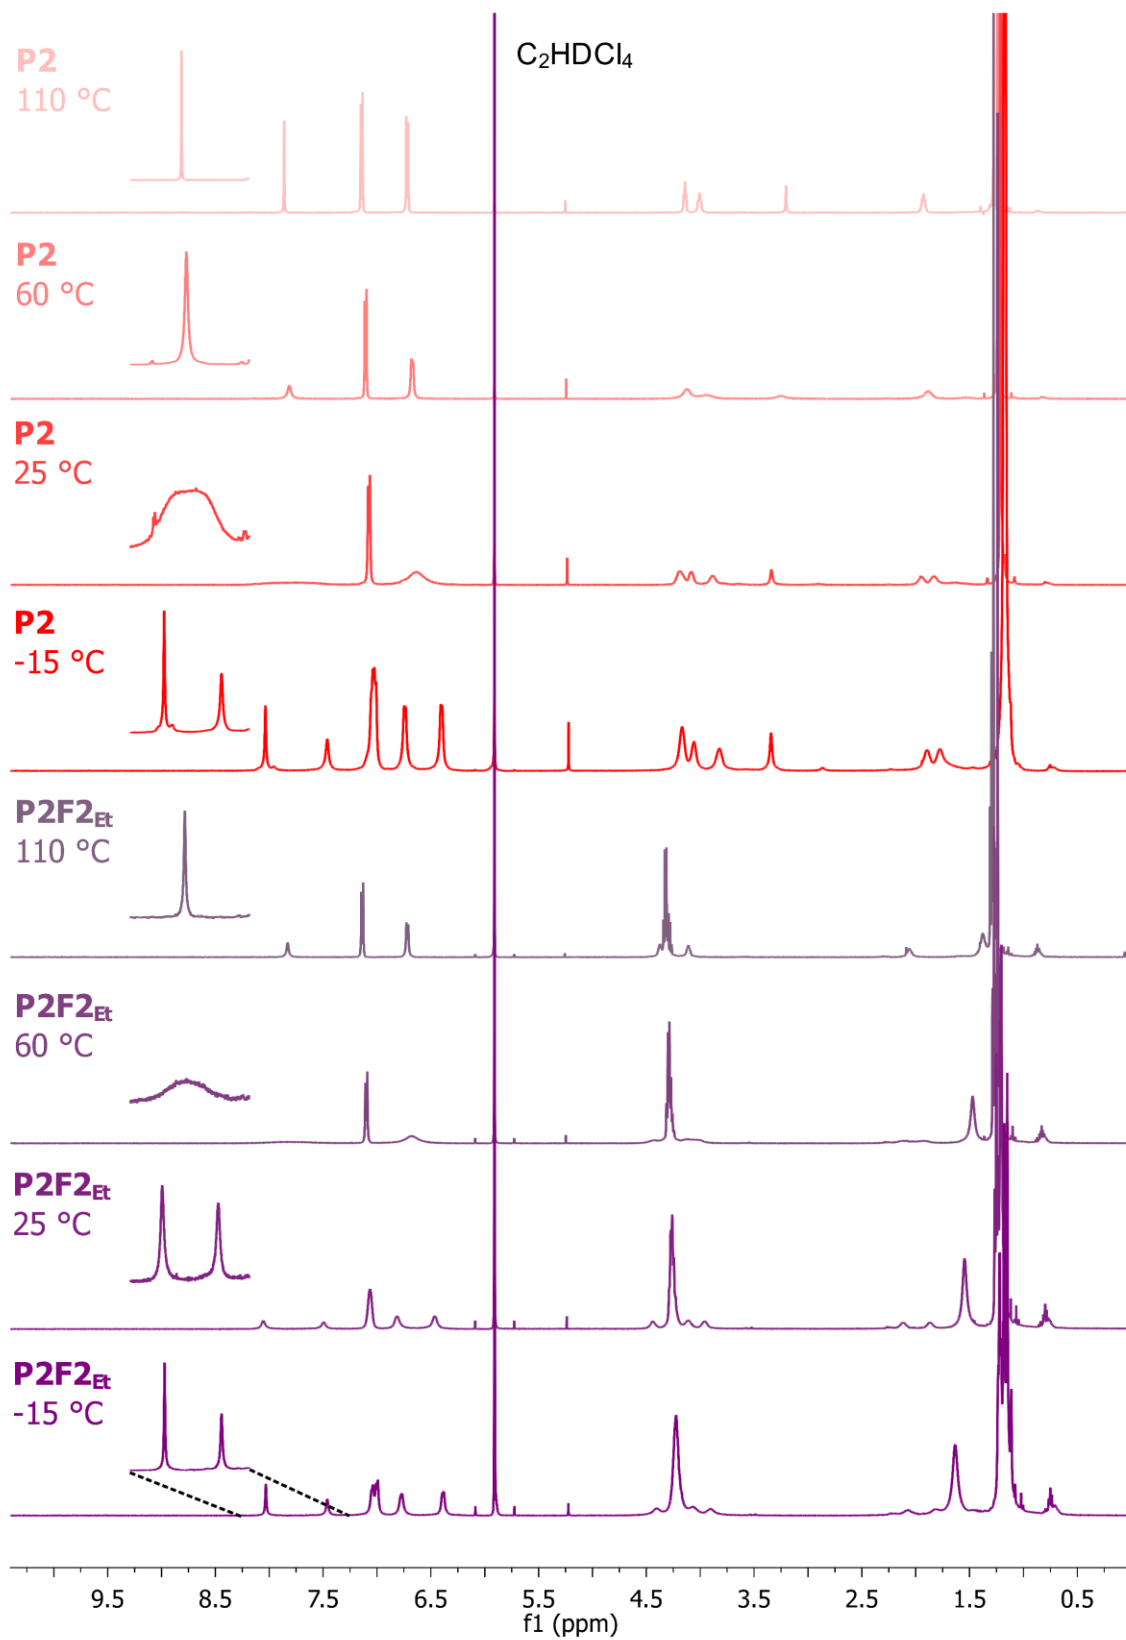

**Figure S8.** Temperature-dependent  $^1\text{H}$  (500 MHz) NMR spectra of **P2** and **P2F2<sub>Et</sub>** dissolved in  $\text{C}_2\text{D}_2\text{Cl}_4$ .

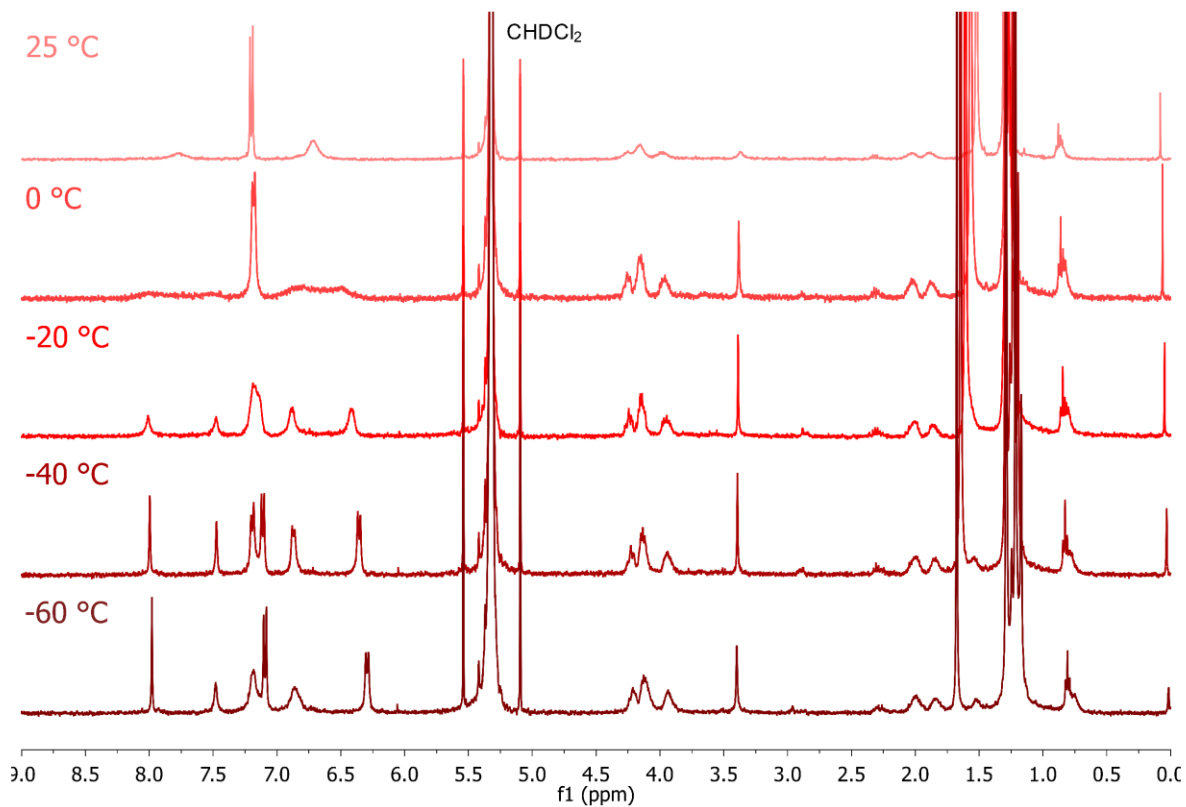

**Figure S9.** Temperature-dependent  $^1\text{H}$  (400 MHz) NMR spectra of **P2** dissolved in  $\text{CD}_2\text{Cl}_2$ .

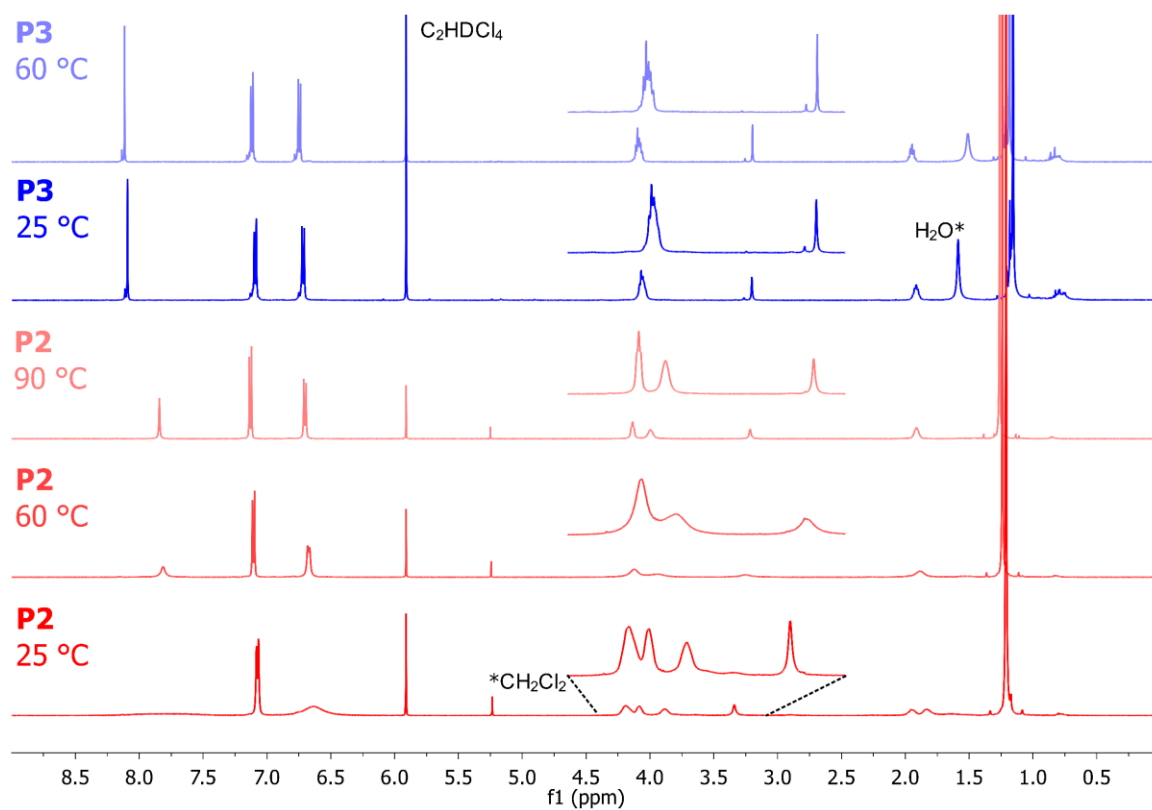

**Figure S10.** Temperature-dependent  $^1\text{H}$  (500 MHz) NMR spectra of **P2** and **P3** in  $\text{C}_2\text{D}_2\text{Cl}_4$ .

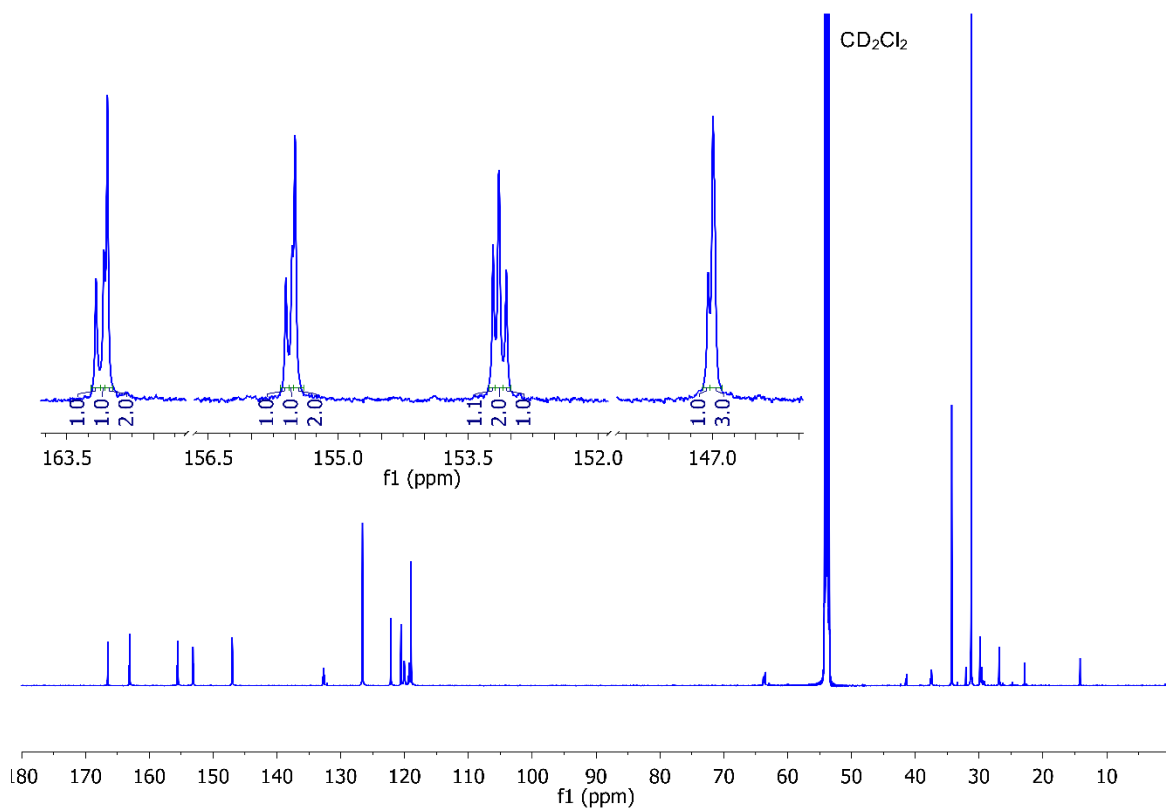

**Figure S11.**  $^{13}\text{C}$  (600 MHz) NMR spectrum of **P3** dissolved in  $\text{CD}_2\text{Cl}_2$  recorded at  $-20\text{ }^\circ\text{C}$ .

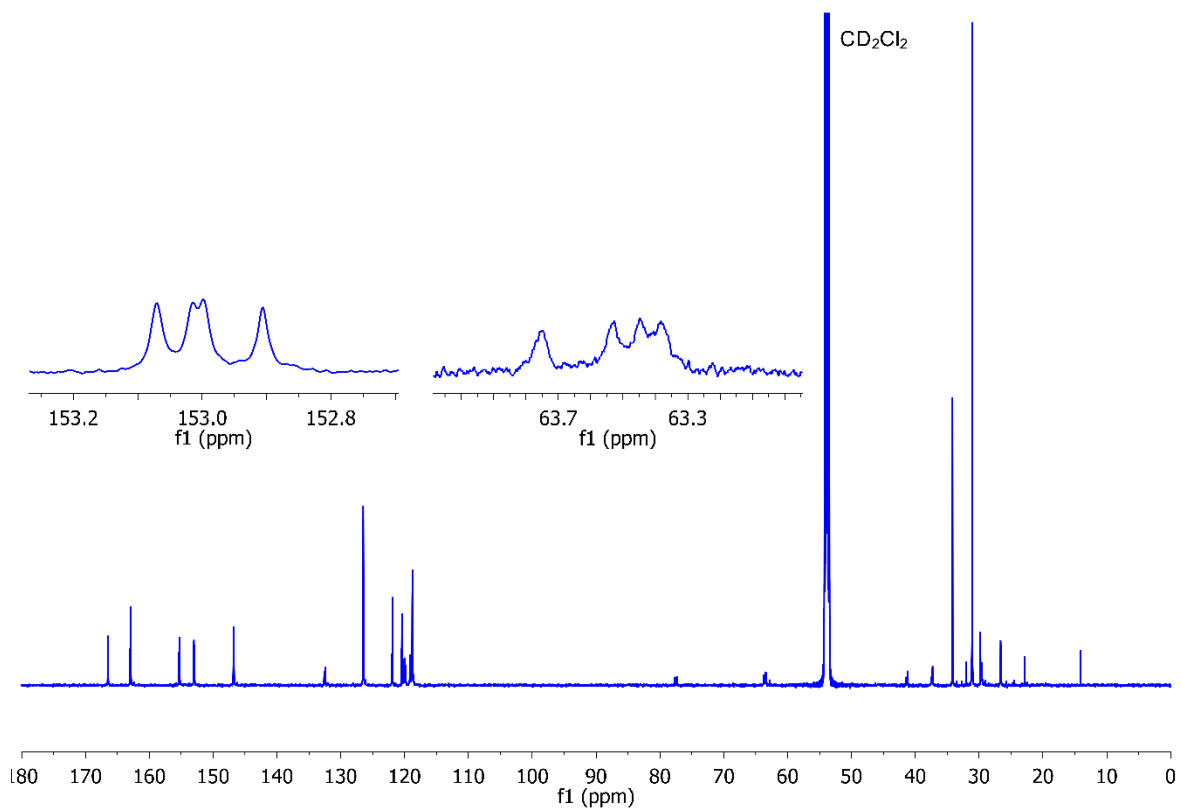

**Figure S12.**  $^{13}\text{C}$  (600 MHz) NMR spectrum of **P3** dissolved in  $\text{CD}_2\text{Cl}_2$  recorded at  $-38\text{ }^\circ\text{C}$ .

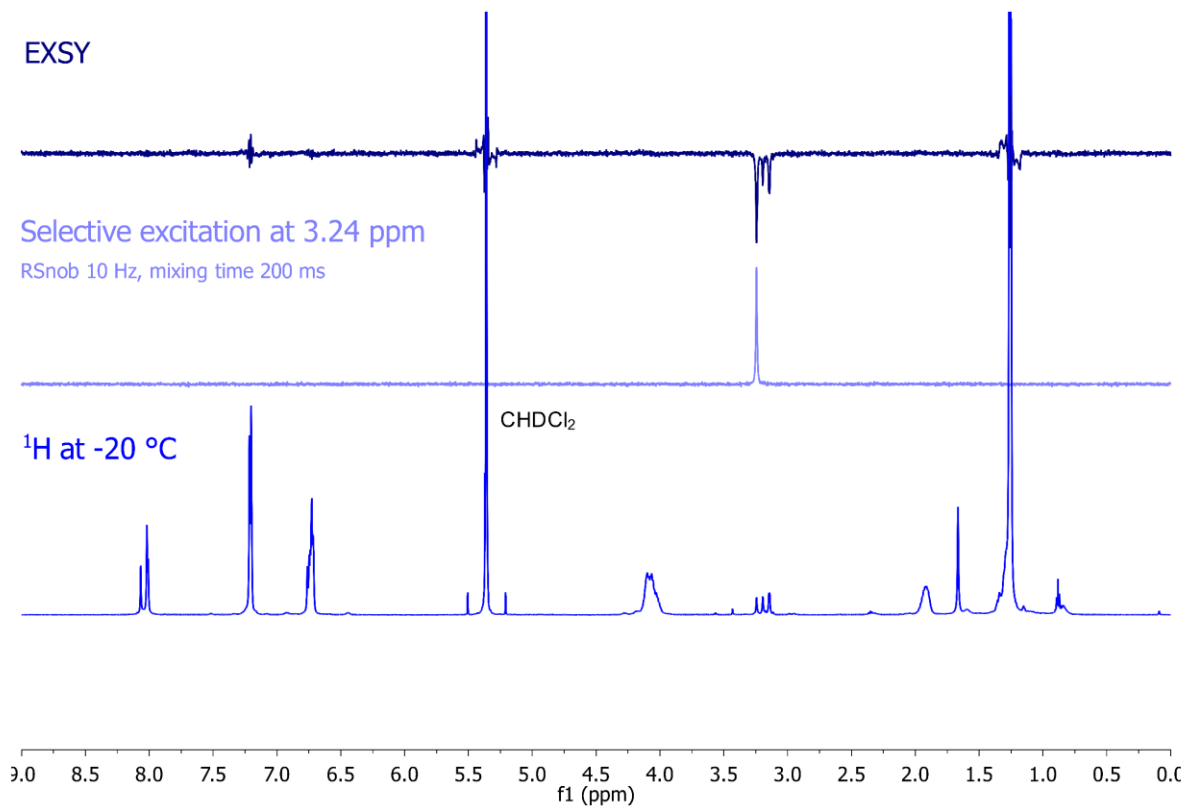

**Figure S13.**  $^1\text{H}$  and EXSY (600 MHz) NMR spectra of **P3** in  $\text{CD}_2\text{Cl}_2$  at  $-20\text{ }^\circ\text{C}$  showing the selective excitation at 3.24 ppm.

## 5. Calculation of the activation energy $\Delta G^\ddagger$

To calculate the activation energy  $\Delta G^\ddagger$  the following equation was used<sup>[2]</sup>:

$$\Delta G^\ddagger = RT_C \cdot \ln \left( \frac{RT_C \sqrt{2}}{\pi N_A h |\nu_A - \nu_B|} \right)$$

$\Delta G^\ddagger$ : activation energy for conformational interconversion;  $R$ : universal gas constant;  $N_A$ : Avogadro constant,  $h$ : Planck's constant,  $\nu$ : chemical shift

**Table S1.** Summary of the coalescence temperature and the difference in frequencies for the calculation of the activation energy.

| Compound                 | Solvent                                       | T <sub>c</sub> [K] | $ \nu_A - \nu_B $ [Hz] at T [K] | $\Delta G^\ddagger$ [kJ/mol] |
|--------------------------|-----------------------------------------------|--------------------|---------------------------------|------------------------------|
| <b>P2</b>                | CD <sub>2</sub> Cl <sub>2</sub>               | 273                | 205.45 at 233                   | 52.77                        |
| <b>P2</b>                | C <sub>2</sub> D <sub>2</sub> Cl <sub>4</sub> | 298                | 291.21 at 248                   | 56.95                        |
| <b>P2F2<sub>Et</sub></b> | CD <sub>2</sub> Cl <sub>2</sub>               | 292                | 29.27 at 253                    | 61.33                        |
| <b>P2F2<sub>Et</sub></b> | C <sub>2</sub> D <sub>2</sub> Cl <sub>4</sub> | 333                | 283.83 at 268                   | 64.02                        |

## 6. NMR spectra

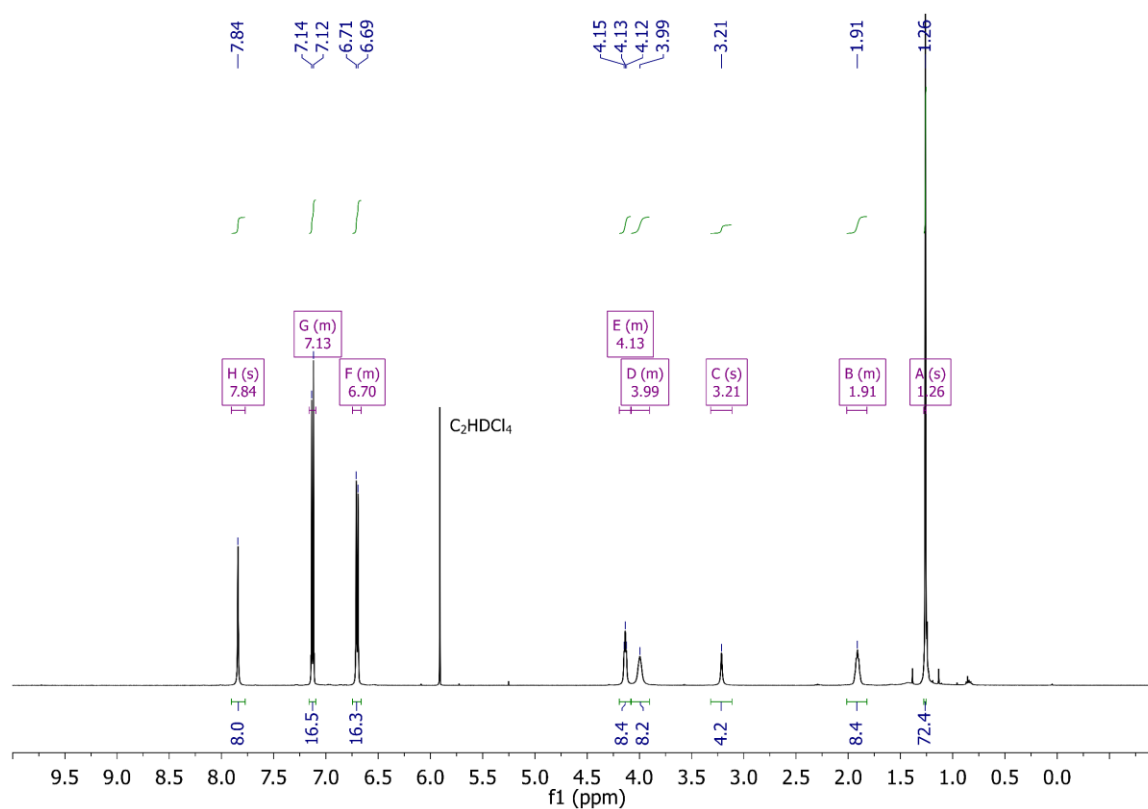

Figure S14.  $^1\text{H}$  NMR (500 MHz,  $\text{C}_2\text{D}_2\text{Cl}_4$ , 90 °C) spectrum of macrocycle **P2**.

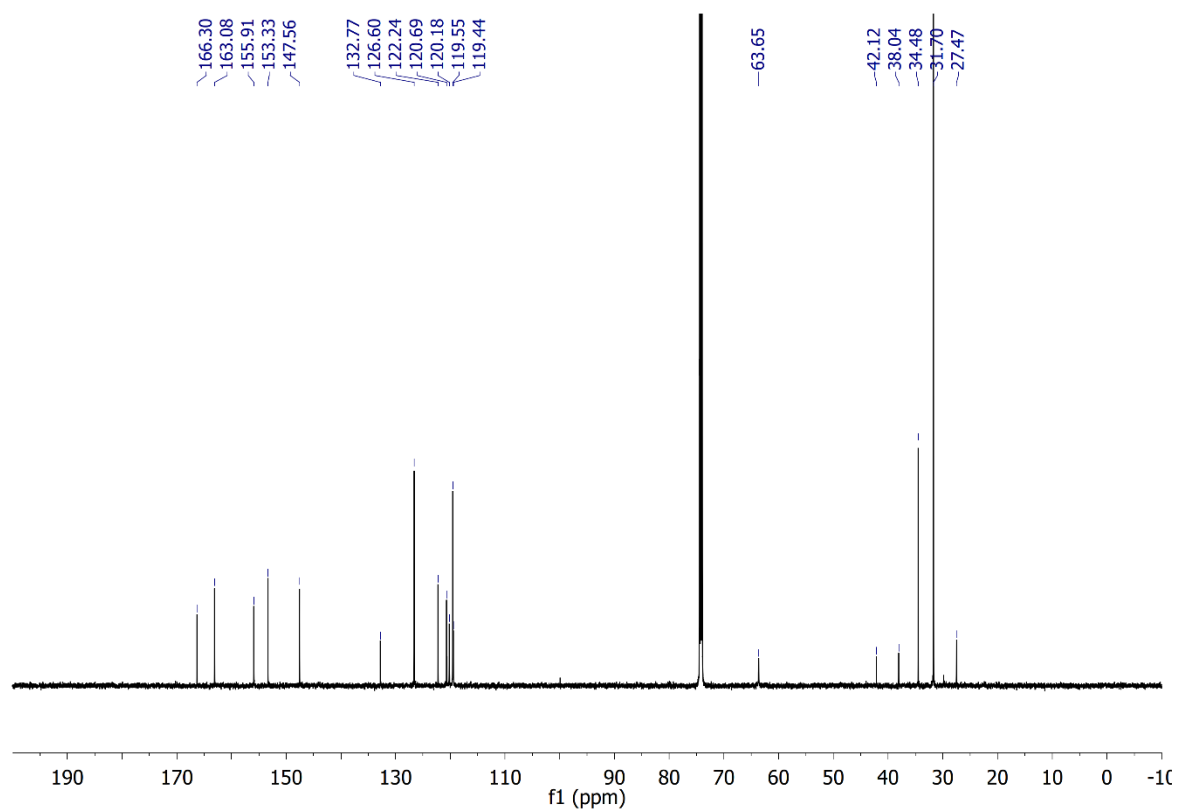

Figure S15.  $^{13}\text{C}$  NMR (126 MHz,  $\text{C}_2\text{D}_2\text{Cl}_4$ , 90 °C) spectrum of macrocycle **P2**.

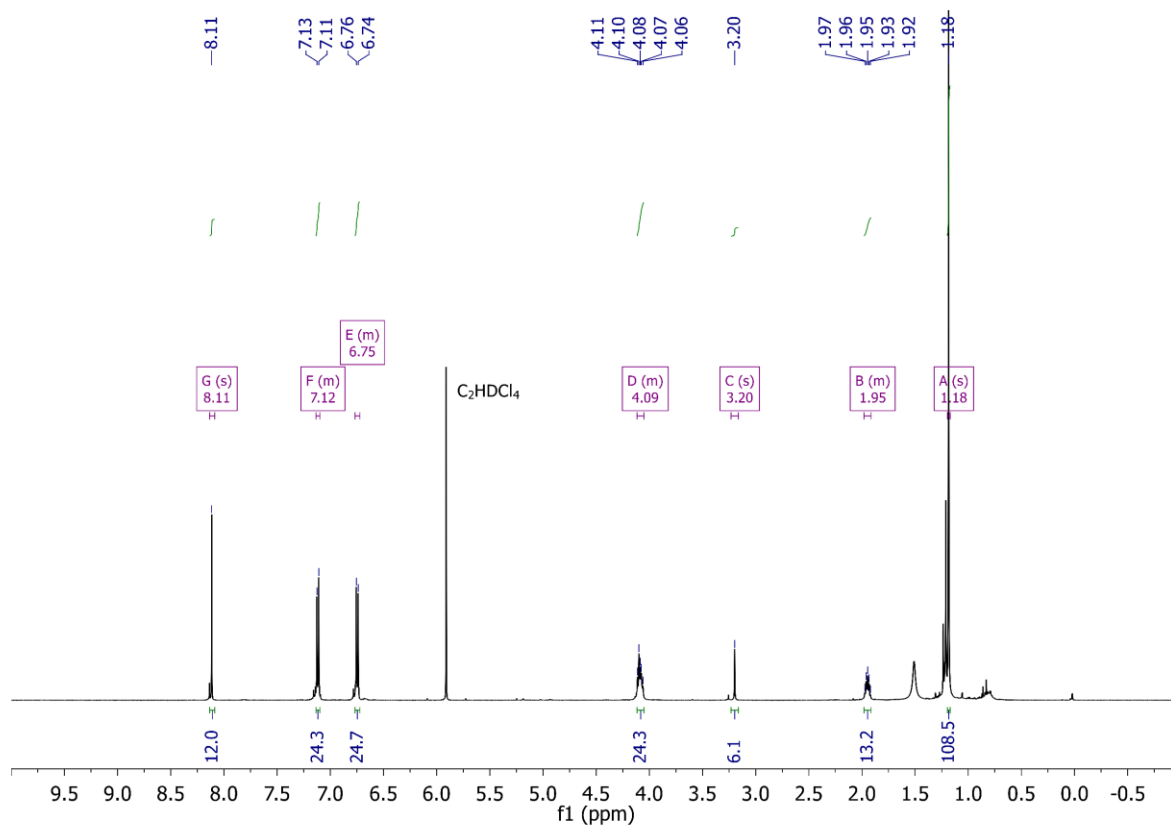

Figure S16. <sup>1</sup>H NMR (500 MHz, C<sub>2</sub>D<sub>2</sub>Cl<sub>4</sub>, 60 °C) spectrum of macrocycle **P3**.

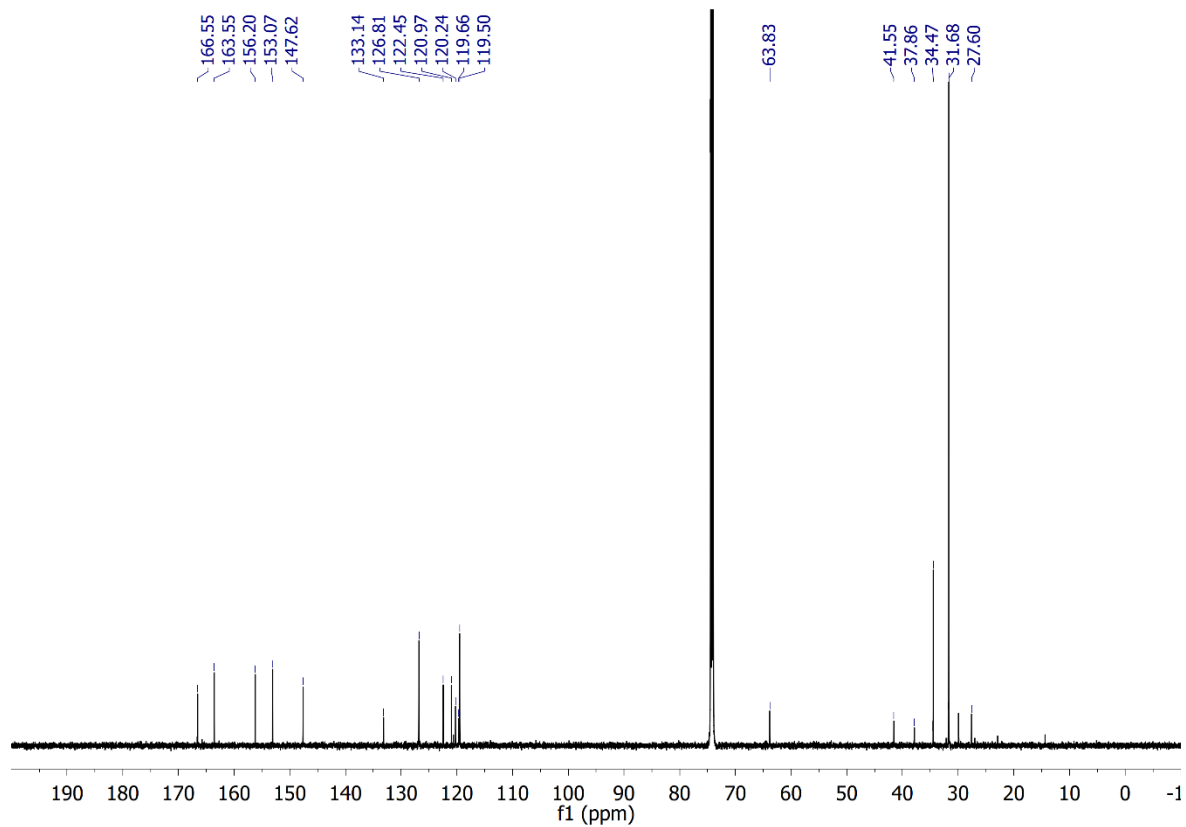

Figure S17. <sup>13</sup>C NMR (126 MHz, C<sub>2</sub>D<sub>2</sub>Cl<sub>4</sub>, 60 °C) spectrum of macrocycle **P3**.



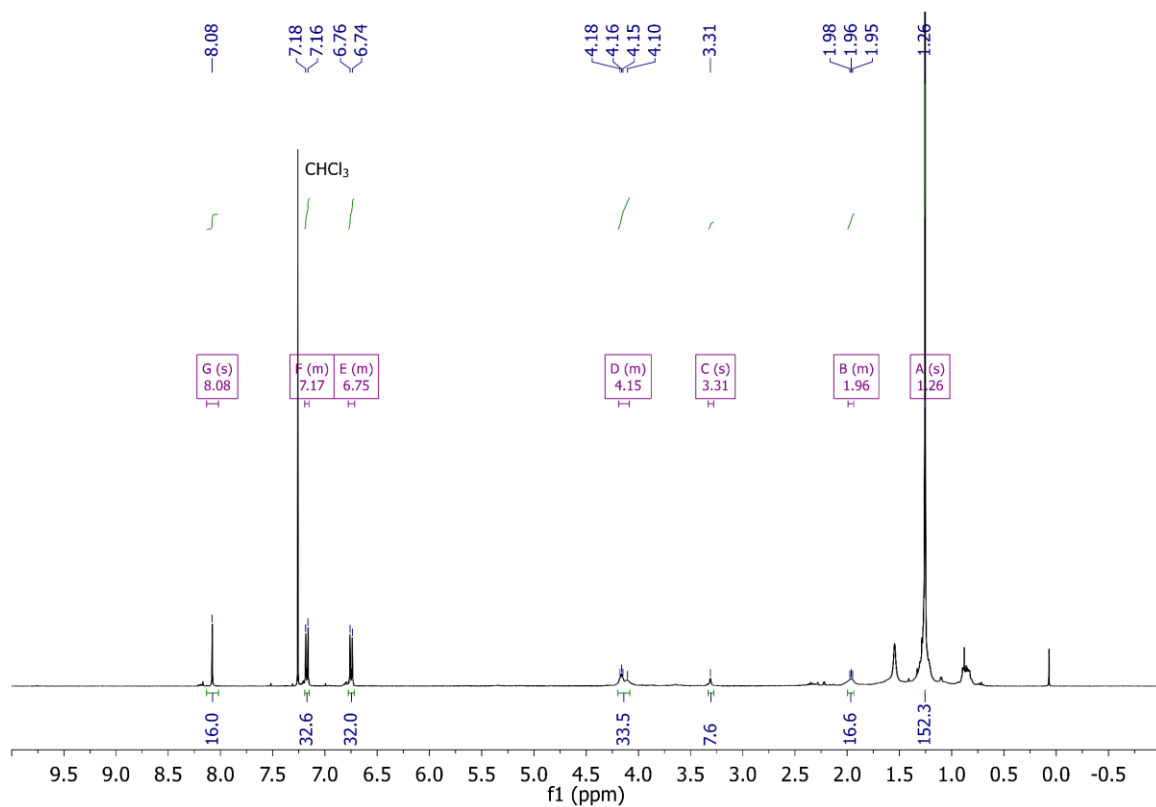

**Figure S18.** <sup>1</sup>H NMR (400 MHz, CDCl<sub>3</sub>, rt) spectrum of macrocycle **P4**.

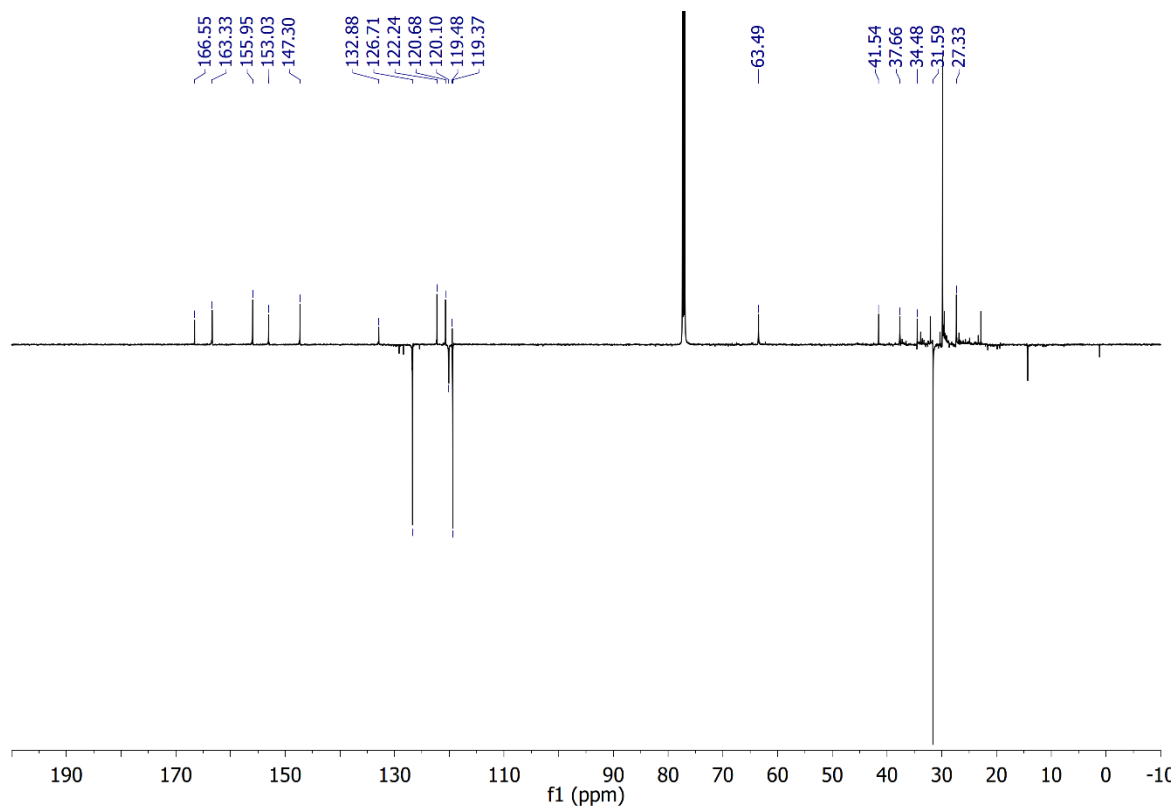

**Figure S19.** DEPTQ NMR (151 MHz, CDCl<sub>3</sub>, rt) spectrum of macrocycle **P4**.

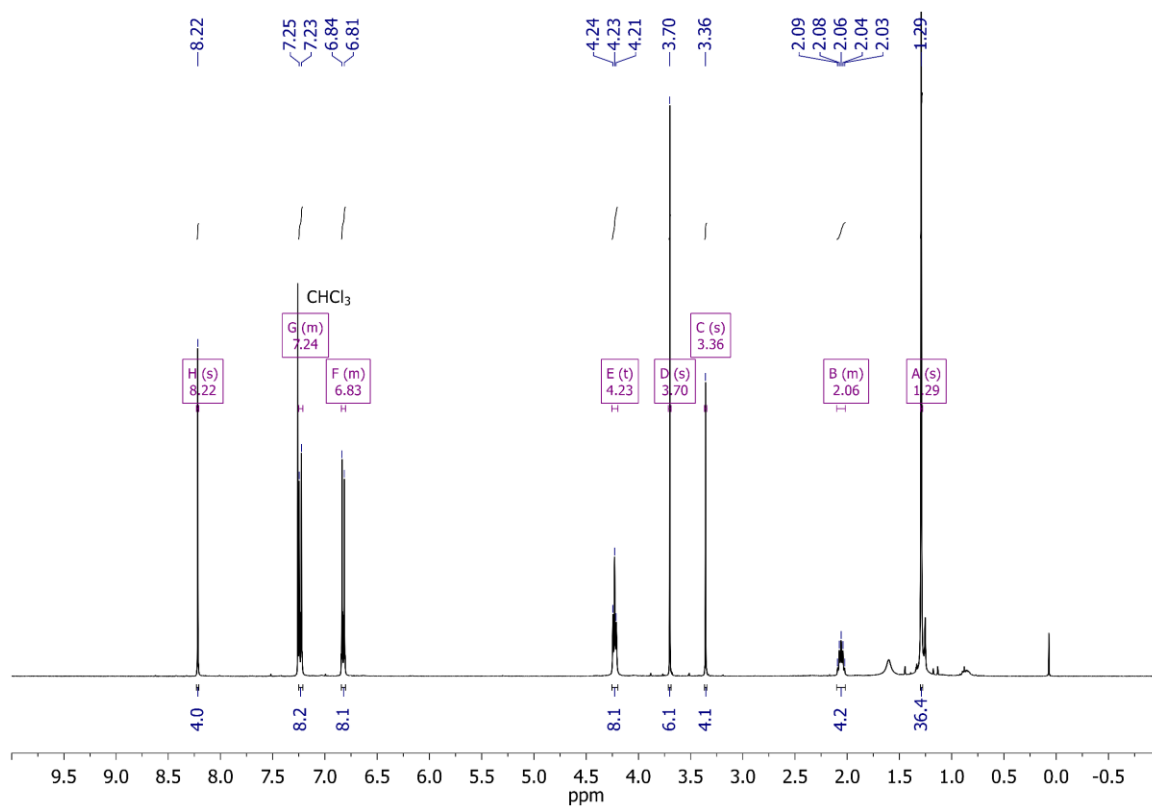

Figure S20. <sup>1</sup>H NMR (400 MHz, CDCl<sub>3</sub>, rt) spectrum of precursor **P1**.

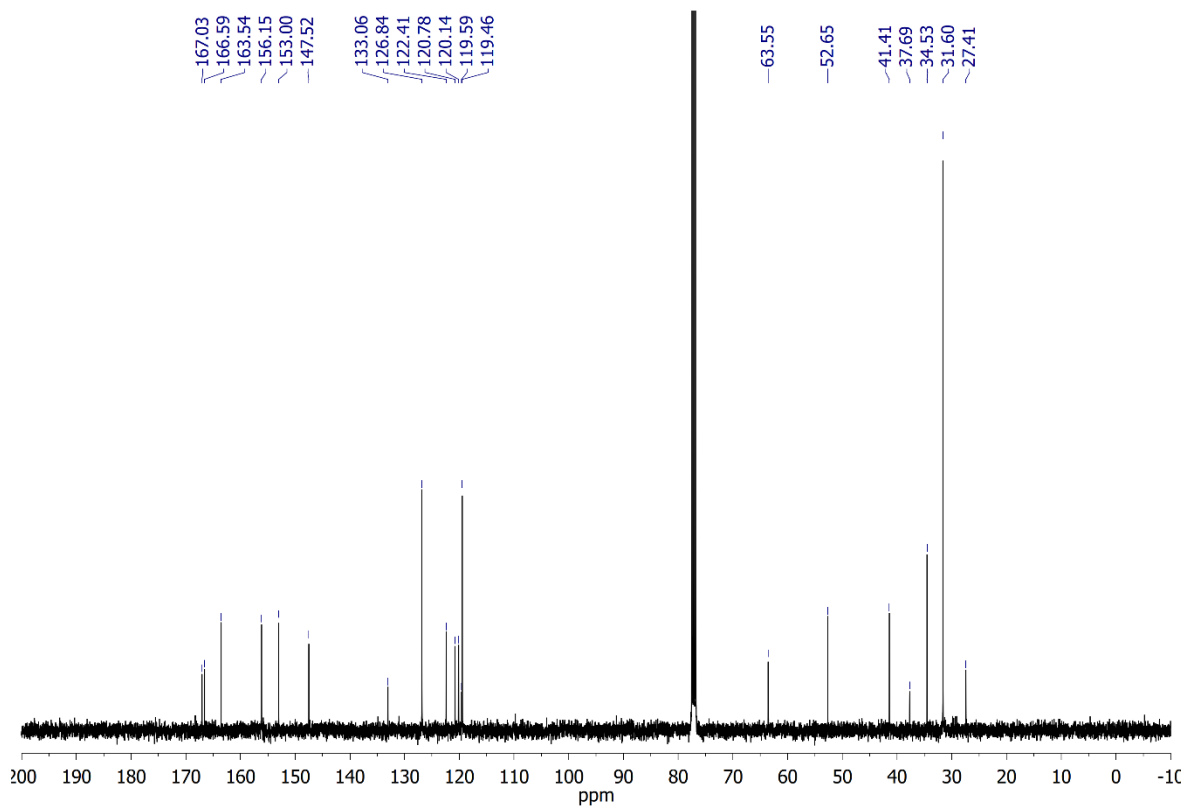

Figure S21. <sup>13</sup>C NMR (101 MHz, CDCl<sub>3</sub>, rt) spectrum of model precursor **P1**.

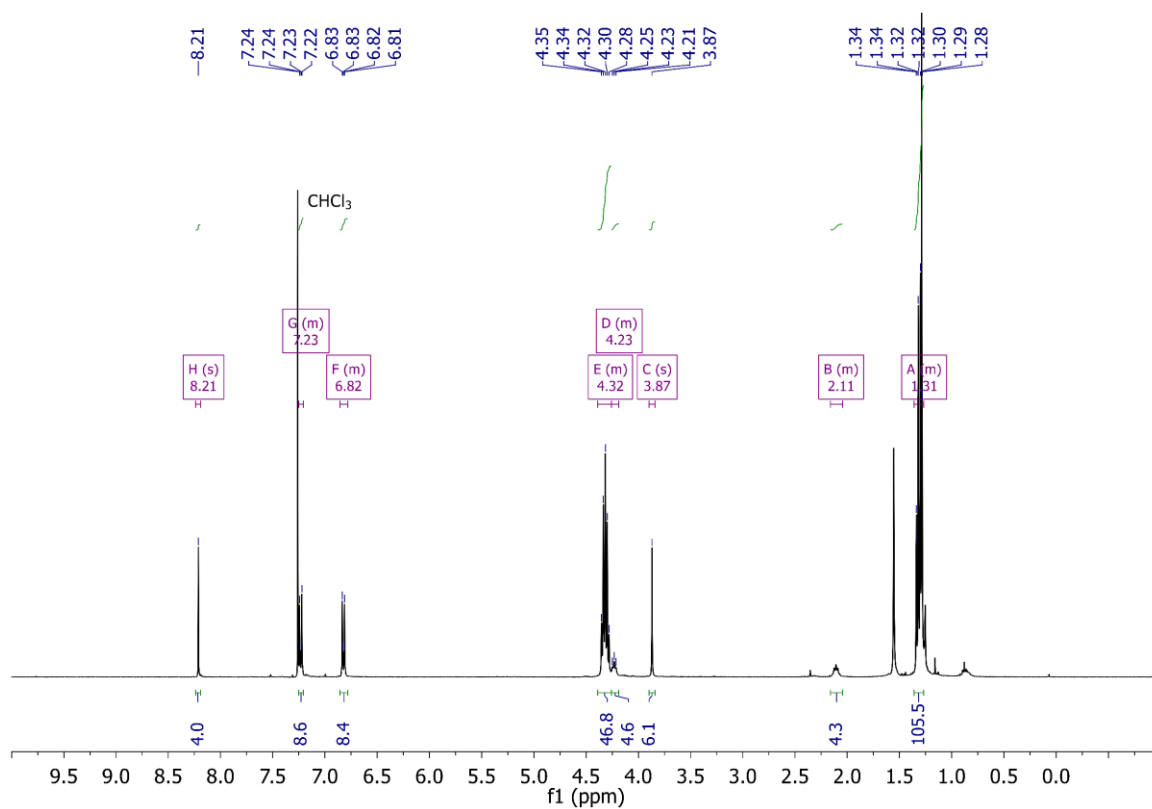

Figure S22.  $^1\text{H}$  NMR (400 MHz,  $\text{CDCl}_3$ , rt) spectrum of model compound **P1F2Et**.

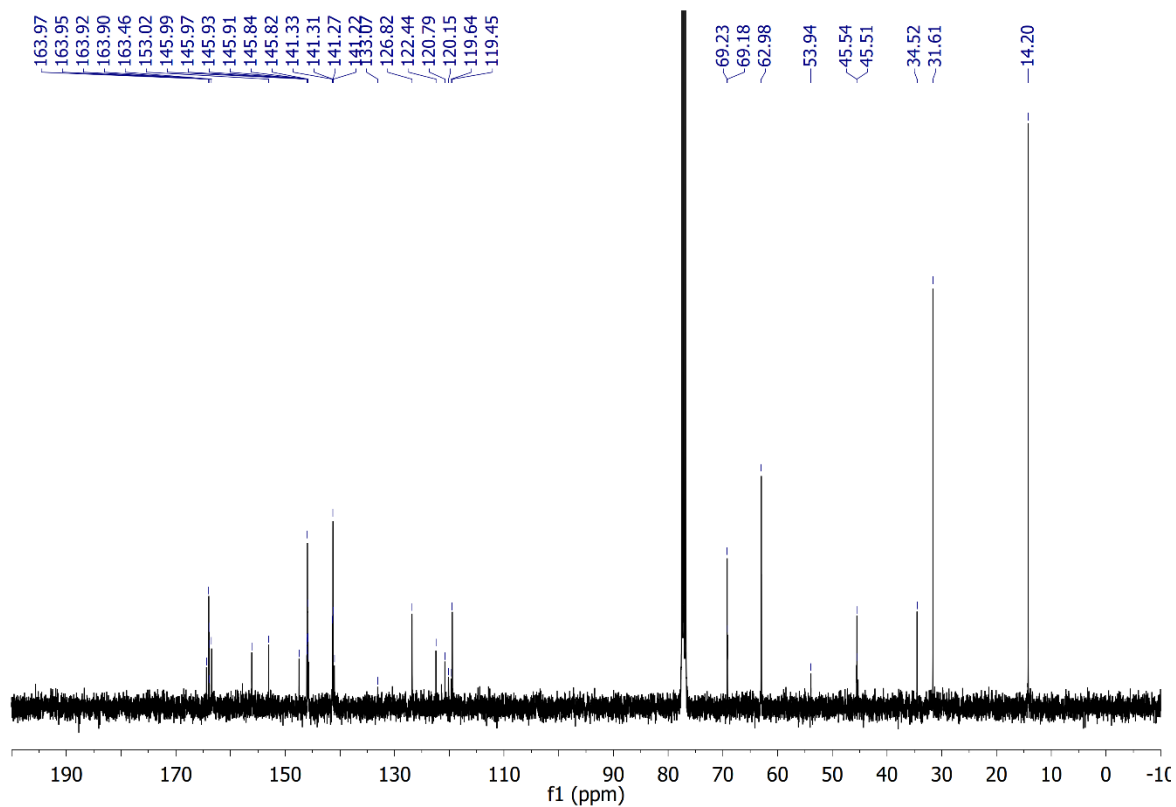

Figure S23.  $^{13}\text{C}$  NMR (151 MHz,  $\text{CDCl}_3$ , rt) spectrum of model compound **P1F2Et**.

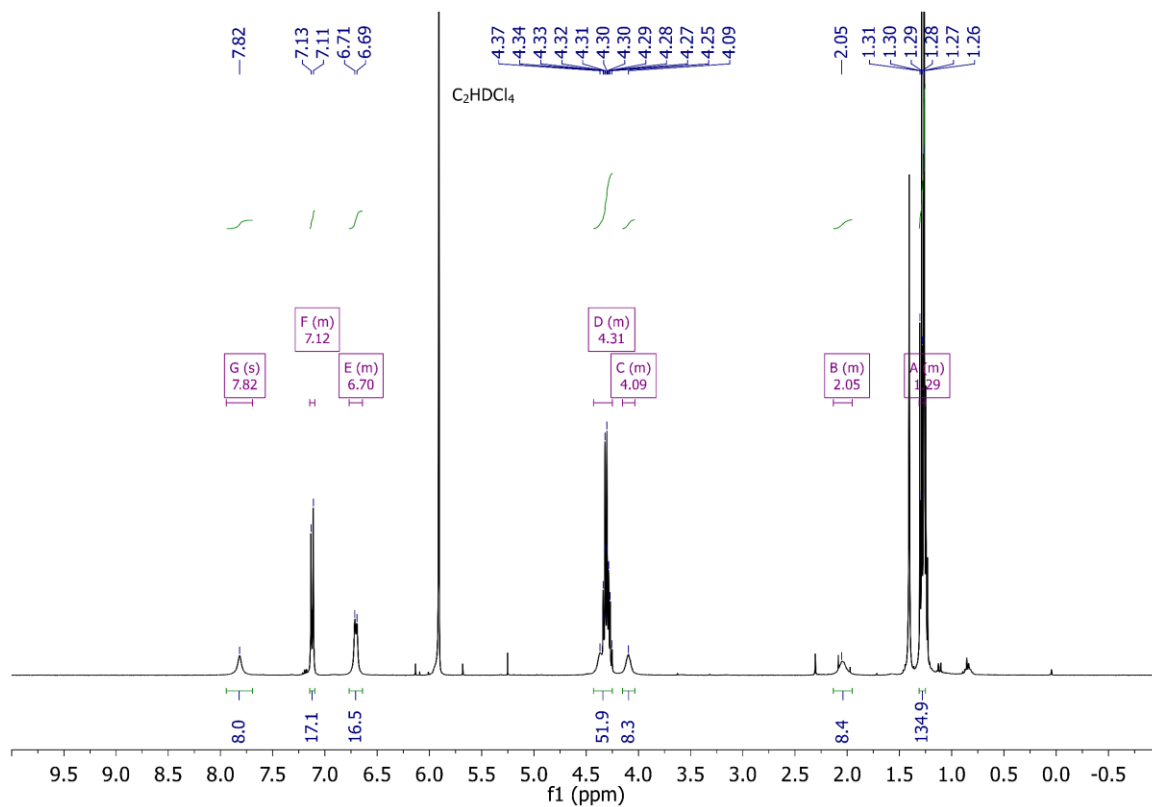

**Figure S24.**  $^1\text{H}$  NMR (400 MHz,  $\text{C}_2\text{D}_2\text{Cl}_4$ , 90 °C) spectrum of the functional hybrid **P2F2Et**.

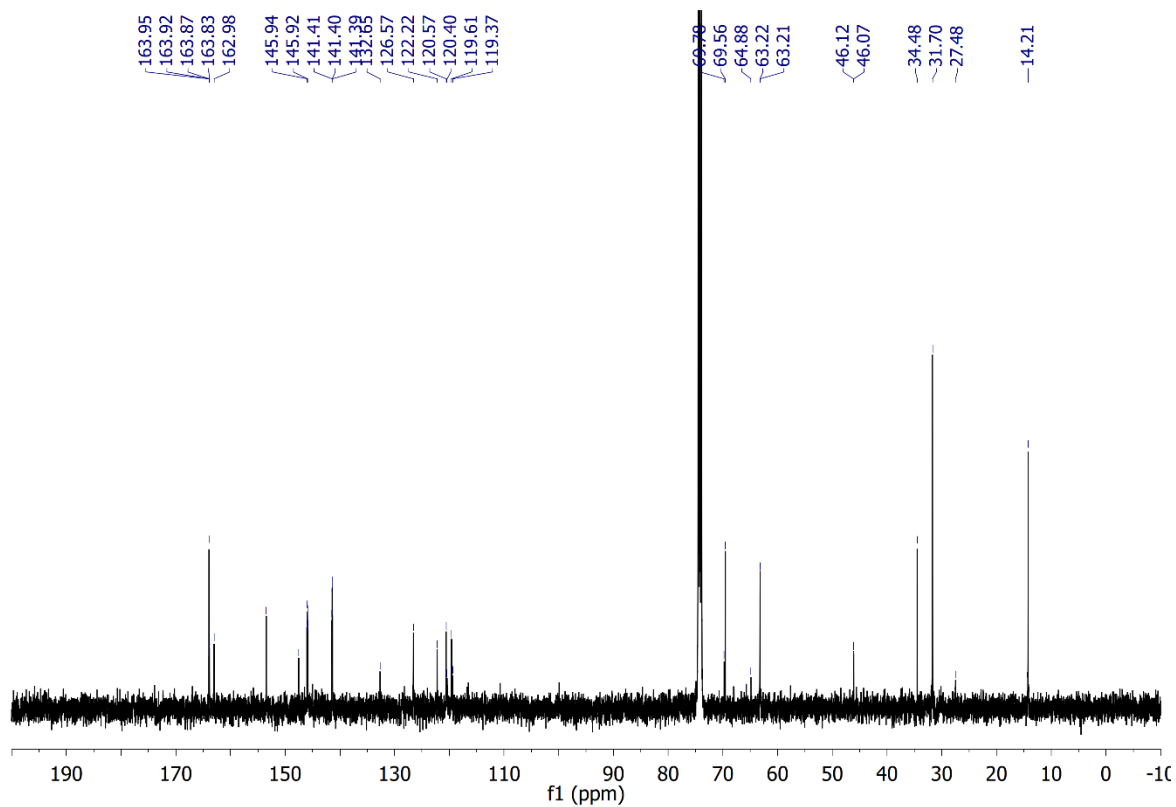

**Figure S25.**  $^{13}\text{C}$  NMR (101 MHz,  $\text{C}_2\text{D}_2\text{Cl}_4$ , 90 °C) spectrum of the functional hybrid **P2F2Et**.

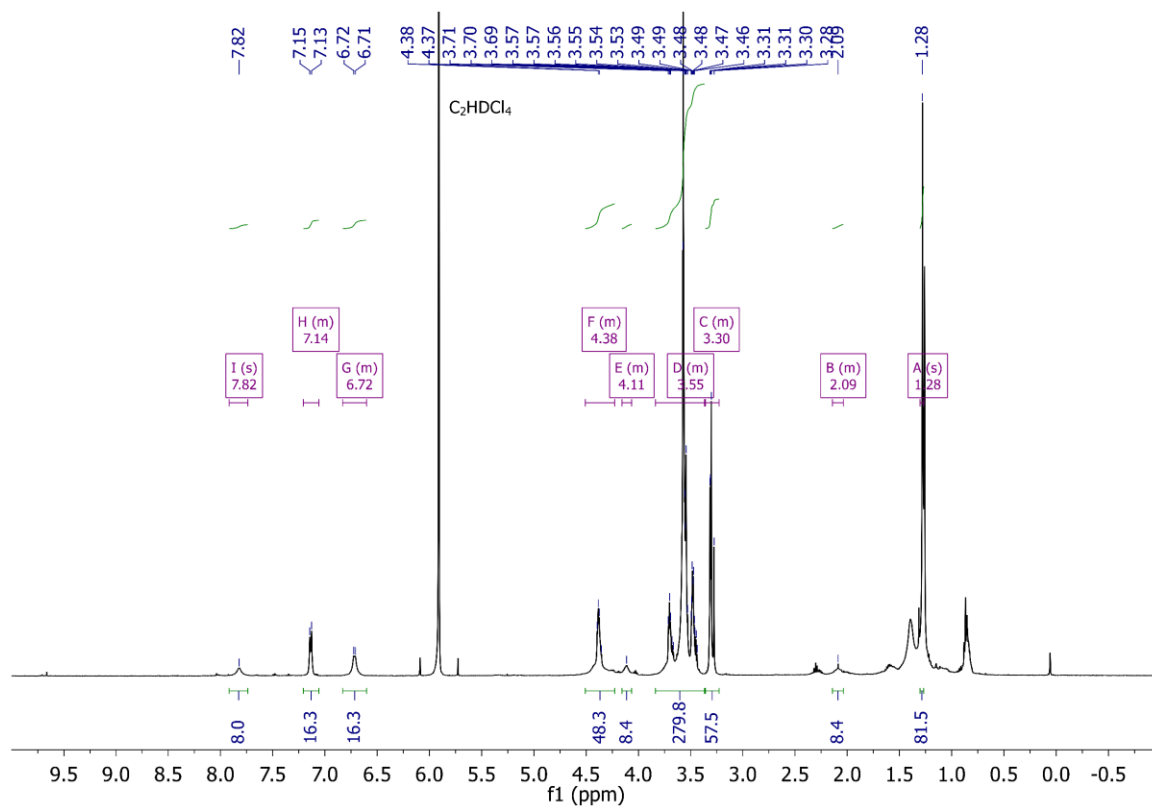

Figure S26.  $^1\text{H}$  NMR (500 MHz,  $\text{C}_2\text{D}_2\text{Cl}_4$ , 110  $^\circ\text{C}$ ) spectrum of the functional hybrid **P2F2TEG**.

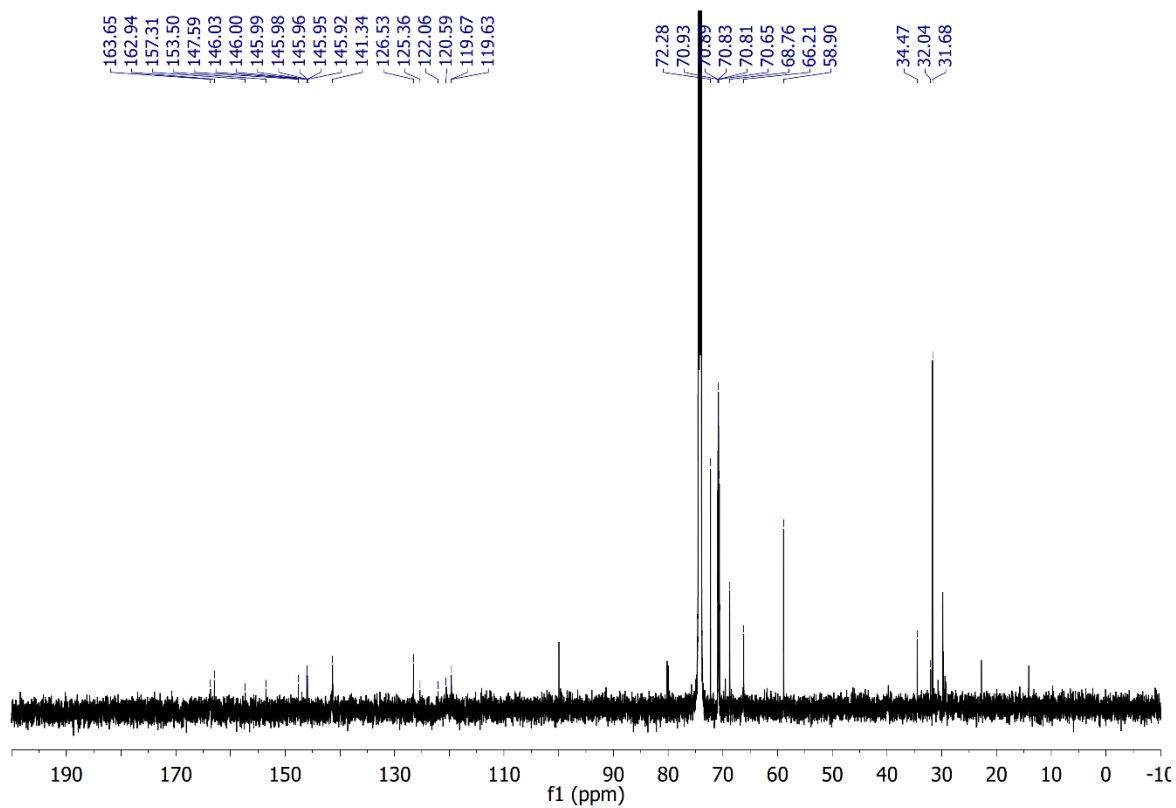

Figure S27.  $^{13}\text{C}$  NMR (126 MHz,  $\text{C}_2\text{D}_2\text{Cl}_4$ , 110  $^\circ\text{C}$ ) spectrum of the functional hybrid **P2F2TEG**.

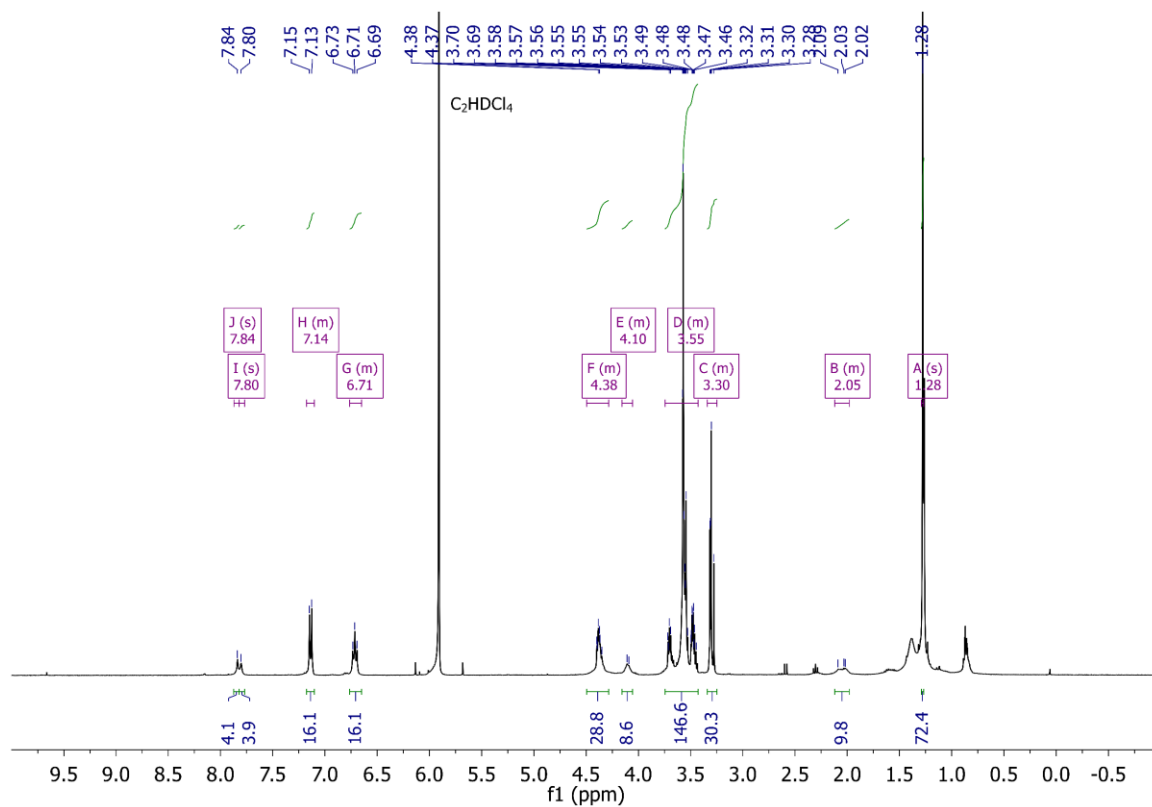

**Figure S28.** <sup>1</sup>H NMR (500 MHz, C<sub>2</sub>D<sub>2</sub>Cl<sub>4</sub>, 110 °C) spectrum of the functional hybrid **P2F1**<sub>TEG</sub>.

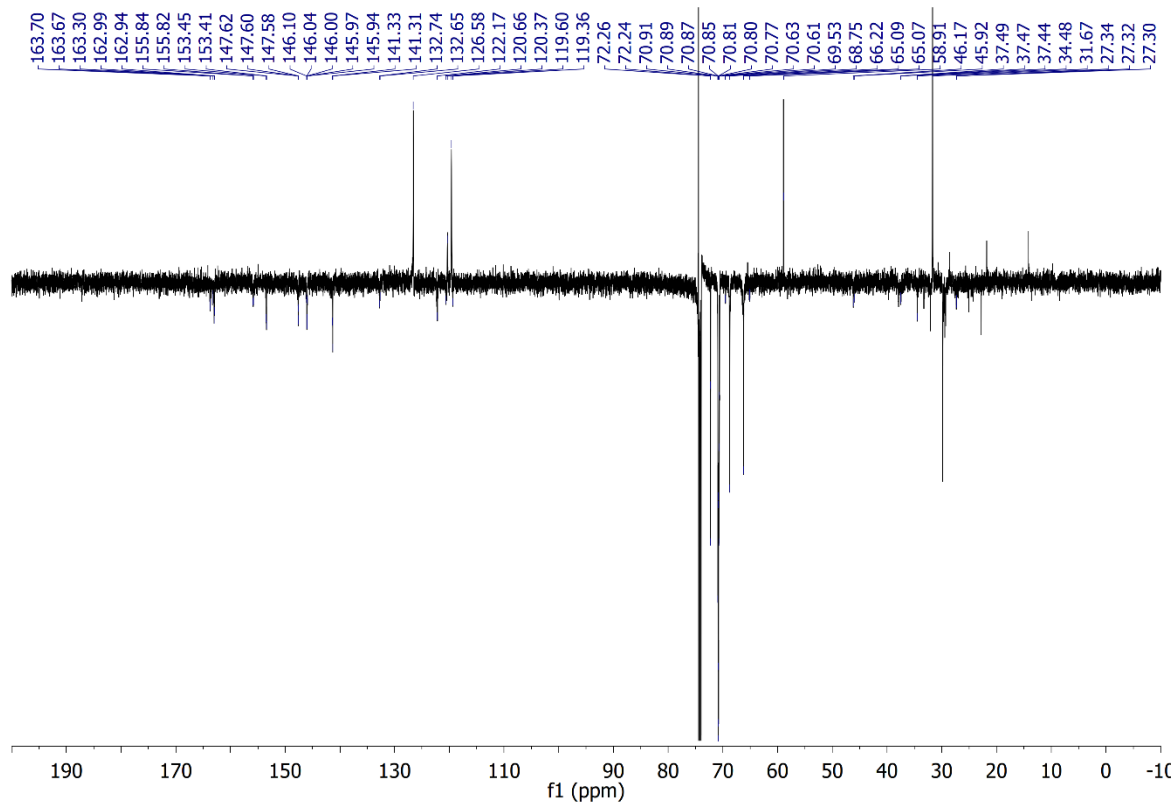

**Figure S29.** DEPTQ NMR (126 MHz, C<sub>2</sub>D<sub>2</sub>Cl<sub>4</sub>, 110 °C) spectrum of the functional hybrid **P2F1**<sub>TEG</sub>.

## 7. MS spectra

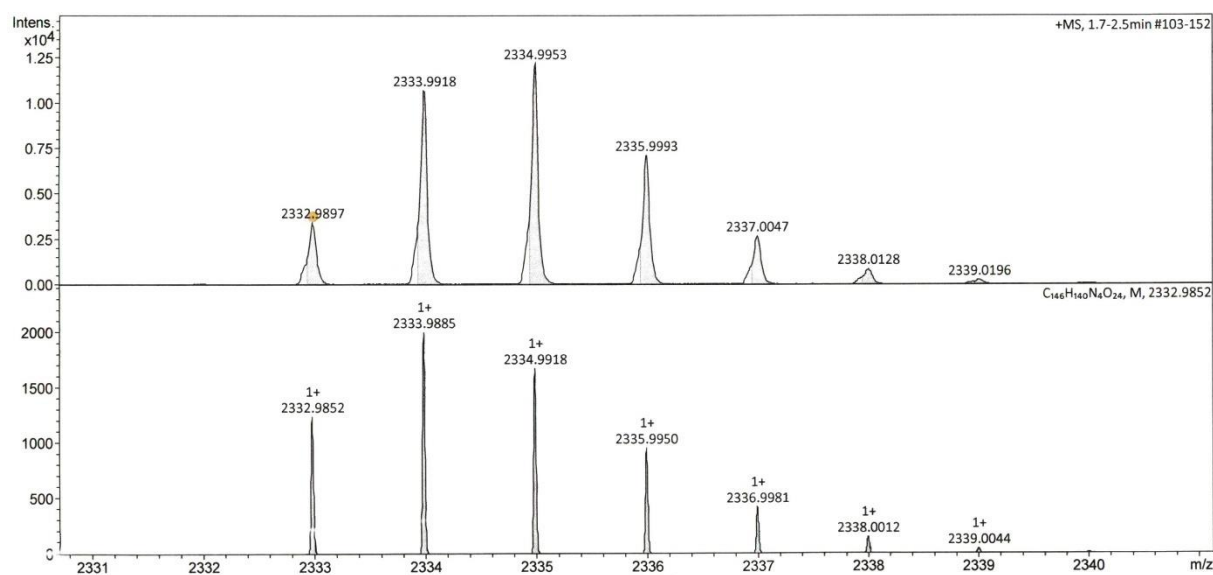

Figure S30. APPI HRMS spectrum of macrocycle P2.

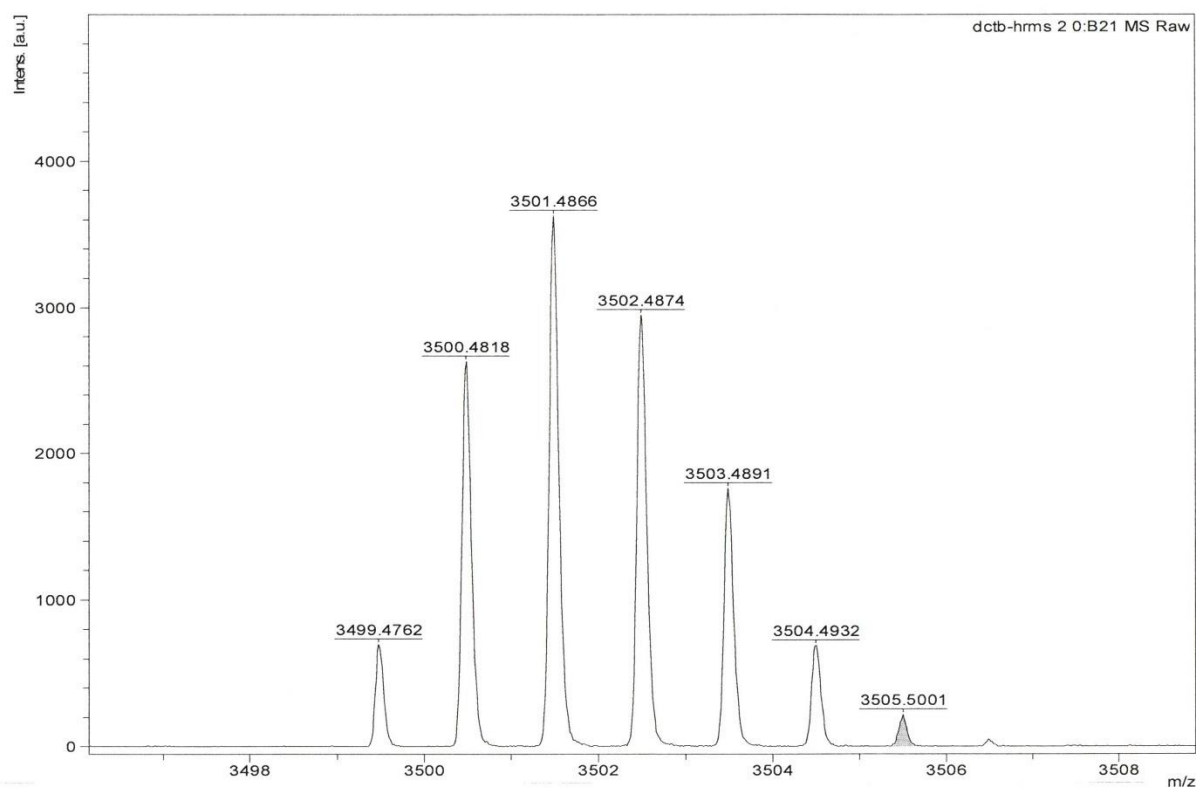

Figure S31. MALDI HRMS spectrum of macrocycle P3.

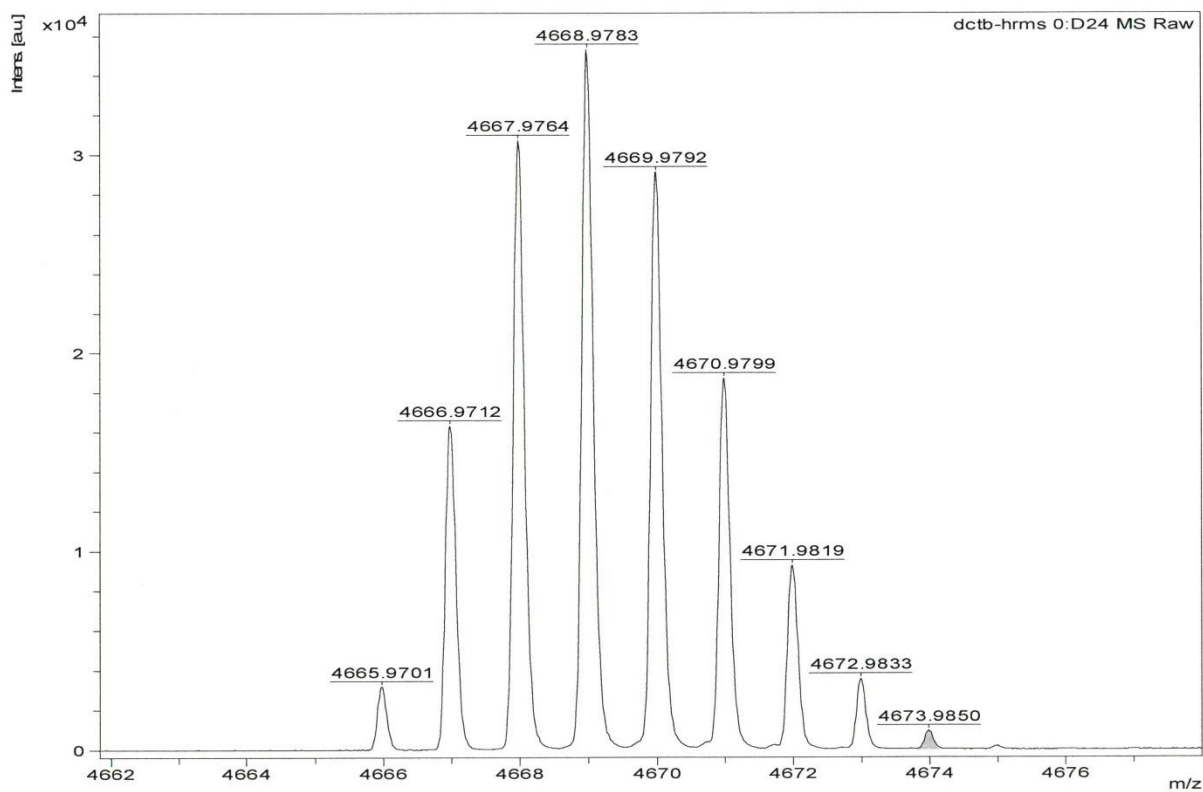

Figure S32. MALDI HRMS spectrum of macrocycle P4.

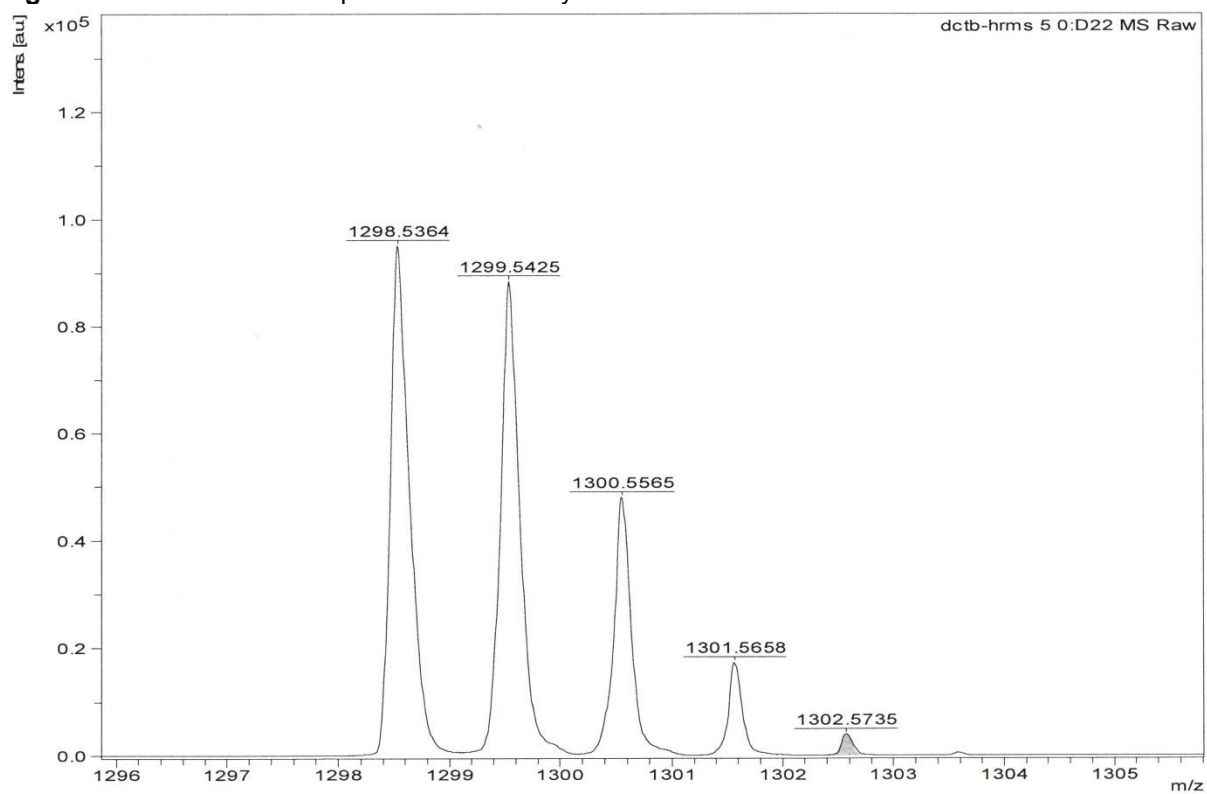

Figure S33. MALDI HRMS spectrum of precursor P1.



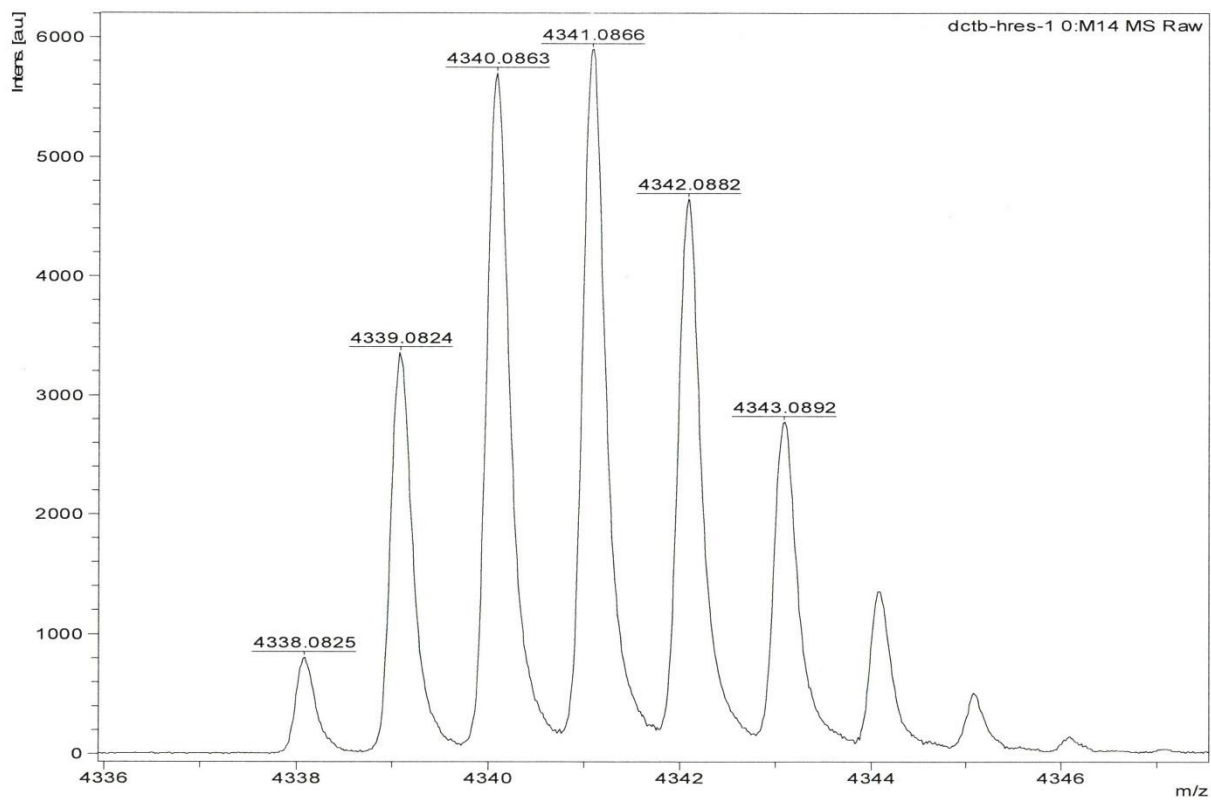

Figure S34. MALDI HRMS spectrum of model compound P1F2Et.

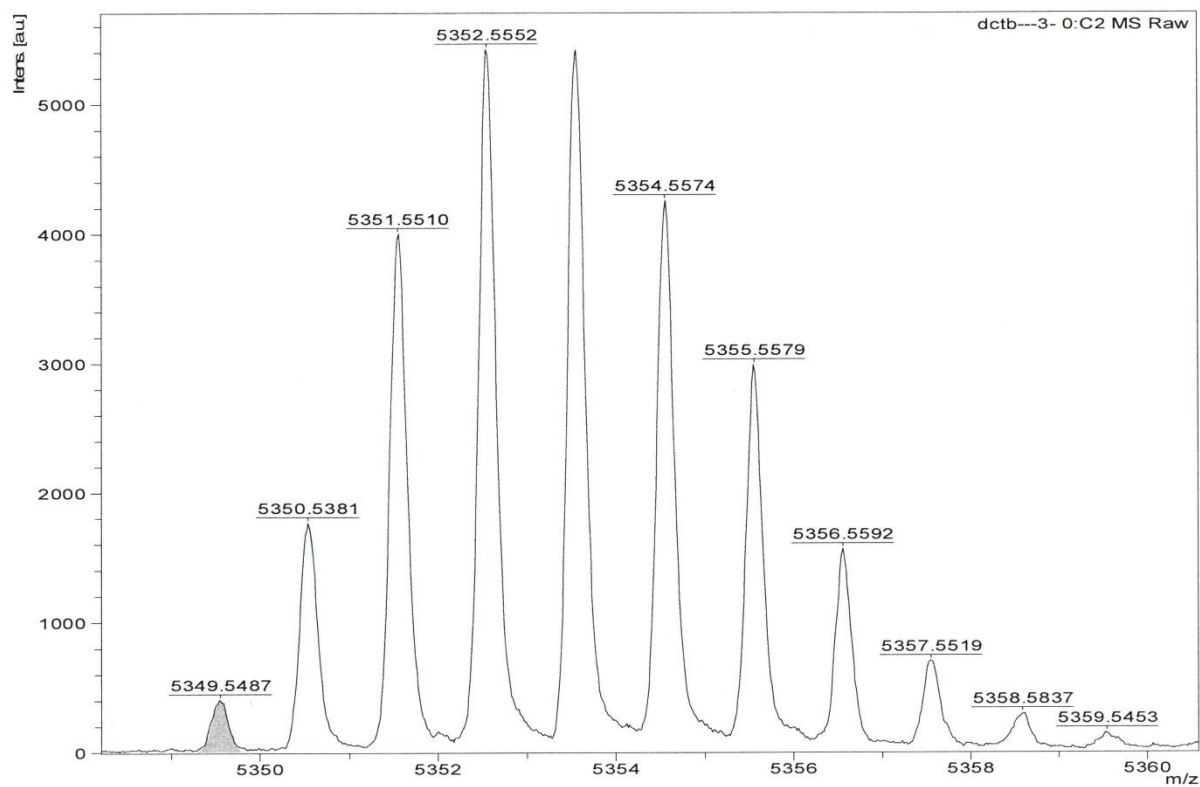

Figure S35. MALDI HRMS spectrum of functional hybrid P2F2Et.

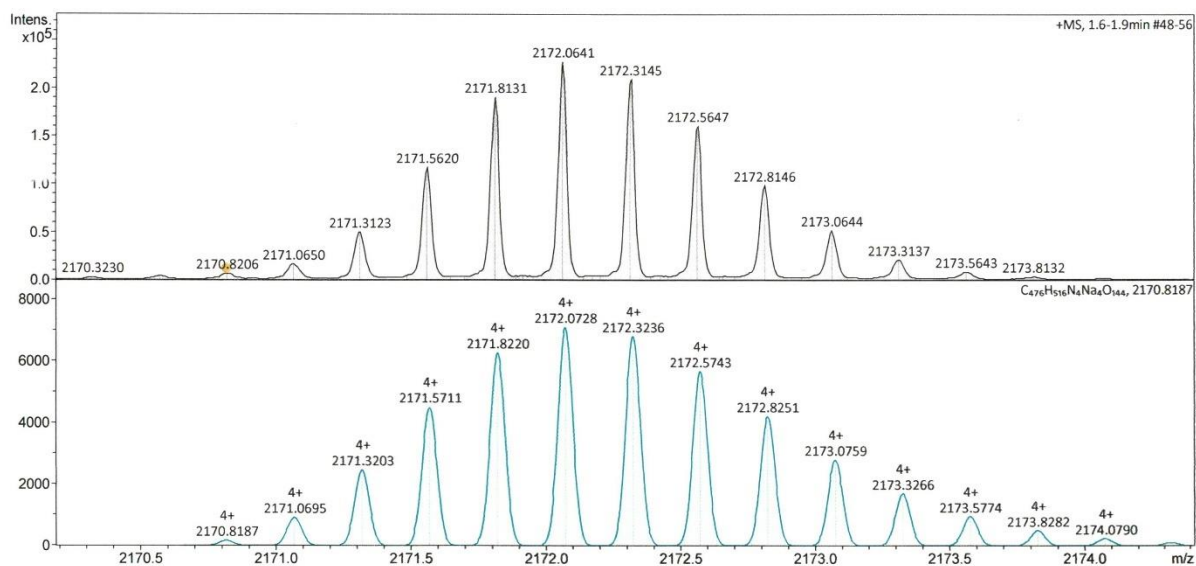

**Figure S36.** ESI HRMS spectrum of functional hybrid **P2F2**<sub>TEG</sub>.

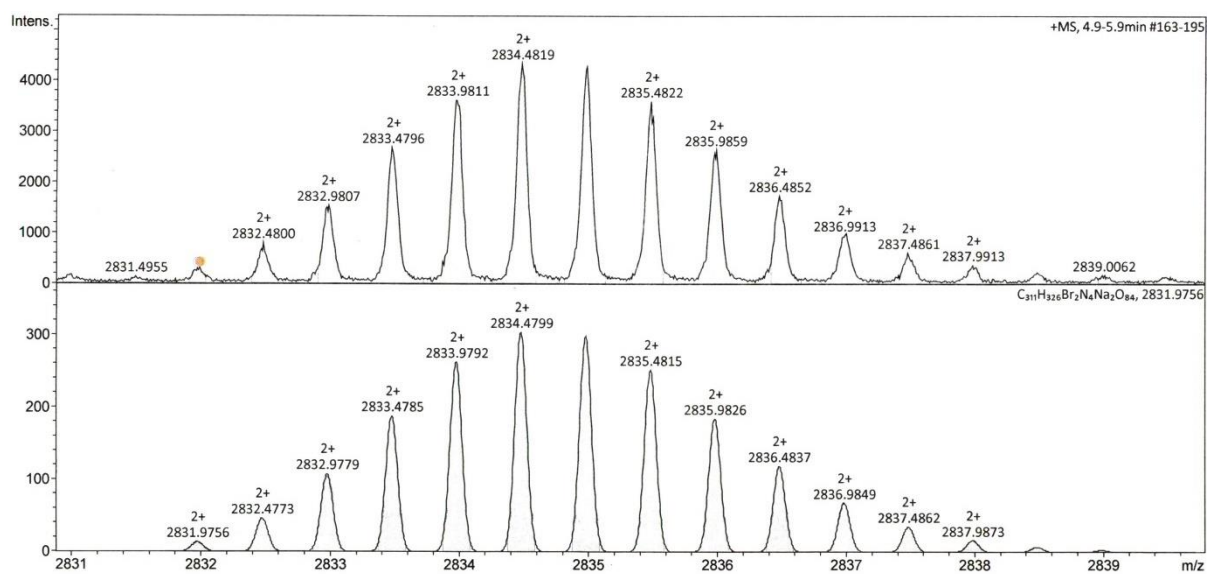

**Figure S37.** APPI HRMS spectrum of side product **P2F1**<sub>TEG</sub>.

## 8. UV-Vis absorption spectroscopy

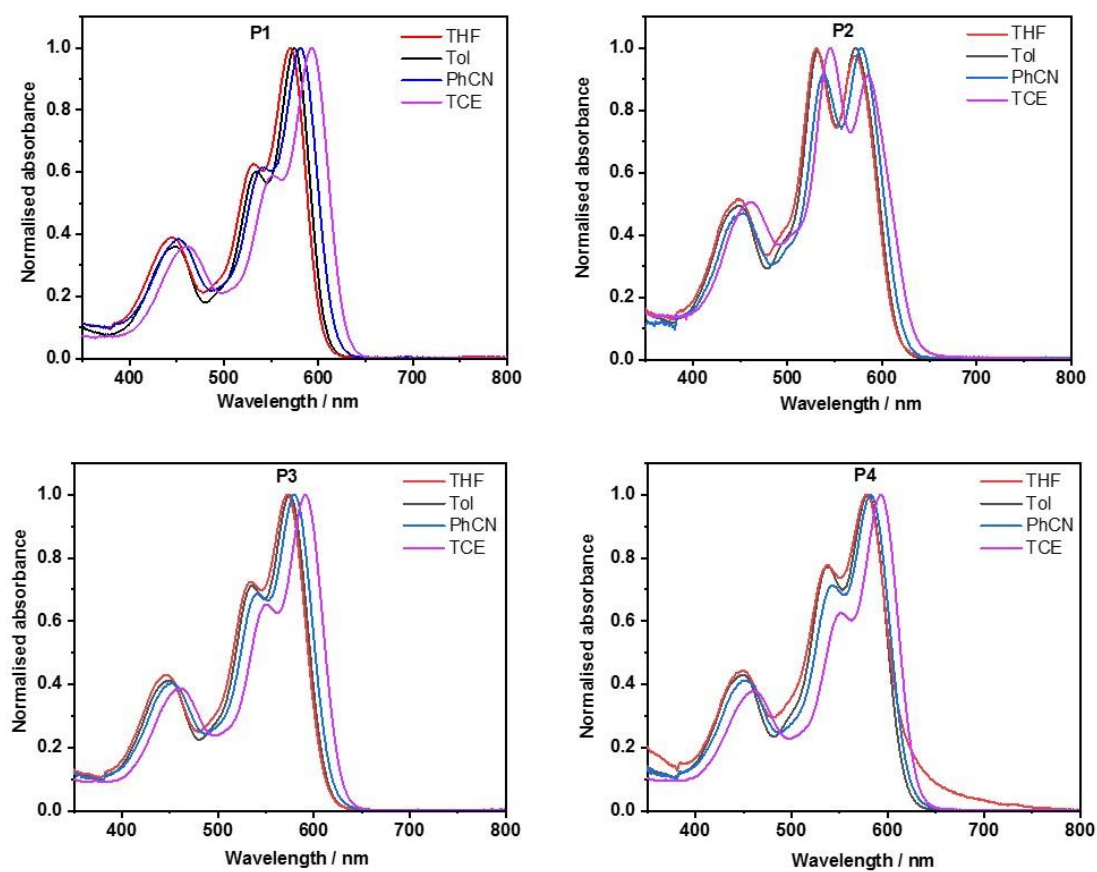

**Figure S38.** Normalized absorption spectra of **P1**, **P2**, **P3**, and **P4** in tetrahydrofuran, toluene, benzonitrile, and 1,1,2,2-tetrachloroethane measured at room temperature.

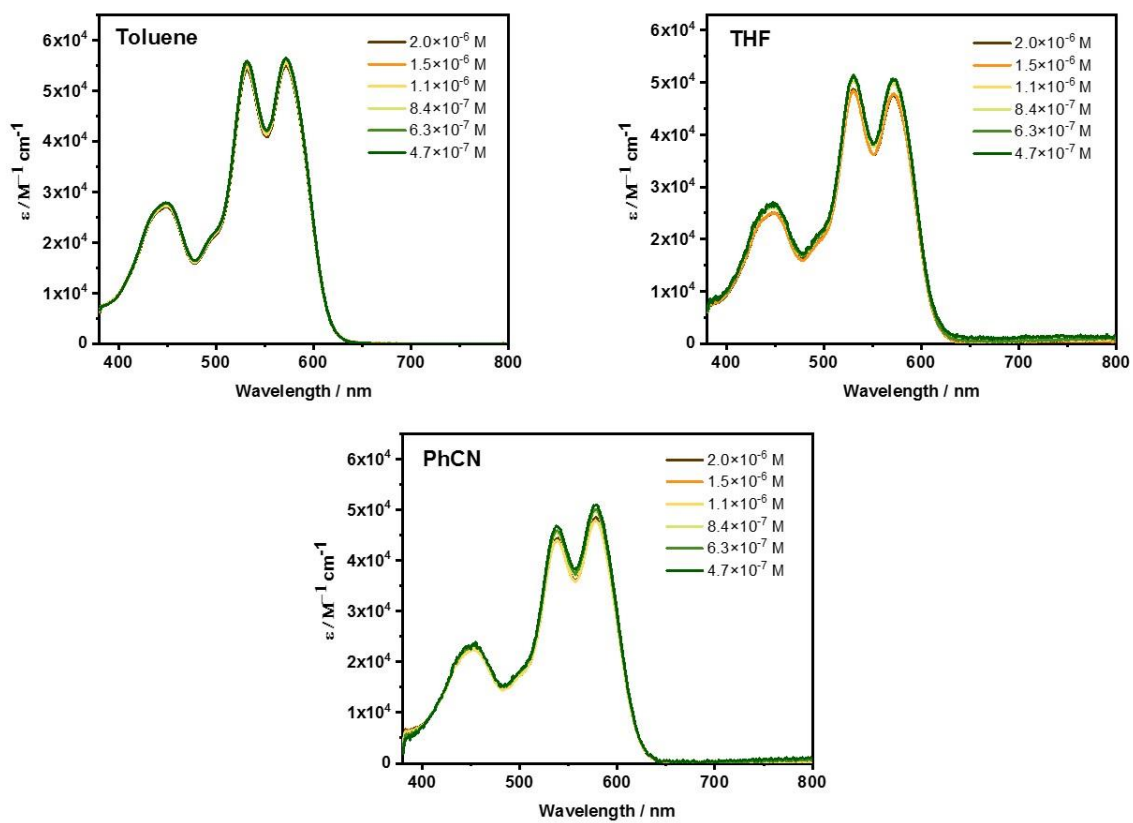

**Figure S39.** Absorption spectra of cyclophane **P2** at different concentrations in toluene, tetrahydrofuran and benzonitrile measured at room temperature.

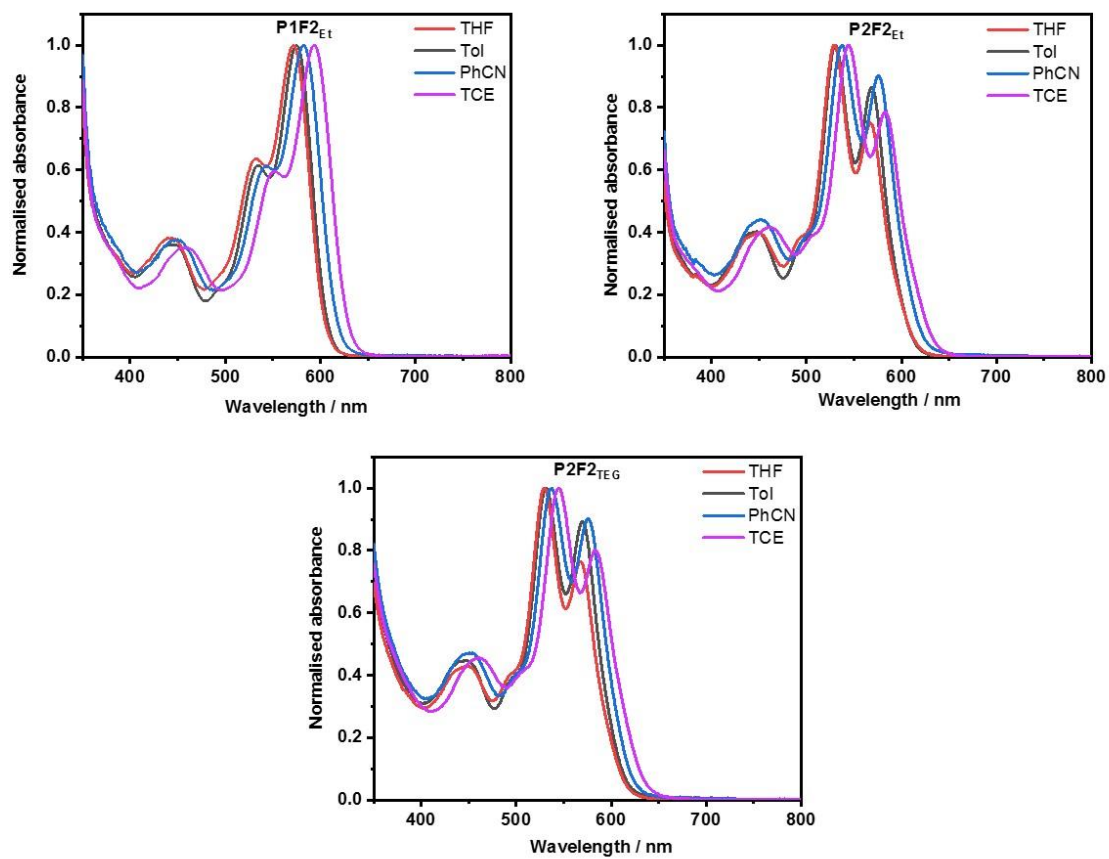

**Figure S40.** Normalized absorption spectra of **P1F2<sub>Et</sub>**, **P2F2<sub>Et</sub>**, and **P2F2<sub>TEG</sub>** in tetrahydrofuran, toluene, benzonitrile, and 1,1,2,2-tetrachloroethane measured at room temperature.

**Table S2.** The peak wavelengths (in nm) for 0<sup>-</sup>\*0 and 0<sup>-</sup>\*1 vibrational transitions, molar extinction coefficient at the peak positions (in M<sup>-1</sup> cm<sup>-1</sup>) and the 0<sup>-</sup>\*1 : 0<sup>-</sup>\*0 transition intensity ratios for all the samples in different solvents, measured at room temperature.

| Sample                    |                                                | Toluene             |                     | THF                 |                     | Benzonitrile        |                     | 5% THF/water        |                     |
|---------------------------|------------------------------------------------|---------------------|---------------------|---------------------|---------------------|---------------------|---------------------|---------------------|---------------------|
|                           |                                                | 0 <sup>-</sup> *1   | 0 <sup>-</sup> *0   |
| <b>P1</b>                 | Peak position (nm)                             | 534                 | 575                 | 531                 | 570                 | 541                 | 580                 |                     |                     |
|                           | $\epsilon$ (M <sup>-1</sup> cm <sup>-1</sup> ) | 2.6×10 <sup>4</sup> | 4.4×10 <sup>4</sup> | 2.4×10 <sup>4</sup> | 3.8×10 <sup>4</sup> | 2.4×10 <sup>4</sup> | 3.8×10 <sup>4</sup> |                     |                     |
|                           | 0 <sup>-</sup> *1 : 0 <sup>-</sup> *0          | 0.60 : 1            |                     | 0.63 : 1            |                     | 0.62 : 1            |                     |                     |                     |
| <b>P2</b>                 | Peak position (nm)                             | 532                 | 572                 | 530.5               | 571.5               | 539                 | 578                 |                     |                     |
|                           | $\epsilon$ (M <sup>-1</sup> cm <sup>-1</sup> ) | 5.6×10 <sup>4</sup> | 5.6×10 <sup>4</sup> | 4.8×10 <sup>4</sup> | 4.7×10 <sup>4</sup> | 4.4×10 <sup>4</sup> | 4.8×10 <sup>4</sup> |                     |                     |
|                           | 0 <sup>-</sup> *1 : 0 <sup>-</sup> *0          | 0.99 : 1            |                     | 1.03 : 1            |                     | 0.92 : 1            |                     |                     |                     |
| <b>P3</b>                 | Peak position (nm)                             | 535.5               | 574.5               | 534                 | 572                 | 541.5               | 579.5               |                     |                     |
|                           | $\epsilon$ (M <sup>-1</sup> cm <sup>-1</sup> ) | 3.4×10 <sup>4</sup> | 4.8×10 <sup>4</sup> | 1.1×10 <sup>5</sup> | 1.5×10 <sup>5</sup> | 8.2×10 <sup>4</sup> | 1.2×10 <sup>5</sup> |                     |                     |
|                           | 0 <sup>-</sup> *1 : 0 <sup>-</sup> *0          | 0.71 : 1            |                     | 0.72 : 1            |                     | 0.69 : 1            |                     |                     |                     |
| <b>P4</b>                 | Peak position (nm)                             | 538                 | 579.5               | 538                 | 577.5               | 543                 | 582                 |                     |                     |
|                           | $\epsilon$ (M <sup>-1</sup> cm <sup>-1</sup> ) | 2.6×10 <sup>4</sup> | 3.3×10 <sup>4</sup> | 3.4×10 <sup>4</sup> | 4.4×10 <sup>4</sup> | 4.7×10 <sup>4</sup> | 6.6×10 <sup>4</sup> |                     |                     |
|                           | 0 <sup>-</sup> *1 : 0 <sup>-</sup> *0          | 0.77 : 1            |                     | 0.79 : 1            |                     | 0.71 : 1            |                     |                     |                     |
| <b>P1F2<sub>Et</sub></b>  | Peak position (nm)                             | 534                 | 575                 | 531.5               | 571.5               | 543                 | 582.5               |                     |                     |
|                           | $\epsilon$ (M <sup>-1</sup> cm <sup>-1</sup> ) | 2.1×10 <sup>4</sup> | 3.5×10 <sup>4</sup> | 2.5×10 <sup>4</sup> | 4.0×10 <sup>4</sup> | 2.2×10 <sup>4</sup> | 3.5×10 <sup>4</sup> |                     |                     |
|                           | 0 <sup>-</sup> *1 : 0 <sup>-</sup> *0          | 0.61 : 1            |                     | 0.54 : 1            |                     | 0.62 : 1            |                     |                     |                     |
| <b>P2F2<sub>Et</sub></b>  | Peak position (nm)                             | 530.5               | 568.5               | 529                 | 567                 | 537.5               | 576                 |                     |                     |
|                           | $\epsilon$ (M <sup>-1</sup> cm <sup>-1</sup> ) | 6.8×10 <sup>4</sup> | 5.9×10 <sup>4</sup> | 8.0×10 <sup>4</sup> | 6.0×10 <sup>4</sup> | 6.3×10 <sup>4</sup> | 5.7×10 <sup>4</sup> |                     |                     |
|                           | 0 <sup>-</sup> *1 : 0 <sup>-</sup> *0          | 1.16 : 1            |                     | 1.33 : 1            |                     | 1.11 : 1            |                     |                     |                     |
| <b>P2F2<sub>TEG</sub></b> | Peak position (nm)                             | 531                 | 569                 | 530                 | 568                 | 538                 | 576                 | 537                 | 577                 |
|                           | $\epsilon$ (M <sup>-1</sup> cm <sup>-1</sup> ) | 4.6×10 <sup>4</sup> | 4.2×10 <sup>4</sup> | 5.5×10 <sup>4</sup> | 4.2×10 <sup>4</sup> | 4.2×10 <sup>4</sup> | 3.8×10 <sup>4</sup> | 4.6×10 <sup>4</sup> | 3.6×10 <sup>4</sup> |
|                           | 0 <sup>-</sup> *1 : 0 <sup>-</sup> *0          | 1.12 : 1            |                     | 1.30 : 1            |                     | 1.10 : 1            |                     | 1.30 : 1            |                     |

## 9. Fluorescence spectroscopy

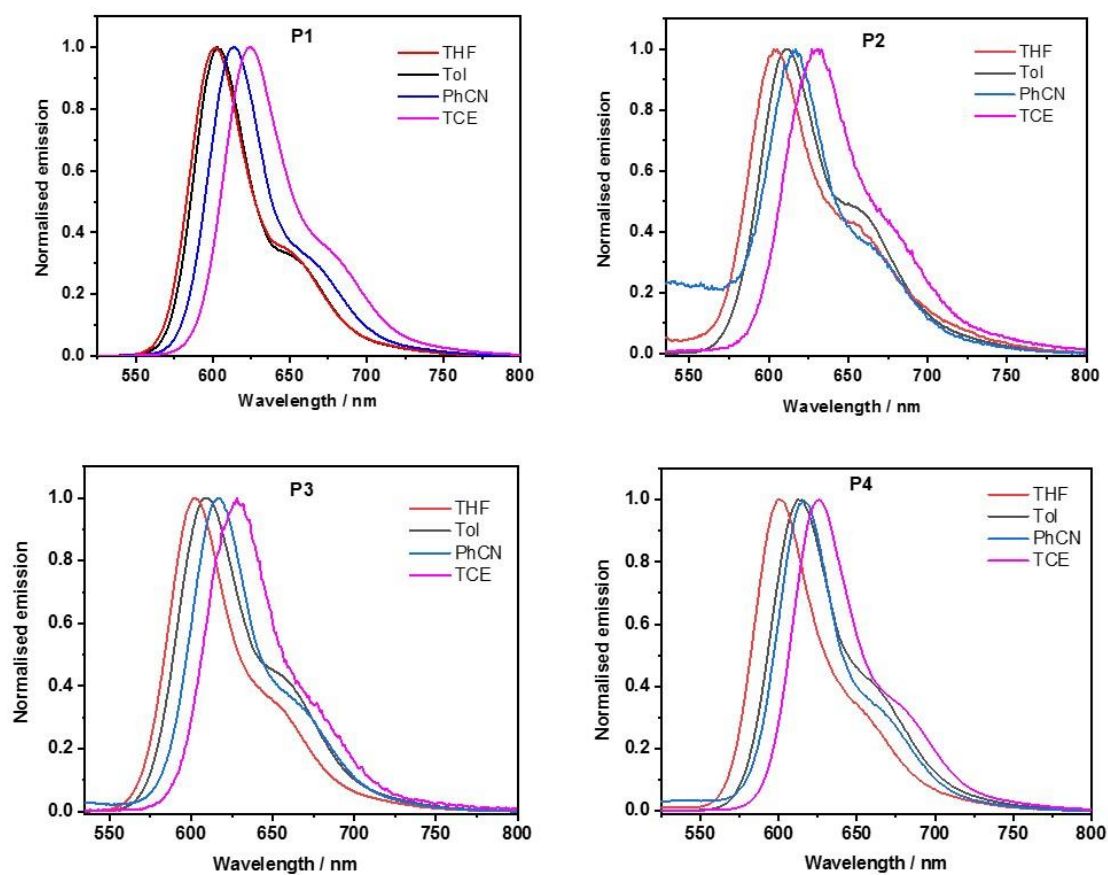

**Figure S41.** Normalized fluorescence spectra of **P1**, **P2**, **P3**, and **P4** in tetrahydrofuran, toluene, benzonitrile, and 1,1,2,2-tetrachloroethane obtained upon photo-excitation at 510 nm at room temperature.

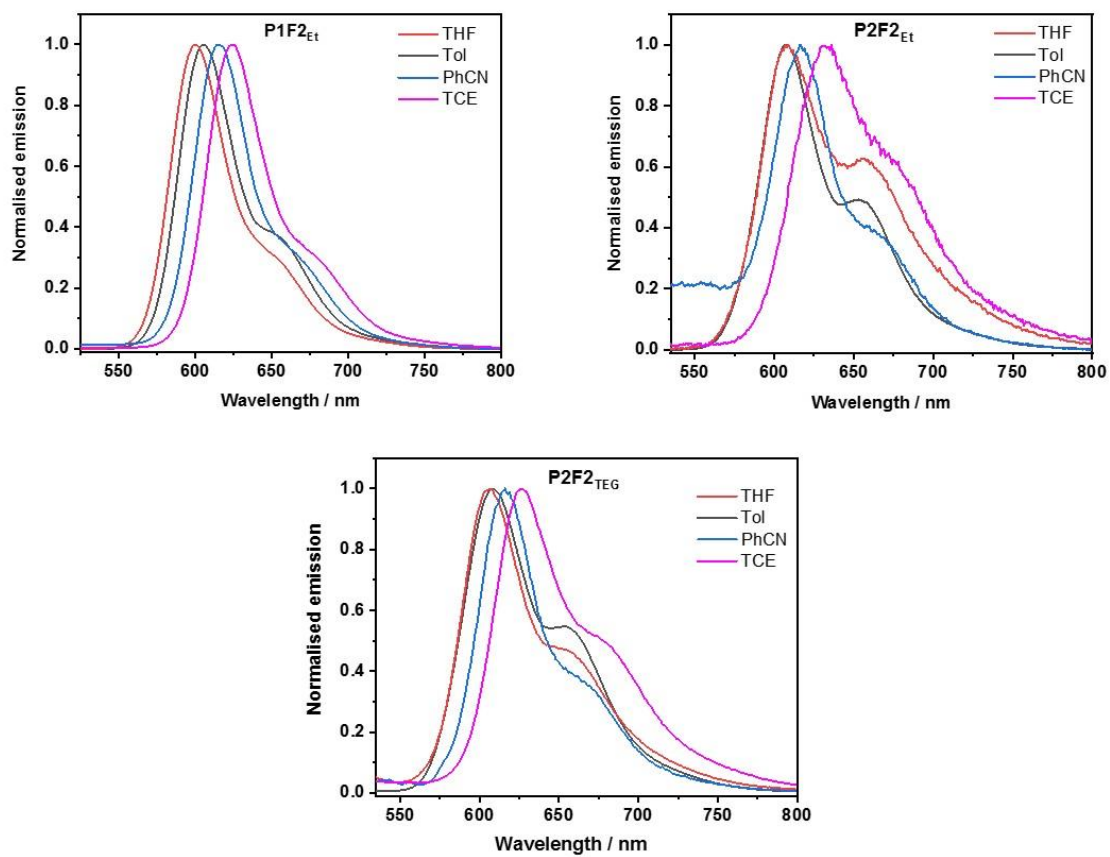

**Figure S42.** Normalized fluorescence spectra of **P1F2<sub>Et</sub>**, **P2F2<sub>Et</sub>**, and **P2F2<sub>TEG</sub>** in tetrahydrofuran, toluene, benzonitrile, and 1,1,2,2-tetrachloroethane obtained upon photo-excitation at 510 nm at room temperature.



**Table S3.** Fluorescence quantum yields measured in different solvents at room temperature (Rhodamine B in ethanol used as reference).

| <b>Emission quantum yield</b> | <b>Toluene</b> | <b>THF</b> | <b>Benzonitrile</b> | <b>5% THF/water</b> |
|-------------------------------|----------------|------------|---------------------|---------------------|
| <b>P1</b>                     | 0.904          | 0.792      | 0.722               | -                   |
| <b>P2</b>                     | 0.176          | 0.015      | 0.016               | -                   |
| <b>P3</b>                     | 0.254          | 0.085      | 0.118               | -                   |
| <b>P4</b>                     | 0.183          | 0.058      | 0.104               | -                   |
| <b>P1F2<sub>Et</sub></b>      | 0.391          | 0.536      | 0.531               | -                   |
| <b>P2F2<sub>Et</sub></b>      | 0.152          | 0.007      | 0.012               | -                   |
| <b>P2F2<sub>TEG</sub></b>     | 0.234          | 0.025      | 0.027               | 0.007               |

## 10. Temperature-dependent absorption and fluorescence spectra

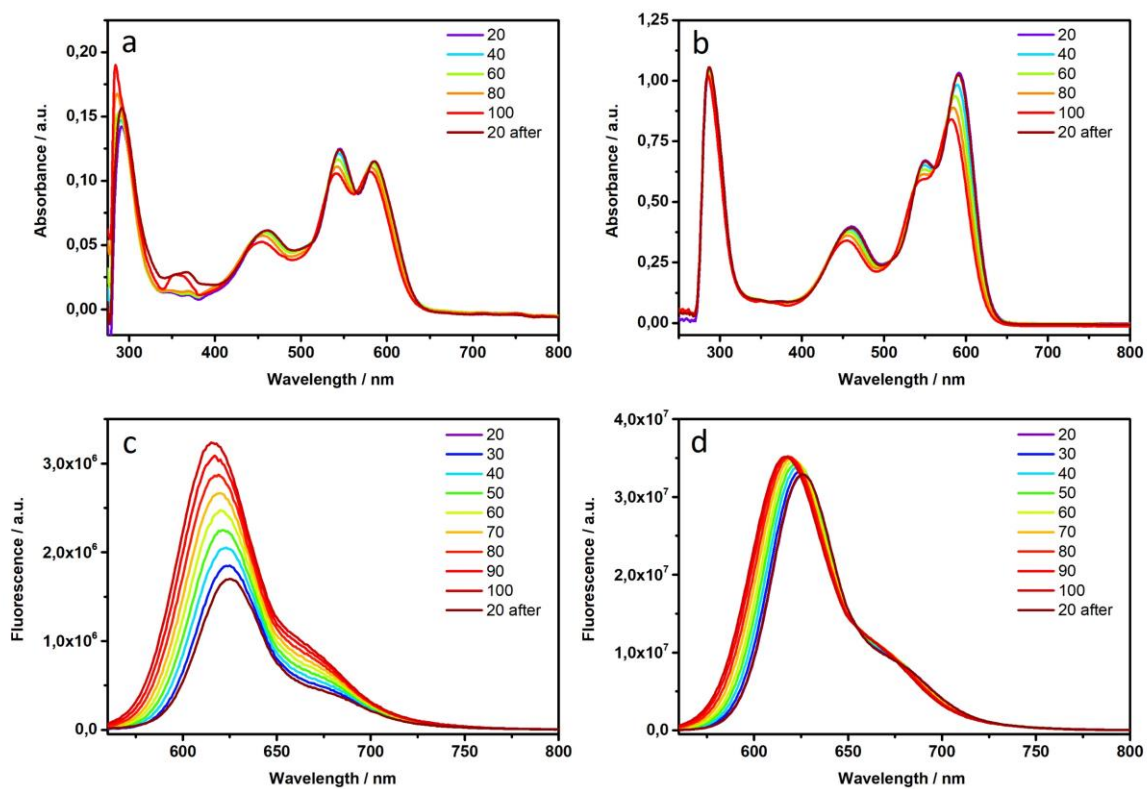

**Figure S43.** Temperature-dependent absorptions of **P2** (a) and **P3** (b) as well as fluorescence of **P2** (c) and **P3** (d) in 1,1,2,2-tetrachloroethane.

## 11. Spectroelectrochemistry

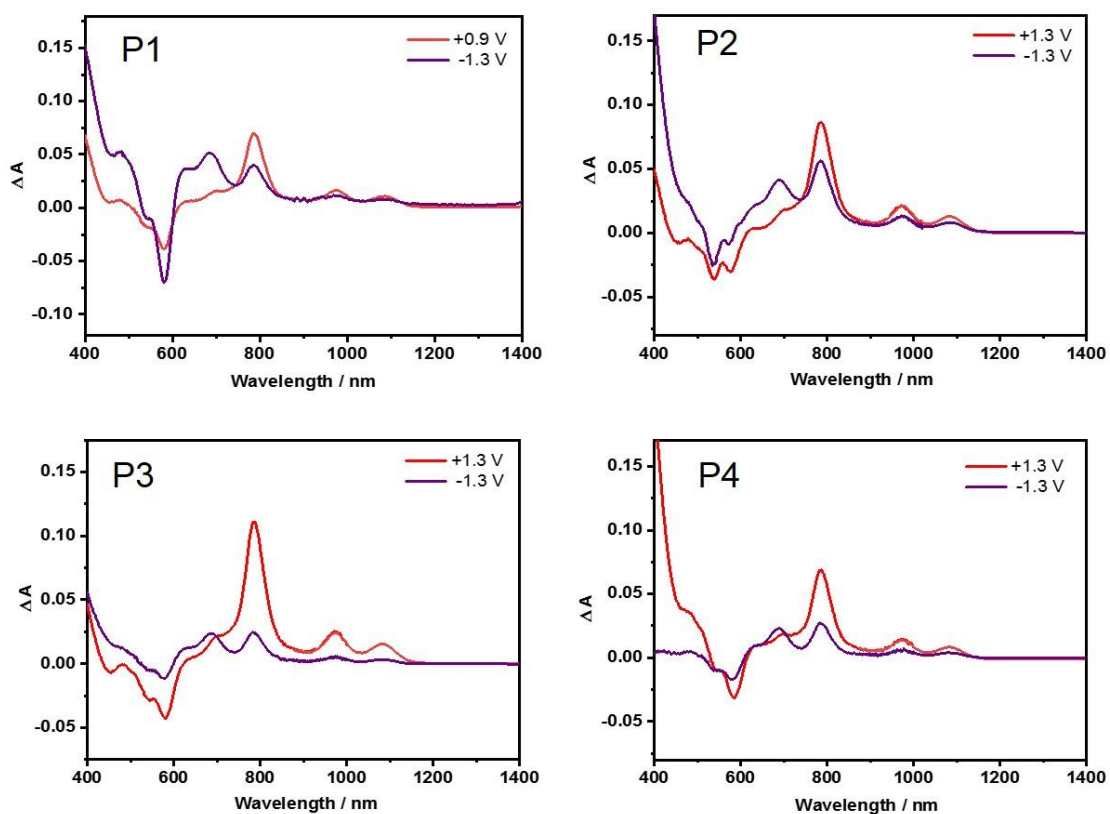

**Figure S44.** Differential absorption spectra of **P1**, **P2**, **P3**, and **P4** in argon-saturated benzonitrile containing 0.1 M TBAPF<sub>6</sub> supporting electrolyte, obtained upon electrochemical oxidation and reduction using Ag wire as reference electrode.

## 12. Transient absorption measurements

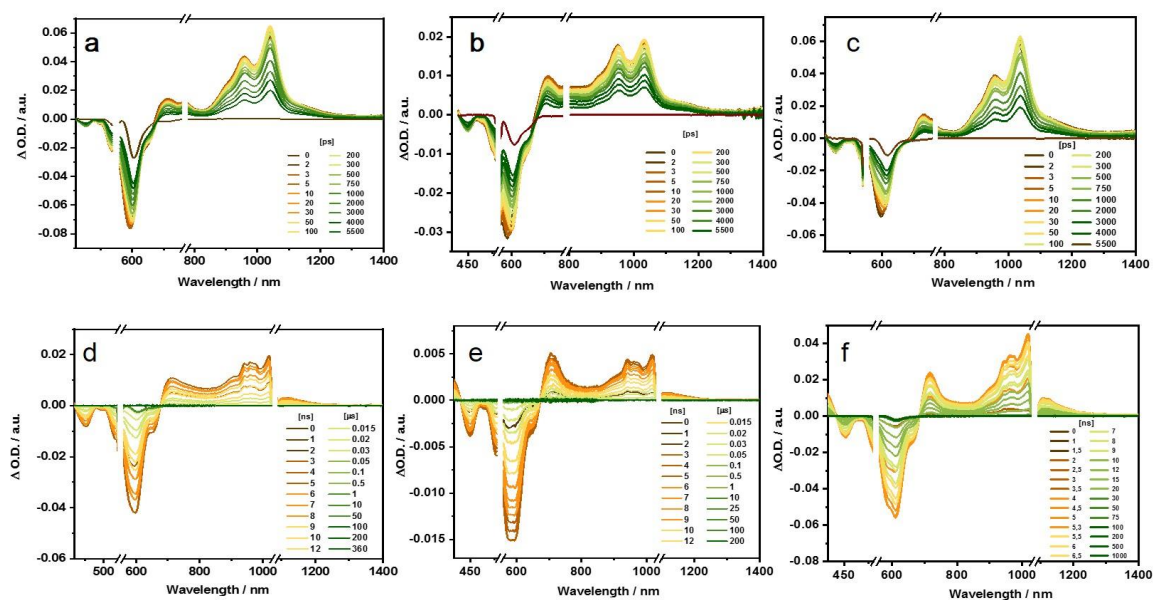

**Figure S45.** Femtosecond differential absorption spectra of **P1** in argon-purged toluene (a), THF (b), and PhCN (c), at time delays between 0 and 5500 ps after 550 nm photo-excitation at rt. Nanosecond differential absorption spectra of **P1** in argon-purged toluene (d), THF (e), and PhCN (f), at time delays between 1 ns and >100  $\mu s$  after 550 nm photo-excitation at rt.

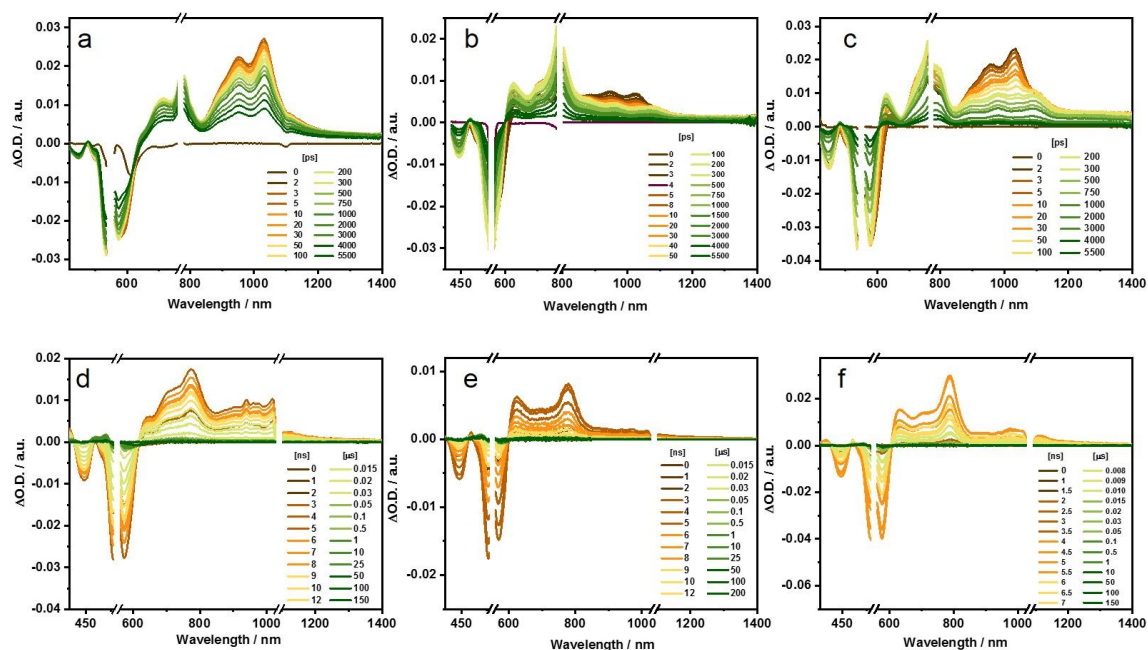

**Figure S46.** Femtosecond differential absorption spectra of **P2** in argon-purged toluene (a), THF (b), and PhCN (c), at time delays between 0 and 5500 ps after 550 nm photo-excitation at rt. Nanosecond differential absorption spectra of **P2** in argon-purged toluene (d), THF (e), and PhCN (f), at time delays between 1 ns and >100  $\mu$ s after 550 nm photo-excitation at rt.

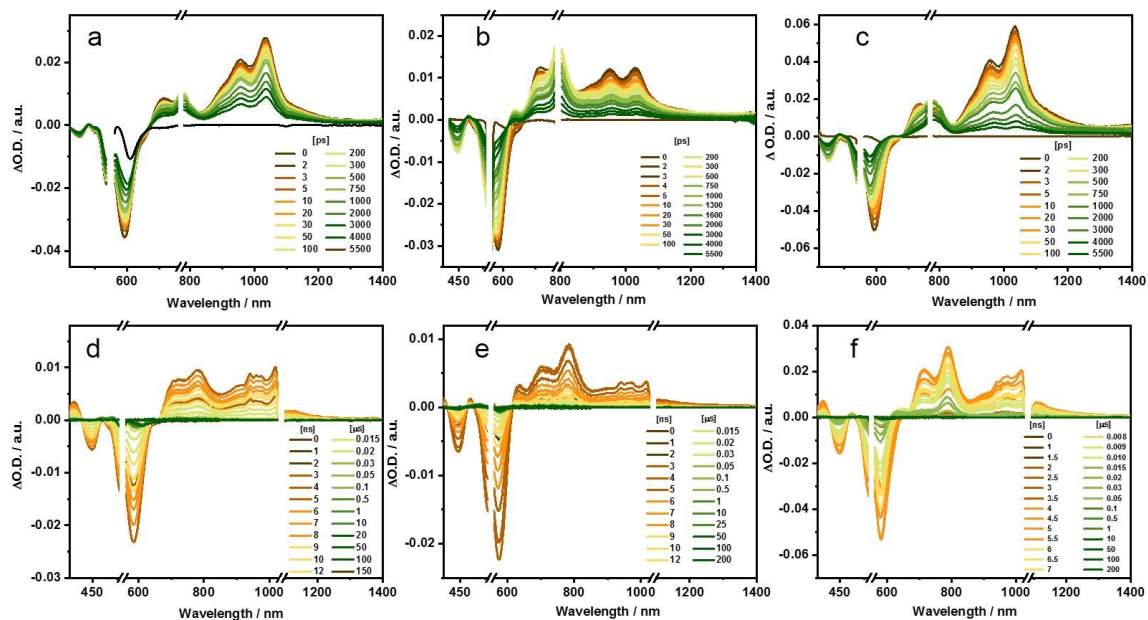

**Figure S47.** Femtosecond differential absorption spectra of **P3** in argon-purged toluene (a), THF (b), and PhCN (c), at time delays between 0 and 5500 ps after 550 nm photo-excitation at rt. Nanosecond differential absorption spectra of **P3** in argon-purged toluene (d), THF (e), and PhCN (f), at time delays between 1 ns and >100  $\mu$ s after 550 nm photo-excitation at rt.

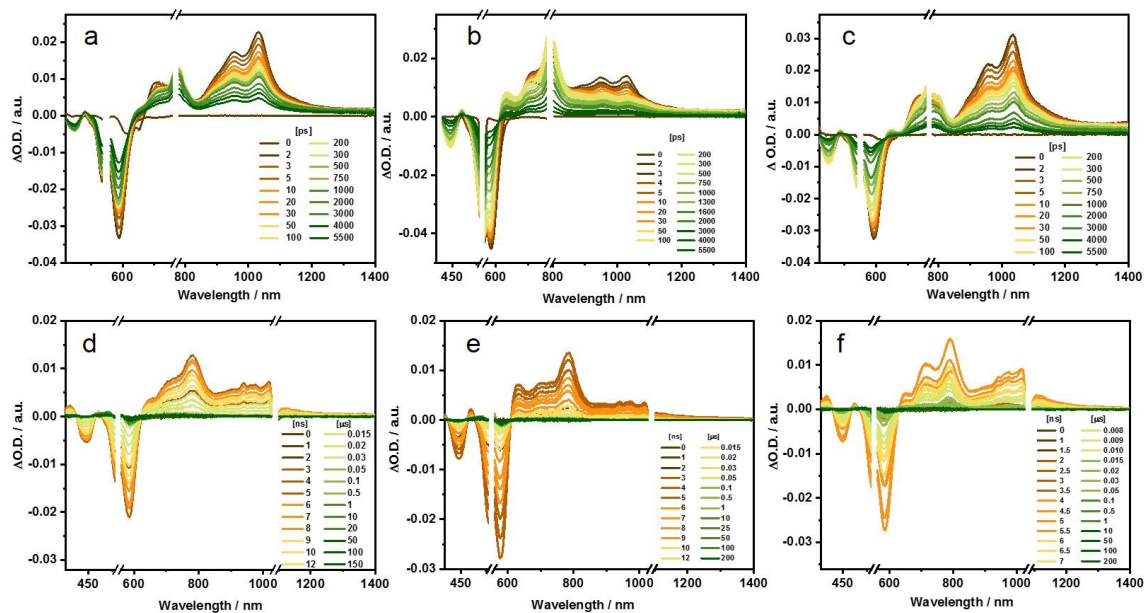

**Figure S48.** Femtosecond differential absorption spectra of **P4** in argon-purged toluene (a), THF (b), and PhCN (c), at time delays between 0 and 5500 ps after 550 nm photo-excitation at rt. Nanosecond differential absorption spectra of **P4** in argon-purged toluene (d), THF (e), and PhCN (f), at time delays between 1 ns and >100  $\mu$ s after 550 nm photo-excitation at rt.

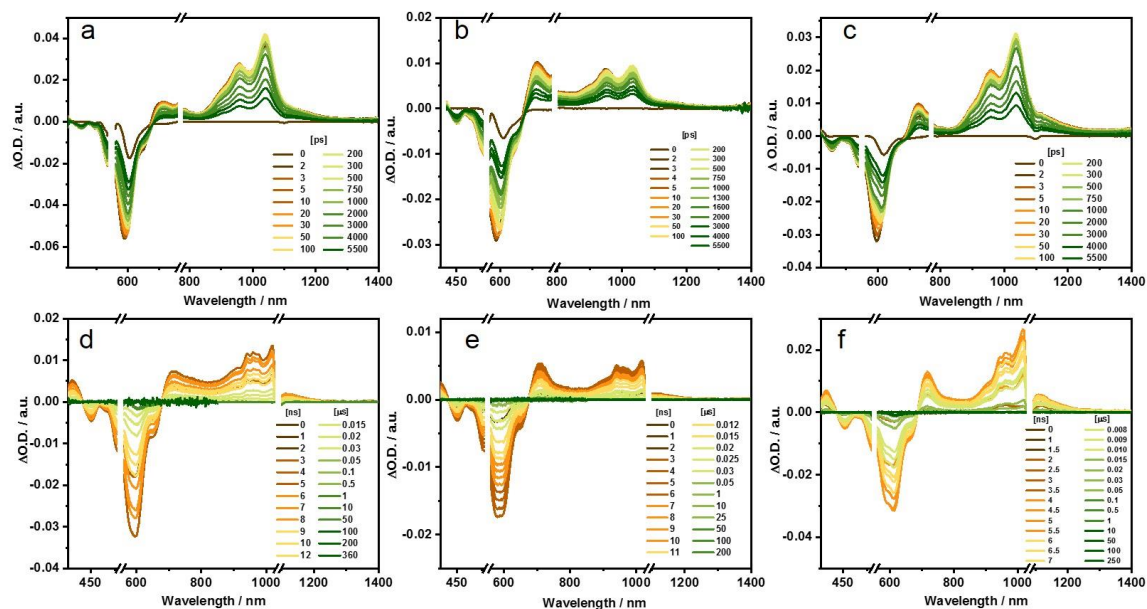

**Figure S49.** Femtosecond differential absorption spectra of **P1F2<sub>Et</sub>** in argon-purged toluene (a), THF (b), and PhCN (c), at time delays between 0 and 5500 ps after 550 nm photo-excitation at rt. Nanosecond differential absorption spectra of **P1F2<sub>Et</sub>** in argon-purged toluene (d), THF (e), and PhCN (f), at time delays between 1 ns and >100  $\mu$ s after 550 nm photo-excitation at rt.



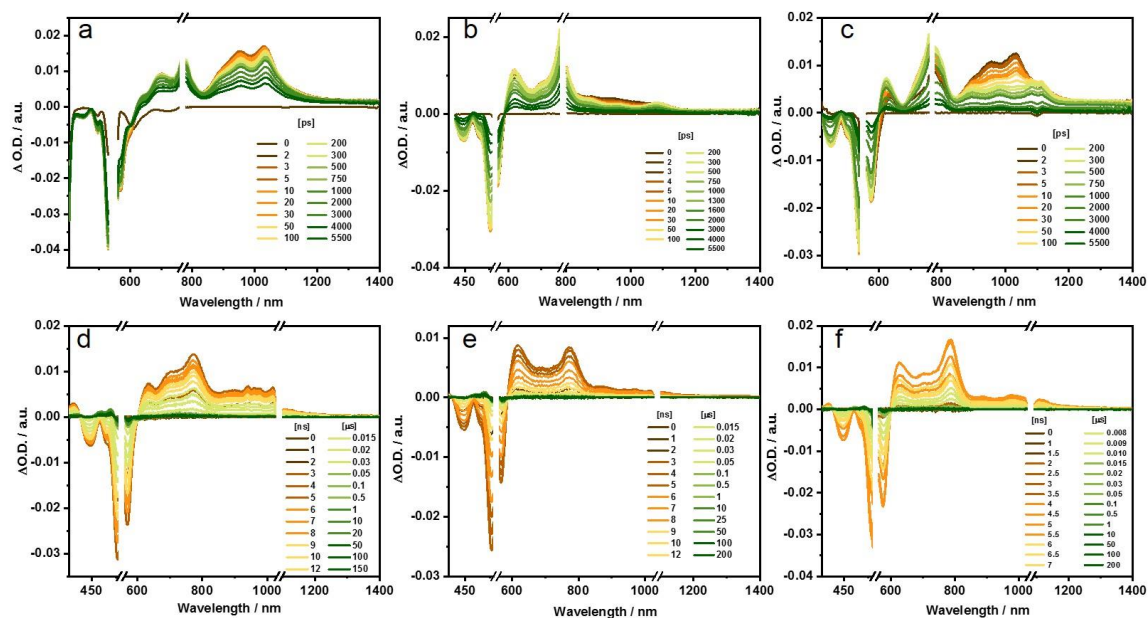

**Figure S50.** Femtosecond differential absorption spectra of **P2F2Et** in argon-purged toluene (a), THF (b), and PhCN (c), at time delays between 0 and 5500 ps after 550 nm photo-excitation at rt. Nanosecond differential absorption spectra of **P2F2Et** in argon-purged toluene (d), THF (e), and PhCN (f), at time delays between 1 ns and >100  $\mu$ s after 550 nm photo-excitation at rt.

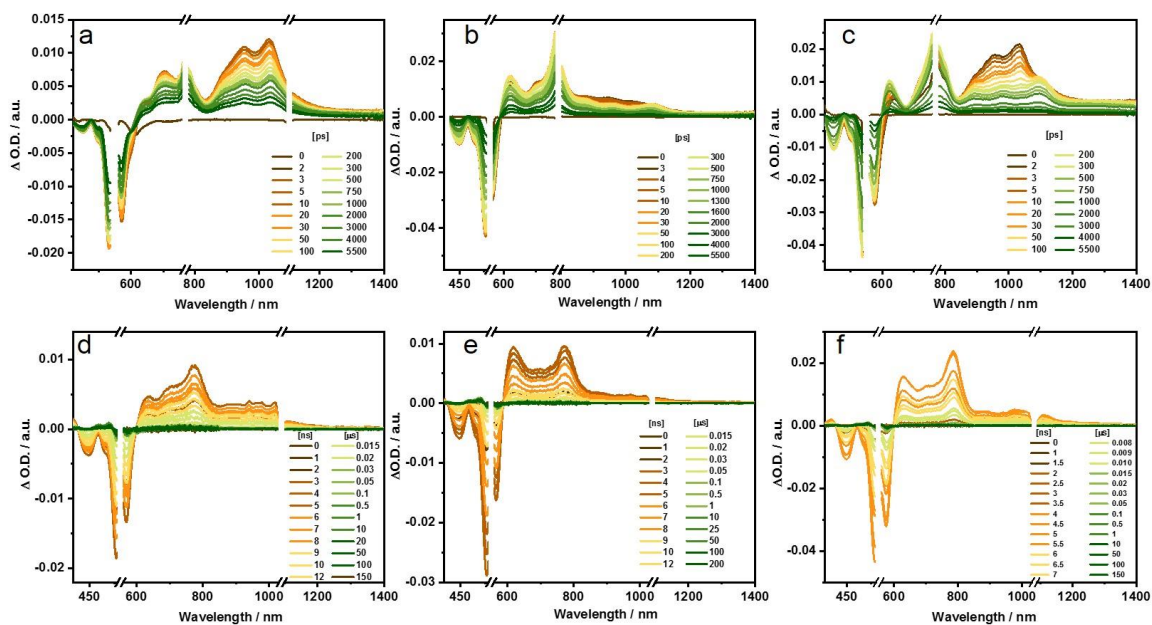

**Figure S51.** Femtosecond differential absorption spectra of **P2F2<sub>TEG</sub>** in argon-purged toluene (a), THF (b), and PhCN (c), at time delays between 0 and 5500 ps after 550 nm photo-excitation at rt. Nanosecond differential absorption spectra of **P2F2<sub>TEG</sub>** in argon-purged toluene (d), THF (e), and PhCN (f), at time delays between 1 ns and >100  $\mu$ s after 550 nm photo-excitation at rt.

### 13. Global analysis of transient absorption spectra

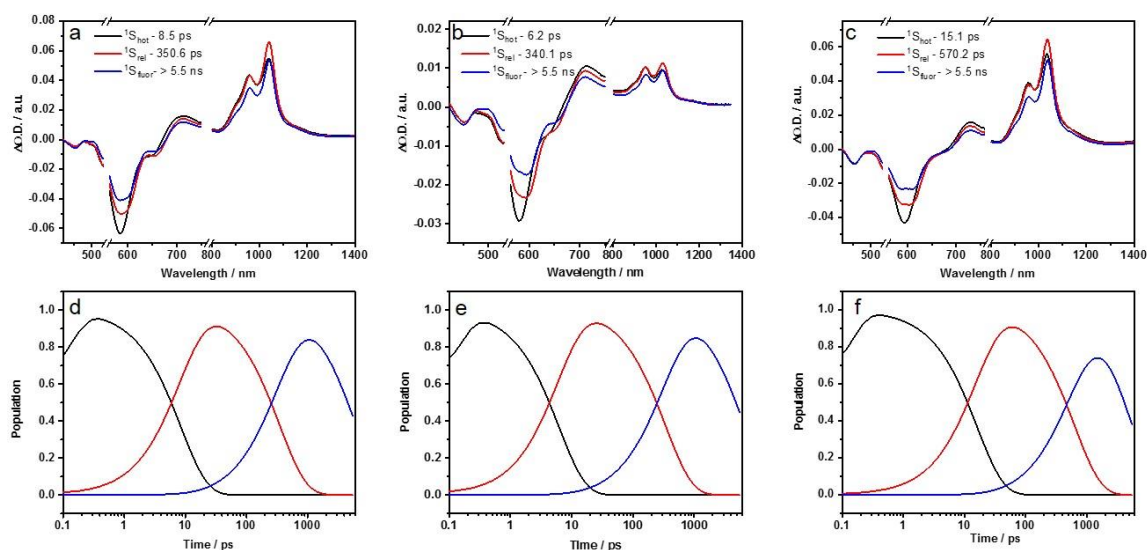

**Figure S52.** Evolution associated spectra reconstructed from the sequential global analysis of fs-TA spectra of **P1** in toluene (a), THF (b), PhCN (c) and the corresponding population kinetics in toluene (d), THF (e), and PhCN (f).

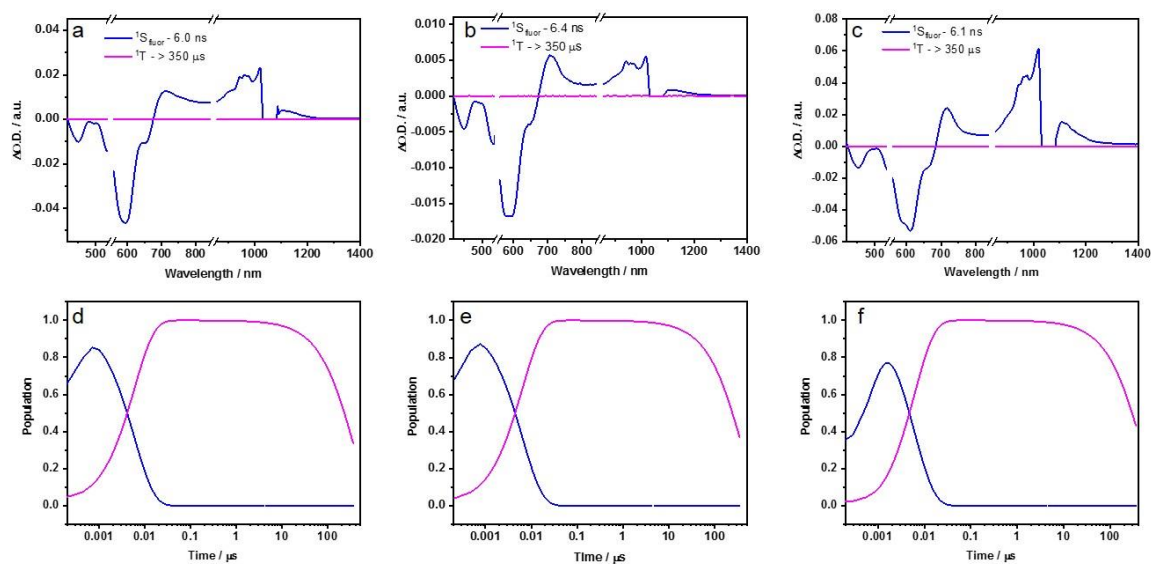

**Figure S53.** Evolution associated spectra reconstructed from the sequential global analysis of ns-TA spectra of **P1** in toluene (a), THF (b), PhCN (c) and the corresponding population kinetics in toluene (d), THF (e), and PhCN (f).

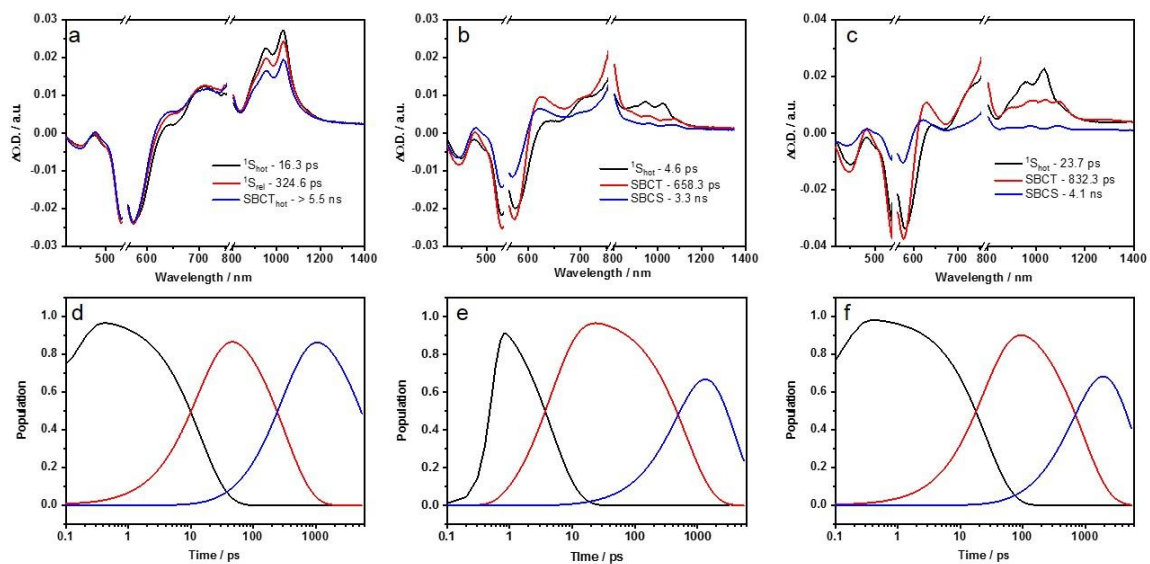

**Figure S54.** Evolution associated spectra reconstructed from the sequential global analysis of fs-TA spectra of **P2** in toluene (a), THF (b), PhCN (c) and the corresponding population kinetics in toluene (d), THF (e), and PhCN (f).

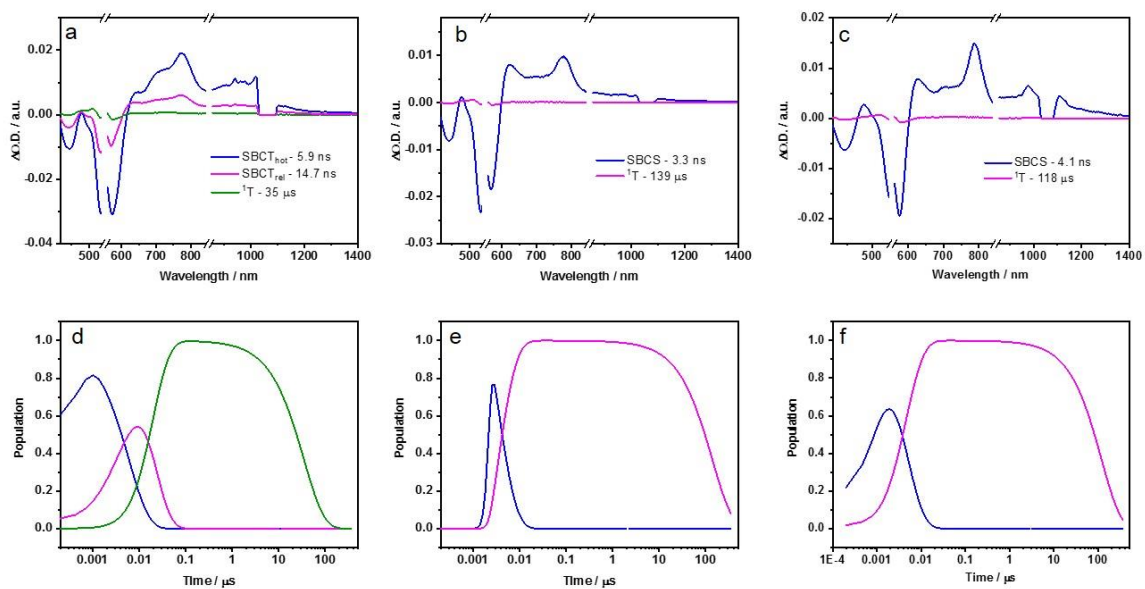

**Figure S55.** Evolution associated spectra reconstructed from the sequential global analysis of ns-TA spectra of **P2** in toluene (a), THF (b), PhCN (c) and the corresponding population kinetics in toluene (d), THF (e), and PhCN (f).

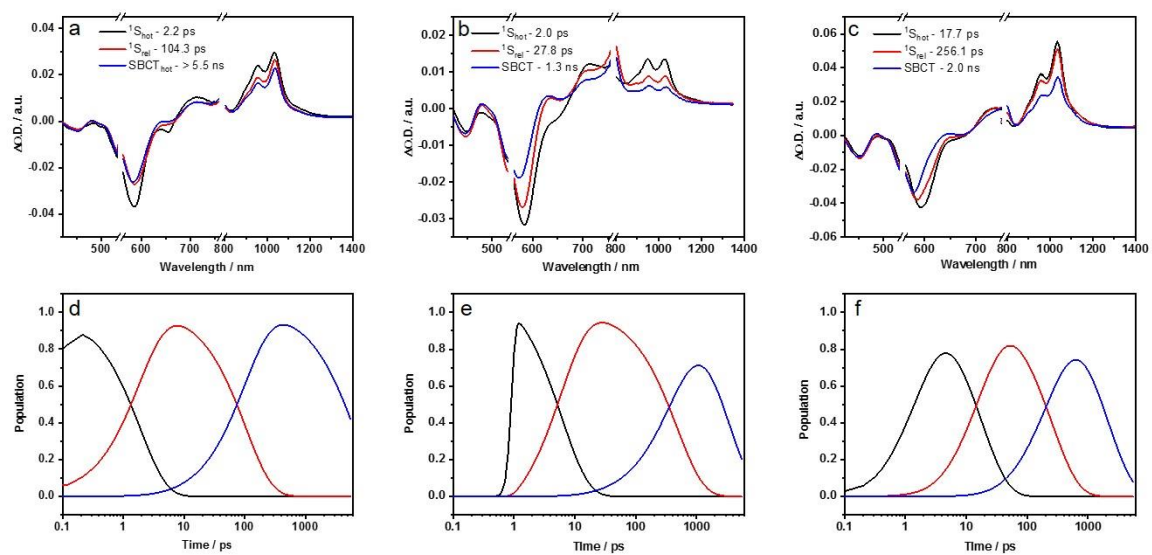

**Figure S56.** Evolution associated spectra reconstructed from the sequential global analysis of fs-TA spectra of **P3** in toluene (a), THF (b), PhCN (c) and the corresponding population kinetics in toluene (d), THF (e), and PhCN (f).

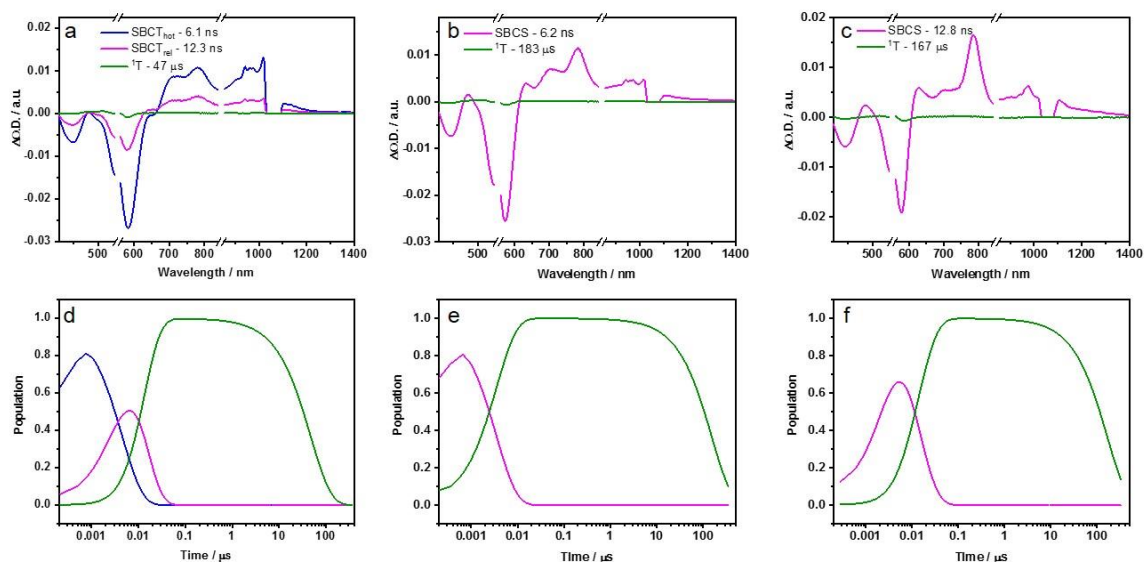

**Figure S57.** Evolution associated spectra reconstructed from the sequential global analysis of ns-TA spectra of **P3** in toluene (a), THF (b), PhCN (c) and the corresponding population kinetics in toluene (d), THF (e), and PhCN (f).



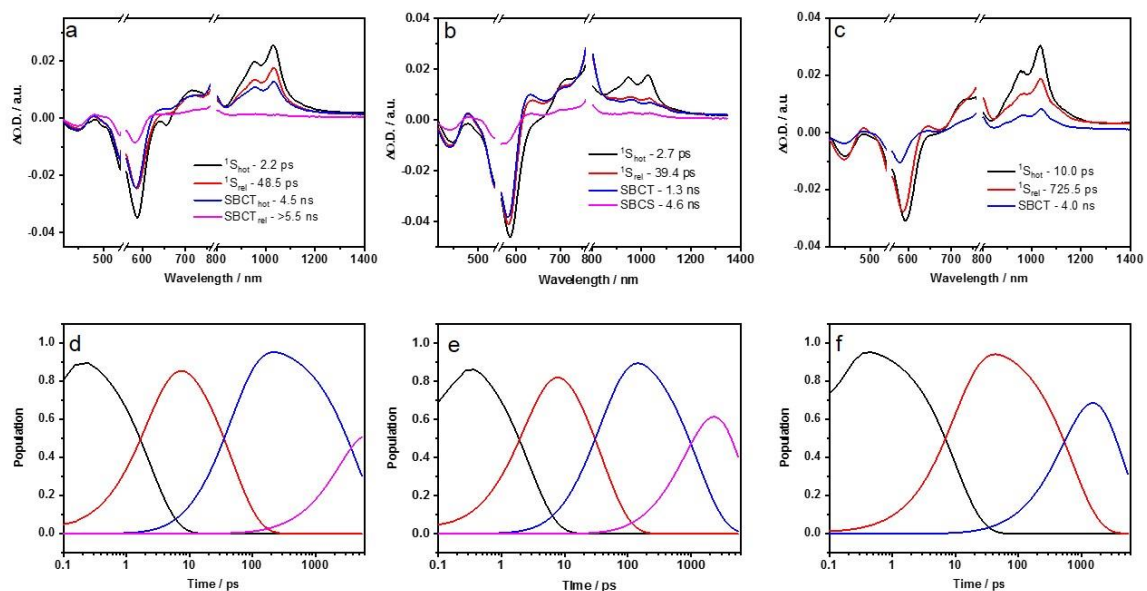

**Figure S58.** Evolution associated spectra reconstructed from the sequential global analysis of fs-TA spectra of **P4** in toluene (a), THF (b), PhCN (c) and the corresponding population kinetics in toluene (d), THF (e), and PhCN (f).

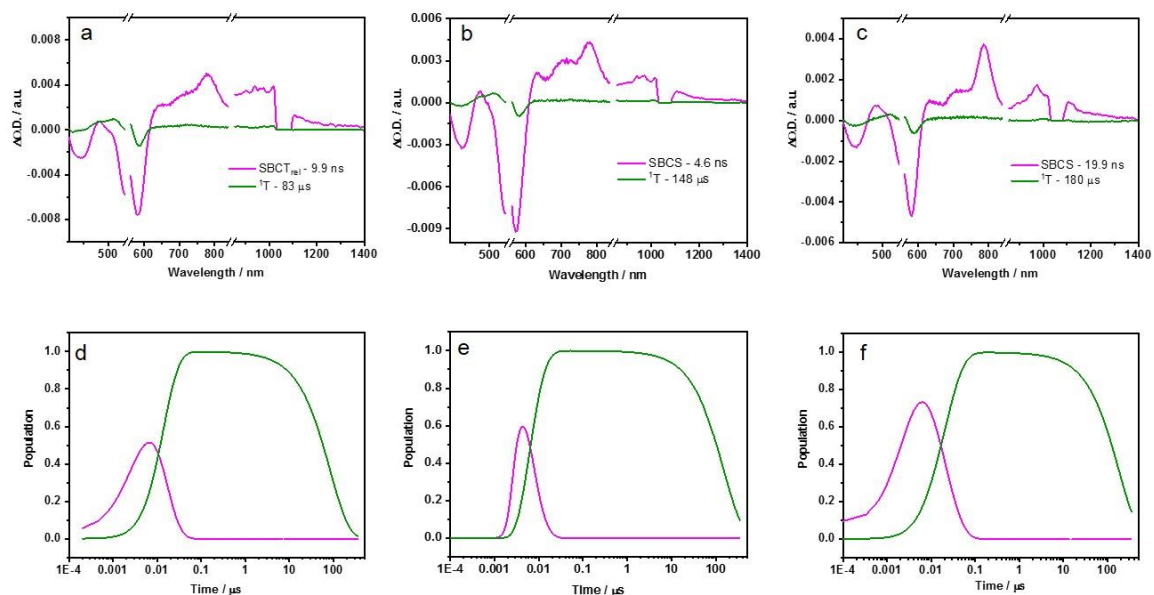

**Figure S59.** Evolution associated spectra reconstructed from the sequential global analysis of ns-TA spectra of **P4** in toluene (a), THF (b), PhCN (c) and the corresponding population kinetics in toluene (d), THF (e), and PhCN (f).

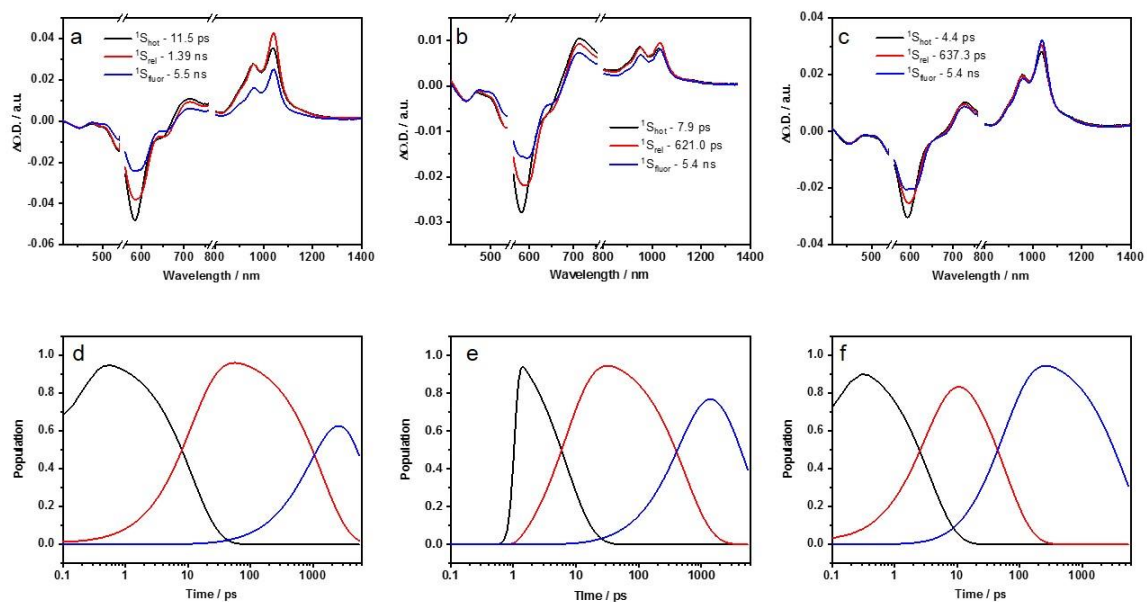

**Figure S60.** Evolution associated spectra reconstructed from the sequential global analysis of fs-TA spectra of **P1F2Et** in toluene (a), THF (b), PhCN (c) and the corresponding population kinetics in toluene (d), THF (e), and PhCN (f).

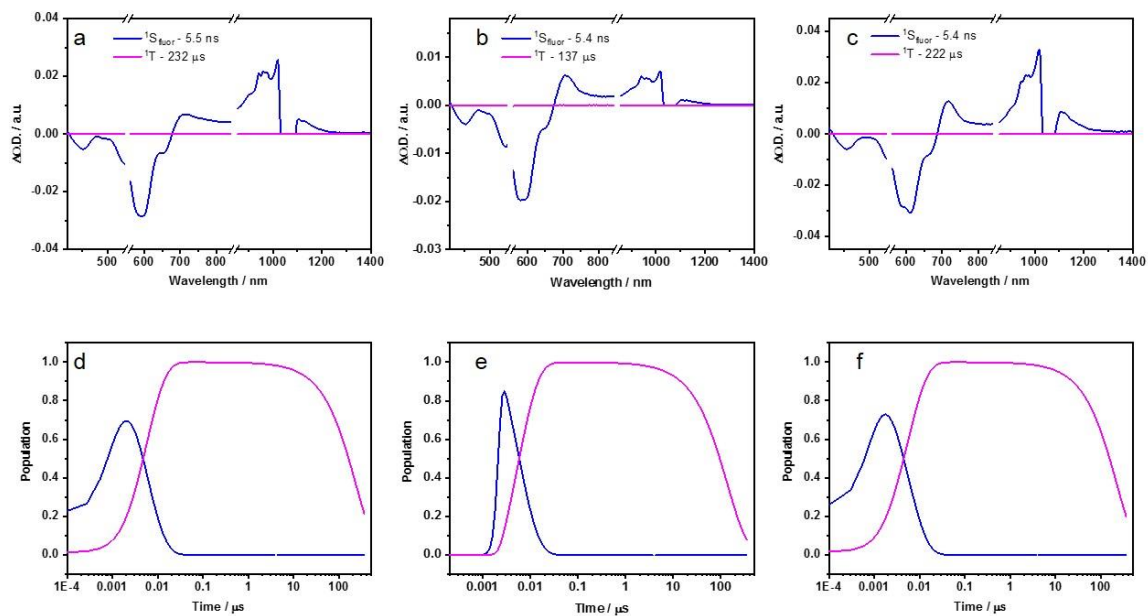

**Figure S61.** Evolution associated spectra reconstructed from the sequential global analysis of ns-TA spectra of **P1F2Et** in toluene (a), THF (b), PhCN (c) and the corresponding population kinetics in toluene (d), THF (e), and PhCN (f).

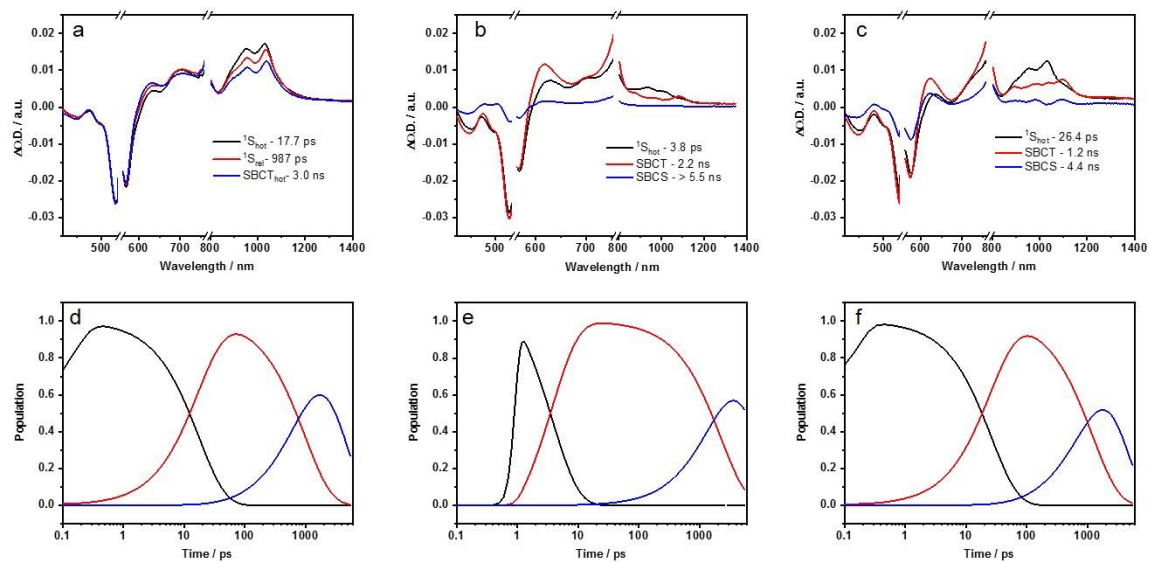

**Figure S62.** Evolution associated spectra reconstructed from the sequential global analysis of fs-TA spectra of **P2F2Et** in toluene (a), THF (b), PhCN (c) and the corresponding population kinetics in toluene (d), THF (e), and PhCN (f).

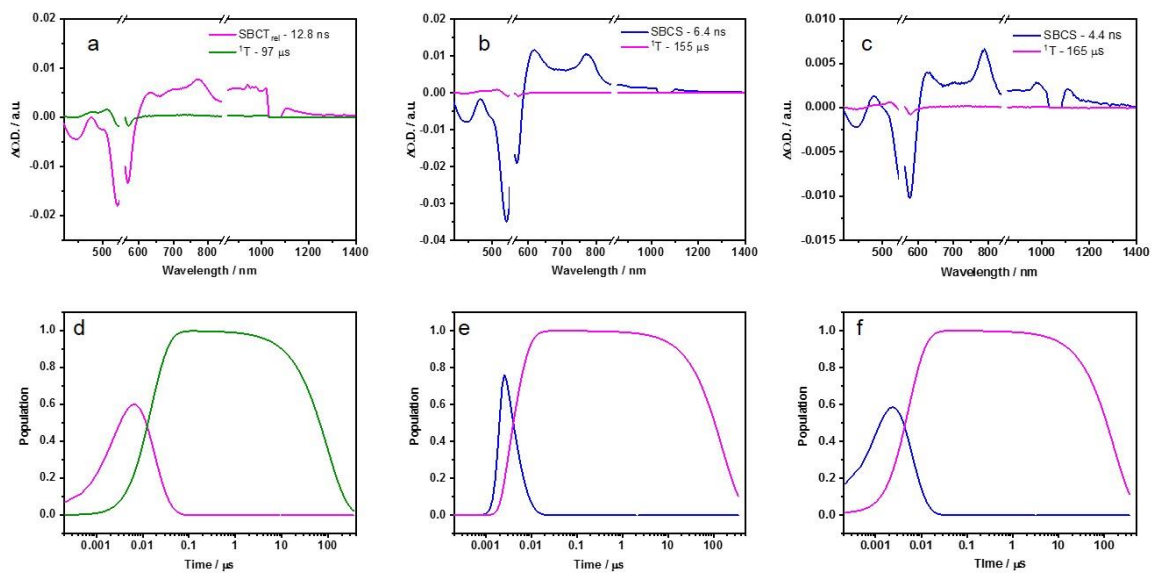

**Figure S63.** Evolution associated spectra reconstructed from the sequential global analysis of ns-TA spectra of **P2F2Et** in toluene (a), THF (b), PhCN (c) and the corresponding population kinetics in toluene (d), THF (e) and PhCN (f).

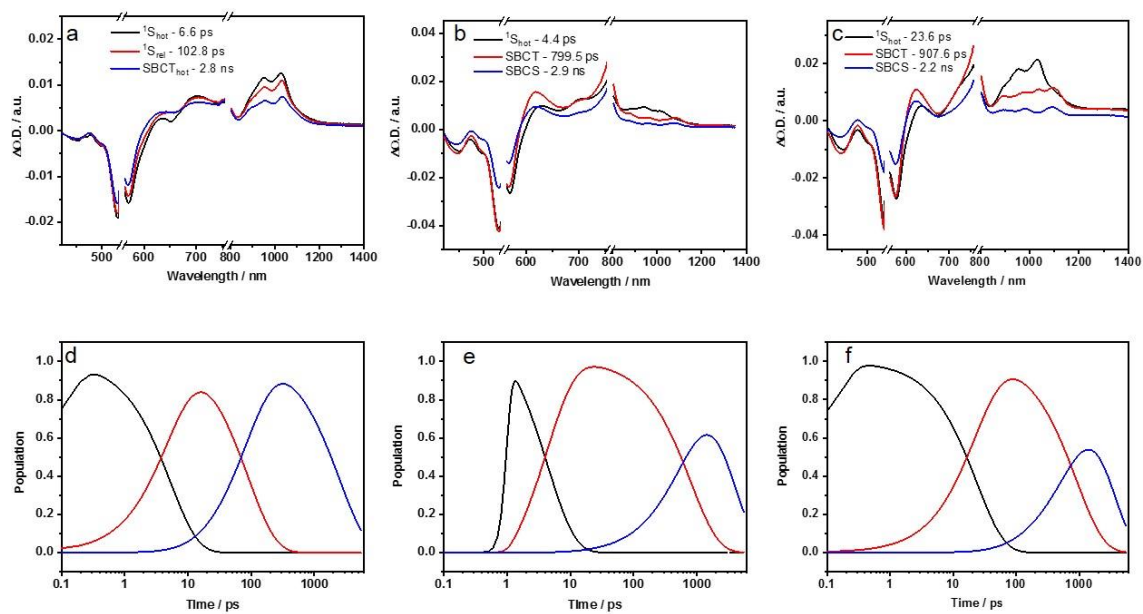

**Figure S64.** Evolution associated spectra reconstructed from the sequential global analysis of fs-TA spectra of **P2F2<sub>TEG</sub>** in toluene (a), THF (b), PhCN (c) and the corresponding population kinetics in toluene (d), THF (e), and PhCN (f).

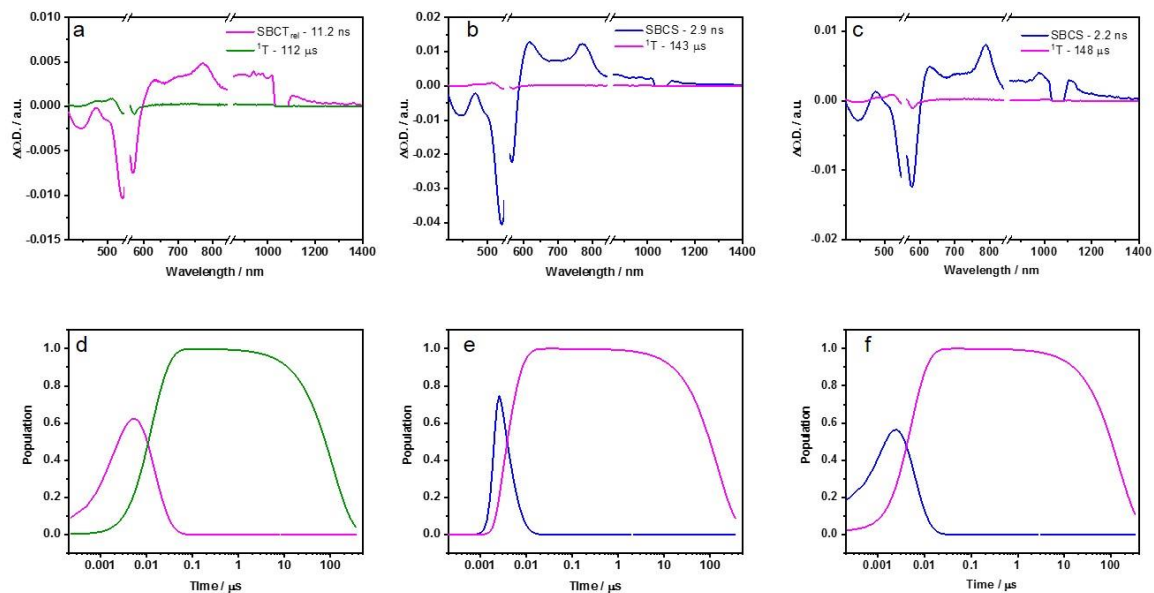

**Figure S65.** Evolution associated spectra reconstructed from the sequential global analysis of ns-TA spectra of **P2F2<sub>TEG</sub>** in toluene (a), THF (b), PhCN (c) and the corresponding population kinetics in toluene (d), THF (e), and PhCN (f).



**Table S4.** Lifetimes of different species involved in the excited state decay dynamics of **P1** and **P1F2<sub>Et</sub>**, determined from the global sequential analysis of fs-TA and ns-TA measurements.

|                          |      | $^1S_{\text{hot}}$<br>(ps) | $^1S_{\text{rel}}$<br>(ps) | $^1S_{\text{fluor}}$<br>(ns) | $^1T$<br>( $\mu\text{s}$ ) |
|--------------------------|------|----------------------------|----------------------------|------------------------------|----------------------------|
| <b>P1</b>                | Tol  | 8.5                        | 350.6                      | 6.0                          | > 350                      |
|                          | THF  | 6.2                        | 340.1                      | 6.4                          | > 350                      |
|                          | PhCN | 15.1                       | 570.2                      | 6.1                          | > 350                      |
| <b>P1F2<sub>Et</sub></b> | Tol  | 11.5                       | 1397.9                     | 5.5                          | 232                        |
|                          | THF  | 7.9                        | 621.0                      | 5.4                          | 137                        |
|                          | PhCN | 4.4                        | 637.3                      | 5.4                          | 222                        |

**Table S5.** Lifetimes of different species involved in the excited state decay dynamics determined from the global sequential analysis of fs-TA and ns-TA measurements for **P2**, **P3**, **P4** as well as **P2F2<sub>Et</sub>** and **P2F2<sub>TEG</sub>**.

|                           |      | $^1S_{hot}$<br>(ps) | $^1S_{rel}$<br>(ps) | SBCT <sub>hot</sub><br>(ns) | SBCT <sub>rel</sub><br>(ns) | SBCS<br>(ns) | $^1T$<br>( $\mu$ s) |
|---------------------------|------|---------------------|---------------------|-----------------------------|-----------------------------|--------------|---------------------|
| <b>P2</b>                 | Tol  | 16.3                | 324.6               | 5.9                         | 14.7                        | -            | 35                  |
|                           | THF  | 4.6                 | -                   | 0.6                         | -                           | 3.3          | 139                 |
|                           | PhCN | 23.7                | -                   | 0.8                         | -                           | 4.1          | 118                 |
| <b>P3</b>                 | Tol  | 2.2                 | 104.3               | 6.1                         | 12.3                        | -            | 47                  |
|                           | THF  | 2.0                 | 27.8                | 1.3                         | -                           | 6.2          | 183                 |
|                           | PhCN | 17.7                | 256.1               | 2.0                         | -                           | 12.8         | 167                 |
| <b>P4</b>                 | Tol  | 2.2                 | 48.5                | 4.5                         | 9.9                         | -            | 83                  |
|                           | THF  | 2.7                 | 39.4                | 1.3                         | -                           | 4.6          | 148                 |
|                           | PhCN | 10.0                | 725.5               | 4.0                         | -                           | 19.9         | 180                 |
| <b>P2F2<sub>Et</sub></b>  | Tol  | 17.7                | 987.0               | 3.0                         | 12.8                        | -            | 97                  |
|                           | THF  | 3.8                 | -                   | 2.2                         | -                           | 6.4          | 155                 |
|                           | PhCN | 26.4                | -                   | 1.2                         | -                           | 4.4          | 165                 |
| <b>P2F2<sub>TEG</sub></b> | Tol  | 6.6                 | 102.8               | 2.8                         | 11.2                        | -            | 112                 |
|                           | THF  | 4.4                 | -                   | 0.8                         | -                           | 2.9          | 143                 |
|                           | PhCN | 23.6                | -                   | 0.9                         | -                           | 2.2          | 148                 |

## 14. Singlet oxygen quantum yield measurements

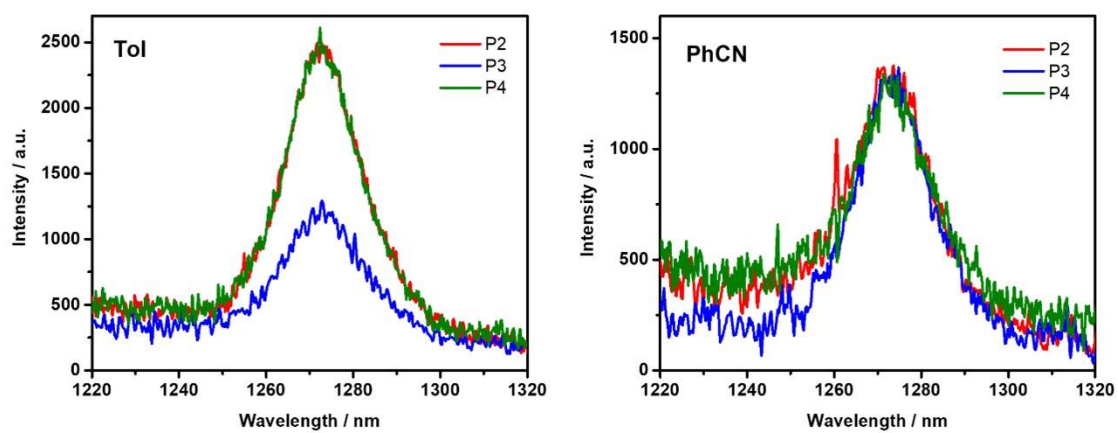

**Figure S66.** Singlet oxygen phosphorescence of **P2**, **P3** and **P4** measured in oxygen saturated toluene and benzonitrile after 532 nm photo-excitation (OD = 0.08).

**Table S6.** Singlet oxygen quantum yields of **P2**, **P3**, and **P4** in toluene and benzonitrile, measured using C<sub>60</sub> in air-equilibrated toluene as reference ( $\Phi_{\Delta}^{\text{ref}} = 0.98 \pm 0.05$ ).

| Compound  | Solvent | $\Phi_{\Delta}$ |
|-----------|---------|-----------------|
| <b>P2</b> | Tol     | $0.67 \pm 0.08$ |
|           | PhCN    | $0.53 \pm 0.07$ |
| <b>P3</b> | Tol     | $0.37 \pm 0.08$ |
|           | PhCN    | $0.43 \pm 0.07$ |
| <b>P4</b> | Tol     | $0.76 \pm 0.07$ |
|           | PhCN    | $0.44 \pm 0.06$ |

## 15. 3D Fluorescence heat map

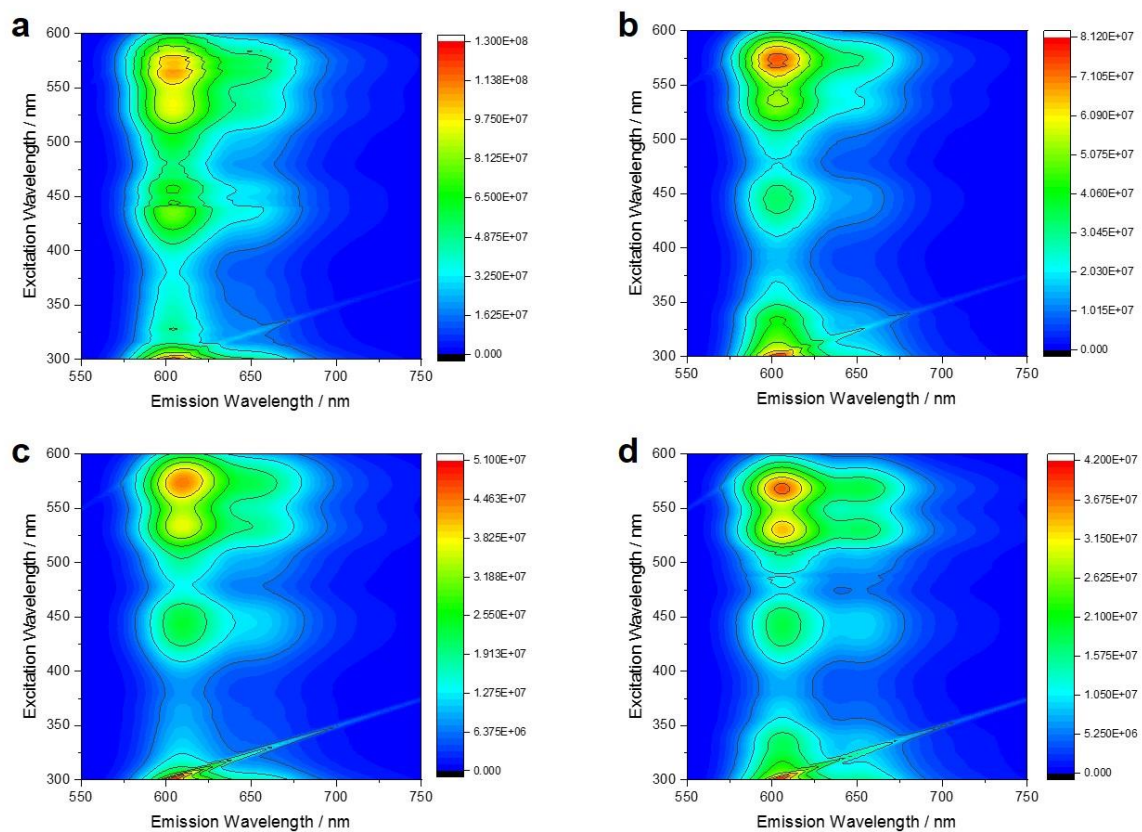

**Figure S67.** 3D fluorescence heat map of (a) **P1**, (b) **P1F<sub>2Et</sub>**, (c) **P2**, and (d) **P2F<sub>2Et</sub>** in toluene at room temperature.

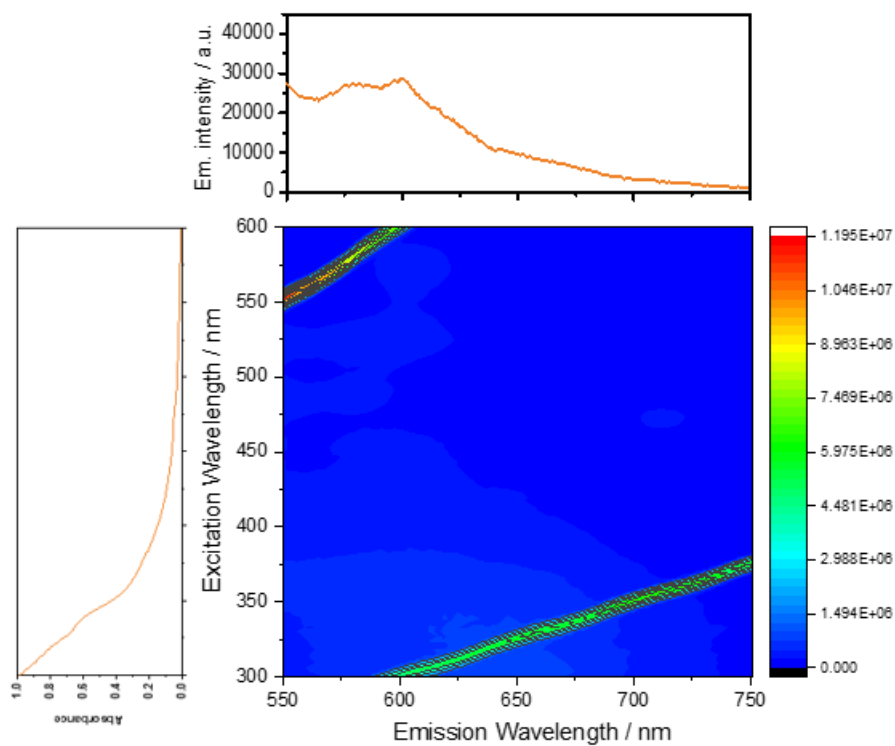

**Figure S68.** 3D fluorescence heat map along with the absorption and emission spectra of fullerene hexakisadduct in toluene at room temperature.

## 16. Literature

- [1] J. J. Snellenburg, S. P. Liptonok, R. Seger, K. M. Mullen, I. H. van Stokkum, *J. Stat. Softw.* **2012**, *49*, 1-22.
- [2] M. Hesse, H. Meier, B. Zeeh, *Spektroskopische Methoden in der organischen Chemie*, Georg Thieme Verlag, **2005**.
